# Supplementary material for: Profile of the Spleen Transcriptome in Beef Steers with Variation in Gain and Feed Intake
Source: Front Genet. 2016 Jul 25;7:127. doi: 10.3389/fgene.2016.00127 (PMC4958634; doi:10.3389/fgene.2016.00127)
Supplement: Supplementary file 1 [file Table1.xlsx]

## Sheet: Sheet1
Supplemental Table 1. Differentially expressed genes in steer spleen. LSMEANS and fold changes by phenotypic quadrant are presented.
Gene1	Transcript ID2	Q1 LSMEAN3	Q1SE4	Q2 LSMEAN	Q2SE	Q3 LSMEAN	Q3SE	Q4 LSMEAN	Q4SE	F	P	FC Q1:25	FC Q1:3	FC Q1:4	FC Q2:3	FC Q2:4	FC Q3:4	FDR6	P_Gain	P_Intake	P_Gain x Intake
CREM	12720762	8.56485	0.105873	8.25759	0.105873	9.26975	0.105873	8.37853	0.105873	18.2839	9.02304e-05	-1.23735	1.63003	-1.13785	2.01692	1.08744	-1.85474	0.754793	0.00210953	0.0173487	0.000105605
LOC100297240	12755282	8.39813	0.110258	8.28532	0.110258	8.90547	0.110258	9.26048	0.110258	16.9682	0.000129253	-1.08133	1.42142	1.818	1.53703	1.96586	1.279	0.754793	2.12499e-05	0.0553848	0.293592
ADORA2A	12748166	9.39531	0.0888847	8.66702	0.0888847	9.38043	0.0888847	9.3406	0.0888847	15.7992	0.000181296	-1.65667	-1.01036	-1.03865	1.63968	1.59502	-1.028	0.754793	0.00300617	0.00221695	0.00099457
TSHZ2	12715184	9.65063	0.116942	9.34701	0.116942	8.73714	0.116942	9.73265	0.116942	14.8997	0.000238433	-1.23423	-1.8836	1.0585	-1.52613	1.30644	1.9938	0.754793	0.0434539	0.000124849	0.0119577
KCNMA1	12827793	7.80619	0.108312	7.21755	0.108312	7.55305	0.108312	8.20065	0.108312	14.6657	0.00025658	-1.50382	-1.19179	1.31446	1.26182	1.97671	1.56656	0.754793	0.00557265	9.80724e-05	0.790095
AADACL3	12740069	5.98829	0.053195	5.89253	0.053195	5.948	0.053195	6.33974	0.053195	14.455	0.000274308	-1.06862	-1.02832	1.27584	1.0392	1.3634	1.31197	0.754793	0.00241832	0.000630083	0.0165864
LOC788572	12901620	6.58113	0.1008	6.55453	0.1008	7.36519	0.1008	6.85058	0.1008	13.9237	0.000325751	-1.01861	1.72196	1.20535	1.75401	1.22778	-1.4286	0.754793	0.000171457	0.0322783	0.019869
SCN4B	12732994	7.71185	0.0612521	7.39795	0.0612521	7.94592	0.0612521	7.63823	0.0612521	13.5802	0.000365004	-1.24306	1.17614	-1.05236	1.46202	1.18122	-1.23772	0.754793	0.00221969	0.960373	0.000273371
HADHB	12703912	11.7405	0.0540882	11.3331	0.0540882	11.3294	0.0540882	11.3707	0.0540882	13.5281	0.000371435	-1.32634	-1.3297	-1.2922	-1.00253	1.02642	1.02902	0.754793	0.00478322	0.0013512	0.00541807
MIR26B	12779838	8.01708	0.086608	8.1223	0.086608	8.43336	0.086608	8.69923	0.086608	12.7761	0.000480565	1.07565	1.33448	1.60453	1.24062	1.49168	1.20237	0.754793	9.39723e-05	0.371933	0.0533651
LATS2	12709303	9.66184	0.0424191	9.89757	0.0424191	9.68693	0.0424191	9.53163	0.0424191	12.7618	0.000482983	1.1775	1.01754	-1.09446	-1.1572	-1.28873	-1.11366	0.754793	0.00170647	0.000601309	0.361839
SH3TC2	12886917	7.31564	0.0622435	7.25869	0.0622435	7.16747	0.0622435	7.67185	0.0622435	12.5938	0.000512395	-1.04026	-1.10816	1.28006	-1.06527	1.3316	1.41851	0.754793	0.0546856	0.000715227	0.00368499
SAA4	12829774	5.92108	0.0538207	6.26089	0.0538207	5.93435	0.0538207	5.82556	0.0538207	12.4499	0.00053926	1.2656	1.00924	-1.06845	-1.25401	-1.35222	-1.07832	0.754793	0.00203134	0.00130503	0.0529927
LOC504233	12849522	6.73869	0.102181	7.18538	0.102181	7.19978	0.102181	6.4621	0.102181	12.4204	0.000544971	1.36291	1.37658	-1.21133	1.01003	-1.65093	-1.66749	0.754793	0.223727	8.53305e-05	0.179962
SYT11	12847721	9.4091	0.0748334	8.86489	0.0748334	8.88486	0.0748334	9.20102	0.0748334	12.3157	0.000565823	-1.45822	-1.43817	-1.15515	1.01394	1.26237	1.24501	0.754793	0.232737	9.18426e-05	0.153494
BDKRB2	12790904	4.59637	0.0575683	5.03561	0.0575683	4.8427	0.0575683	4.64261	0.0575683	12.257	0.000577908	1.35589	1.18618	1.03257	-1.14307	-1.31313	-1.14877	0.754793	0.226797	0.000125214	0.0599256
HTR3C	12684929	6.32762	0.0806244	6.06546	0.0806244	6.58364	0.0806244	6.69687	0.0806244	12.1869	0.00059274	-1.19927	1.19418	1.29168	1.43215	1.54908	1.08165	0.754793	0.000135503	0.0382076	0.373876
SSLP1	12829075	6.66099	0.105715	6.32962	0.105715	7.09787	0.105715	7.07716	0.105715	12.1047	0.000610707	-1.25821	1.35368	1.33439	1.70321	1.67893	-1.01446	0.754793	0.000115773	0.167464	0.121739
EFCAB2	12741146	7.74984	0.0623213	7.70205	0.0623213	7.78587	0.0623213	7.31954	0.0623213	12.0054	0.000633258	-1.03368	1.02529	-1.34751	1.05983	-1.3036	-1.38159	0.754793	0.0166595	0.00569607	0.00140855
DOHH	12880011	7.53614	0.0596035	7.4118	0.0596035	7.06639	0.0596035	7.24596	0.0596035	11.7142	0.000705228	-1.09001	-1.38487	-1.22279	-1.27051	-1.12182	1.13255	0.754793	0.000178827	0.0254895	0.651446
LOC100301430	12734266	7.04432	0.0576717	7.43244	0.0576717	7.44005	0.0576717	7.439	0.0576717	11.6031	0.000735169	1.30869	1.3156	1.31465	1.00529	1.00455	-1.00073	0.754793	0.00448254	0.00552905	0.0057184
	12913181	8.2702	0.0735969	8.80643	0.0735969	8.7591	0.0735969	8.73962	0.0735969	11.6003	0.000735937	1.45018	1.40337	1.38455	-1.03335	-1.0474	-1.01359	0.754793	0.0141537	0.00264607	0.0042964
LOC510901	12727485	8.47493	0.0899508	8.43692	0.0899508	8.75494	0.0899508	9.09656	0.0899508	11.5274	0.000756418	-1.02669	1.21421	1.53862	1.24661	1.57968	1.26718	0.754793	0.000213618	0.0565147	0.117268
HSPH1	12709282	12.8229	0.448399	12.4433	0.448399	15.45	0.448399	12.1639	0.448399	11.3551	0.000807493	-1.30103	6.17772	-1.57902	8.03738	-1.21367	-9.75472	0.754793	0.022473	0.00707454	0.00150539
	12913349	9.83906	0.0557572	9.60105	0.0557572	9.96285	0.0557572	10.0221	0.0557572	11.1809	0.000863264	-1.17937	1.08959	1.13524	1.28503	1.33887	1.0419	0.754793	0.000375041	0.020587	0.134821
N4BP2L1	12710632	11.8352	0.189701	11.8045	0.189701	12.864	0.189701	11.3772	0.189701	11.0809	0.000897321	-1.02151	2.04036	-1.37366	2.08425	-1.34474	-2.80276	0.754793	0.138862	0.00236093	0.00176215
SLC18A1	12895507	7.0276	0.0639169	6.6867	0.0639169	7.06585	0.0639169	7.17816	0.0639169	10.9792	0.00093356	-1.26655	1.02687	1.11	1.30058	1.40587	1.08095	0.754793	0.00136165	0.00403141	0.0989936
	12910995	4.73942	0.0220326	4.87029	0.0220326	4.75102	0.0220326	4.70208	0.0220326	10.9134	0.000957932	1.09496	1.00807	-1.02622	-1.08619	-1.12367	-1.03451	0.754793	0.00396694	0.00152421	0.087669
MIR9-2	12882834	6.94818	0.149603	6.3693	0.149603	7.30859	0.149603	7.4878	0.149603	10.8783	0.000971202	-1.49369	1.28379	1.45359	1.91758	2.17121	1.13227	0.754793	0.000340477	0.0262416	0.206412
AP1G2	12687517	7.78157	0.0577376	8.01934	0.0577376	7.78353	0.0577376	8.16912	0.0577376	10.8353	0.00098782	1.17917	1.00136	1.30817	-1.17757	1.1094	1.30639	0.754793	0.213417	0.224695	0.000160552
LOC100335170	12914747	7.36836	0.0649982	6.94836	0.0649982	7.39582	0.0649982	7.12185	0.0649982	10.7168	0.00103524	-1.33793	1.01922	-1.18633	1.36364	1.12778	-1.20914	0.754793	0.14809	0.283289	0.000176904
LOC100335443	12914809	7.99937	0.12031	7.73381	0.12031	8.63988	0.12031	8.32495	0.12031	10.6879	0.00104722	-1.2021	1.55889	1.25317	1.87395	1.50644	-1.24395	0.754793	0.000253792	0.840864	0.0327636
TP73	12739587	7.99117	0.0721492	7.65186	0.0721492	8.13567	0.0721492	8.16537	0.0721492	10.646	0.00106484	-1.26515	1.10535	1.12834	1.39843	1.42752	1.0208	0.754793	0.000654573	0.0251274	0.0530594
LOC538947	12806461	6.38972	0.0680317	6.22515	0.0680317	6.42547	0.0680317	6.75354	0.0680317	10.5815	0.00109269	-1.12083	1.02509	1.28683	1.14896	1.44232	1.25533	0.754793	0.00135567	0.00351028	0.25268
RPUSD2	12688501	7.09539	0.0640114	6.76529	0.0640114	6.59415	0.0640114	6.81729	0.0640114	10.5621	0.0011012	-1.25711	-1.41543	-1.2126	-1.12594	1.03671	1.16727	0.754793	0.00430982	0.000993527	0.419721
LOC100295414	12804215	6.97471	0.0703716	7.08751	0.0703716	6.68958	0.0703716	7.2276	0.0703716	10.5242	0.00111812	1.08132	-1.21852	1.19159	-1.31761	1.10197	1.45198	0.754793	0.323093	0.0106386	0.000585979
LOC100297834	12713339	14.8614	0.0633586	14.624	0.0633586	15.0397	0.0633586	14.6168	0.0633586	10.3729	0.00118867	-1.17889	1.13155	-1.18474	1.33397	-1.00497	-1.3406	0.754793	0.201729	0.169028	0.000217984
MIR192	12832247	6.09563	0.0721185	6.51921	0.0721185	6.27438	0.0721185	5.98803	0.0721185	10.3672	0.00119141	1.34125	1.1319	-1.07744	-1.18496	-1.44512	-1.21955	0.754793	0.0309612	0.00035262	0.360153
SFN	12782527	8.3526	0.075353	7.94616	0.075353	8.5227	0.075353	8.24513	0.075353	10.3396	0.0012049	-1.32541	1.12514	-1.07733	1.49127	1.23027	-1.21215	0.754793	0.00897847	0.409248	0.000679382
FLRT1	12832212	7.70306	0.0680502	7.86633	0.0680502	8.21343	0.0680502	7.85602	0.0680502	10.057	0.00135343	1.11982	1.42442	1.11185	1.272	-1.00717	-1.28112	0.826639	0.00318198	0.00241432	0.179245
GPATCH1	12751977	10.815	0.0842626	10.7623	0.0842626	10.2273	0.0842626	10.5965	0.0842626	9.92758	0.0014285	-1.03717	-1.5028	-1.16356	-1.44894	-1.12187	1.29155	0.832202	0.000763739	0.0277829	0.0849248
PRICKLE1	12863077	7.99644	0.0607002	8.16676	0.0607002	8.32627	0.0607002	8.42942	0.0607002	9.73334	0.00155048	1.12531	1.25687	1.35002	1.11691	1.19969	1.07411	0.832202	0.000378171	0.590222	0.0437923
LOC100139916	12810925	7.45814	0.160028	8.50444	0.160028	7.73645	0.160028	7.44053	0.160028	9.70297	0.00157064	2.06523	1.21278	-1.01228	-1.70289	-2.09059	-1.22767	0.832202	0.0303388	0.00124574	0.0370799
PGC	12805628	8.21933	0.0595914	8.15035	0.0595914	8.46273	0.0595914	8.53403	0.0595914	9.68963	0.00157959	-1.04897	1.18378	1.24376	1.24175	1.30466	1.05066	0.832202	0.000200588	0.262016	0.98474
CLVS2	12900949	6.28479	0.0549883	6.25188	0.0549883	6.40093	0.0549883	6.62864	0.0549883	9.61339	0.00163187	-1.02307	1.08383	1.26914	1.10884	1.29842	1.17097	0.832202	0.00074998	0.0354187	0.101884
GALE	12776995	8.14909	0.034763	8.40174	0.034763	8.33798	0.034763	8.31146	0.034763	9.5711	0.00166175	1.19139	1.13989	1.11912	-1.04518	-1.06458	-1.01856	0.832202	0.181522	0.00171355	0.00692577
COG2	12828017	11.2673	0.073621	11.3995	0.073621	10.9077	0.073621	11.3764	0.073621	9.54286	0.00168205	1.09598	-1.28303	1.07856	-1.40617	-1.01616	1.38381	0.832202	0.0232707	0.0413149	0.00152365
TRA2B	12682407	14.8765	0.0785758	14.849	0.0785758	15.3315	0.0785758	14.8195	0.0785758	9.54053	0.00168374	-1.01926	1.37081	-1.04025	1.39721	-1.02059	-1.42598	0.832202	0.0190126	0.00949316	0.00495968
TRIM38	12806110	10.3582	0.164956	11.0477	0.164956	9.8302	0.164956	10.2037	0.164956	9.53043	0.00169108	1.61268	-1.44192	-1.11303	-2.32536	-1.79496	1.29549	0.832202	0.00132635	0.357108	0.00732782
LOC100297334	12902413	9.02321	0.0909811	8.52707	0.0909811	9.0009	0.0909811	9.16988	0.0909811	9.40749	0.00178348	-1.41044	-1.01559	1.10701	1.38879	1.56137	1.12427	0.832202	0.00517265	0.0032944	0.0973688
HOXB1	12764053	6.49317	0.0817931	6.39948	0.0817931	6.22805	0.0817931	6.82403	0.0817931	9.38402	0.00180179	-1.06709	-1.20174	1.25776	-1.12618	1.34215	1.5115	0.832202	0.349014	0.0011975	0.00970738
CCDC17	12838567	7.54903	0.0522146	7.40469	0.0522146	7.78135	0.0522146	7.65374	0.0522146	9.35163	0.00182741	-1.10523	1.17472	1.07527	1.29833	1.18842	-1.09248	0.832202	0.000601003	0.875385	0.0230467
TBKBP1	12773444	6.65337	0.101815	7.14909	0.101815	6.70362	0.101815	6.40046	0.101815	9.34949	0.00182911	1.41002	1.03544	-1.19161	-1.36176	-1.6802	-1.23384	0.832202	0.00498848	0.00202343	0.36298
ARSK	12880522	7.78115	0.0813178	8.07998	0.0813178	7.81065	0.0813178	7.47305	0.0813178	9.32545	0.00184842	1.23015	1.02066	-1.23808	-1.20525	-1.52302	-1.26366	0.832202	0.00399332	0.00205997	0.815604
SKP1	12844219	12.1942	0.14298	11.3988	0.14298	12.4087	0.14298	11.999	0.14298	9.23258	0.00192528	-1.73562	1.16028	-1.1449	2.01381	1.51595	-1.32841	0.832202	0.0146499	0.202253	0.00120077
SMG9	12759252	8.62651	0.0460098	8.50256	0.0460098	8.65016	0.0460098	8.34556	0.0460098	9.21469	0.00194051	-1.08972	1.01653	-1.215	1.10773	-1.11496	-1.23508	0.832202	0.172936	0.0732262	0.000553478
CPT2	12843141	9.94001	0.0716821	9.65835	0.0716821	9.42277	0.0716821	9.57106	0.0716821	9.2134	0.00194161	-1.21559	-1.43121	-1.29141	-1.17738	-1.06237	1.10825	0.832202	0.00119584	0.0110876	0.370534
SYT9	12732926	7.35398	0.0866168	7.21295	0.0866168	7.20805	0.0866168	7.76127	0.0866168	9.0392	0.00209759	-1.10269	-1.10644	1.3262	-1.0034	1.46238	1.46735	0.871829	0.0385656	0.00173797	0.0348015
TK2	12759241	9.03885	0.0964243	9.16661	0.0964243	8.53369	0.0964243	9.10303	0.0964243	9.00215	0.00213262	1.0926	-1.41927	1.04549	-1.5507	-1.04506	1.48384	0.871829	0.0121639	0.040952	0.00354872
MGC148942	12701074	9.33839	0.0909505	9.31808	0.0909505	8.76048	0.0909505	9.03567	0.0909505	8.99032	0.00214394	-1.01418	-1.49268	-1.23347	-1.47181	-1.21622	1.21015	0.871829	0.000488918	0.130225	0.18649
	12796710	15.7928	0.08868	15.4029	0.08868	15.934	0.08868	15.9901	0.08868	8.91149	0.00222125	-1.31037	1.1028	1.14649	1.44508	1.50233	1.03962	0.871829	0.00145467	0.0271674	0.0841967
LOC539314	12915273	10.4822	0.176778	10.5832	0.176778	11.4677	0.176778	10.2702	0.176778	8.90763	0.00222512	1.07254	1.97993	-1.15831	1.84603	-1.24233	-2.29338	0.871829	0.0814679	0.0031913	0.00916956
SUGT1	12711869	11.743	0.129154	11.5977	0.129154	12.3864	0.129154	11.5597	0.129154	8.87003	0.00226321	-1.10594	1.56201	-1.13546	1.72749	-1.02669	-1.77359	0.871829	0.0371342	0.021656	0.00270727
GBP6	12839917	8.58196	0.175695	8.90943	0.175695	8.14779	0.175695	7.70768	0.175695	8.84955	0.00228427	1.25481	-1.35113	-1.8331	-1.69541	-2.30019	-1.35671	0.871829	0.000555115	0.0495005	0.754051
LOC100337062	12869707	11.2821	0.156423	11.2674	0.156423	11.8205	0.156423	10.6839	0.156423	8.80834	0.00232735	-1.01024	1.45236	-1.51385	1.46724	-1.49851	-2.19866	0.871829	0.887705	0.0037396	0.00314794
	12771676	16.8415	0.0895174	16.2743	0.0895174	16.6105	0.0895174	16.8274	0.0895174	8.74759	0.0023926	-1.48157	-1.17367	-1.00977	1.26234	1.46724	1.16231	0.871829	0.0972061	0.000896722	0.0741966
SLC5A3	12683494	13.6375	0.274175	13.084	0.274175	14.7413	0.274175	12.971	0.274175	8.71584	0.00242754	-1.46764	2.14916	-1.58725	3.1542	-1.08149	-3.41125	0.871829	0.0959172	0.0465202	0.00115193
MIR1843	12852744	9.62112	0.0989807	9.30015	0.0989807	9.92906	0.0989807	9.89074	0.0989807	8.64481	0.0025079	-1.24918	1.23793	1.20549	1.5464	1.50587	-1.02692	0.871829	0.000679145	0.178838	0.0945861
KLHL25	12793030	6.7288	0.0865121	7.31461	0.0865121	7.20503	0.0865121	7.08941	0.0865121	8.64139	0.00251184	1.50088	1.3911	1.28398	-1.07892	-1.16894	-1.08343	0.871829	0.172455	0.0015991	0.0186922
DUSP3	12772767	7.52457	0.0443778	7.52984	0.0443778	7.66776	0.0443778	7.79868	0.0443778	8.63692	0.00251702	1.00365	1.10434	1.20925	1.10032	1.20485	1.09499	0.871829	0.000567824	0.182263	0.15087
ALOX12B	12768091	7.21081	0.0616128	6.90261	0.0616128	7.01616	0.0616128	7.29944	0.0616128	8.5909	0.00257096	-1.23816	-1.14444	1.06336	1.08189	1.31661	1.21695	0.871829	0.126771	0.000433569	0.843078
CNOT6L	12874351	13.5283	0.0909076	13.6891	0.0909076	14.0536	0.0909076	13.4571	0.0909076	8.56426	0.00260281	1.11791	1.43916	-1.05066	1.28737	-1.17454	-1.51207	0.871829	0.132888	0.00131023	0.0337316
LOC100336530	12730593	13.0522	0.100582	12.969	0.100582	13.4333	0.100582	12.7237	0.100582	8.56241	0.00260503	-1.05938	1.30233	-1.25575	1.37967	-1.18536	-1.63541	0.871829	0.512507	0.00895428	0.00195789
MIR151	12723888	4.84516	0.102895	5.15717	0.102895	5.30418	0.102895	4.64333	0.102895	8.43124	0.00276885	1.24144	1.37461	-1.15015	1.10728	-1.42785	-1.58102	0.911751	0.794489	0.000490638	0.115816
MTR	12825795	10.3889	0.106495	10.3397	0.106495	10.1954	0.106495	9.71262	0.106495	8.40811	0.00279896	-1.03474	-1.14357	-1.59804	-1.10518	-1.54438	-1.39741	0.911751	0.00229911	0.0645353	0.0280237
DNAJB4	12847198	11.4931	0.389186	11.1564	0.389186	13.6297	0.389186	11.619	0.389186	8.29082	0.00295765	-1.26286	4.39747	1.09121	5.55339	1.37804	-4.02992	0.950768	0.00589464	0.0525758	0.0107457
KCNIP2	12822999	6.988	0.0767354	7.14654	0.0767354	7.09277	0.0767354	7.49414	0.0767354	8.16725	0.0031363	1.11616	1.07532	1.42024	-1.03798	1.27244	1.32076	0.977691	0.0121997	0.139587	0.00333673
	12914143	7.82874	0.113906	7.52592	0.113906	8.1611	0.113906	8.23005	0.113906	8.13904	0.00317884	-1.23356	1.25907	1.3207	1.55314	1.62916	1.04895	0.977691	0.00066649	0.128648	0.324839
MIR2309	12911115	13.2949	0.074041	13.1427	0.074041	13.5605	0.074041	13.5747	0.074041	8.1073	0.0032275	-1.11121	1.20214	1.21409	1.33582	1.3491	1.00994	0.977691	0.000504782	0.283117	0.370254
GPR135	12697519	8.16318	0.0960319	8.04391	0.0960319	8.31986	0.0960319	8.67216	0.0960319	8.06752	0.0032897	-1.08619	1.11472	1.42304	1.21079	1.54569	1.27659	0.977691	0.00150754	0.030297	0.248374
TMED2	12687317	7.94689	0.235617	7.93543	0.235617	7.53827	0.235617	6.52381	0.235617	8.06361	0.00329588	-1.00797	-1.32742	-2.68158	-1.31692	-2.66037	-2.02015	0.977691	0.00225742	0.0547033	0.0501543
ZNF696	12724888	7.91641	0.0615011	7.67689	0.0615011	8.00421	0.0615011	8.07846	0.0615011	8.04705	0.00332226	-1.1806	1.06274	1.11887	1.25468	1.32094	1.05281	0.977691	0.00183127	0.0254212	0.203916
SIRT6	12880704	9.31255	0.0566675	9.59341	0.0566675	9.24969	0.0566675	9.50021	0.0566675	7.98309	0.00342641	1.21491	-1.04454	1.13891	-1.26902	-1.06673	1.18963	0.977691	0.193663	0.793508	0.0005246
DNAJA4	12790479	9.08077	0.273965	8.85987	0.273965	10.4139	0.273965	8.74614	0.273965	7.93546	0.00350645	-1.16546	2.51948	-1.26105	2.93636	-1.08202	-3.1772	0.977691	0.0459845	0.021551	0.00483259
MYCN	12708143	6.82019	0.115264	6.90749	0.115264	7.0796	0.115264	7.54737	0.115264	7.91293	0.00354508	1.06238	1.19699	1.65539	1.12671	1.5582	1.38296	0.977691	0.00210635	0.124768	0.0330477
LOC100140422	12713216	7.74596	0.118176	8.18204	0.118176	7.36897	0.118176	7.75324	0.118176	7.90596	0.00355712	1.35293	-1.29862	1.00506	-1.75694	-1.34612	1.30519	0.977691	0.00518041	0.830125	0.00462368
MIR1193	12788816	4.99822	0.0775023	4.82787	0.0775023	5.24241	0.0775023	4.75256	0.0775023	7.85871	0.00364007	-1.12532	1.18443	-1.18563	1.33287	-1.05359	-1.40429	0.977691	0.297309	0.0616333	0.00110922
LOC526769	12740020	7.1571	0.0719988	7.01755	0.0719988	7.17952	0.0719988	7.49425	0.0719988	7.81581	0.00371732	-1.10156	1.01566	1.26326	1.11881	1.39156	1.24378	0.977691	0.00466363	0.00830019	0.247157
SLC26A7	12726088	7.05262	0.060926	6.99019	0.060926	7.37238	0.060926	7.07819	0.060926	7.7937	0.00375789	-1.04423	1.24812	1.01788	1.30332	1.0629	-1.2262	0.977691	0.00581925	0.0814505	0.0126813
DDX47	12867269	10.3002	0.0759476	10.1288	0.0759476	9.80809	0.0759476	9.96818	0.0759476	7.74352	0.00385185	-1.12609	-1.40645	-1.25873	-1.24897	-1.11779	1.11735	0.977691	0.00103724	0.0497332	0.942282
MIR98	12910825	7.78472	0.1113	7.25868	0.1113	7.95054	0.1113	7.47826	0.1113	7.72308	0.00389092	-1.43997	1.12181	-1.23667	1.61536	1.1644	-1.3873	0.977691	0.108988	0.813238	0.000746175
ZNF667	12752293	8.47546	0.0866059	8.21822	0.0866059	8.78849	0.0866059	8.60874	0.0866059	7.68759	0.00395985	-1.19519	1.24231	1.09678	1.4848	1.31087	-1.13268	0.977691	0.00157672	0.662555	0.0267694
LOC767881	12910353	6.77681	0.102833	7.25002	0.102833	7.26566	0.102833	7.44045	0.102833	7.64693	0.00404058	1.38819	1.40332	1.58407	1.0109	1.1411	1.1288	0.977691	0.00630826	0.172418	0.00836357
PPAP2C	12883718	7.39165	0.0707844	7.33111	0.0707844	7.10642	0.0707844	6.97423	0.0707844	7.56067	0.00421826	-1.04286	-1.21861	-1.33554	-1.16853	-1.28065	-1.09595	0.977691	0.000682908	0.621994	0.198417
MIR544B-1	12713421	7.67388	0.166729	8.13777	0.166729	7.53151	0.166729	7.0244	0.166729	7.55925	0.00422126	1.37926	-1.10372	-1.56861	-1.52231	-2.16352	-1.42121	0.977691	0.00269211	0.013034	0.899015
PTPRE	12819166	13.4916	0.160545	14.0683	0.160545	13.1042	0.160545	13.1654	0.160545	7.55659	0.00422688	1.49136	-1.30803	-1.25373	-1.95074	-1.86976	1.04332	0.977691	0.00170452	0.134403	0.0703162
SNAP91	12897264	5.49981	0.0658845	5.4055	0.0658845	5.25954	0.0658845	5.69035	0.0658845	7.50585	0.0043359	-1.06756	-1.18121	1.14119	-1.10646	1.21829	1.34799	0.977691	0.740912	0.00180927	0.0252941
LOC100337482	12788957	10.484	0.115449	10.1259	0.115449	9.93803	0.115449	9.74234	0.115449	7.48498	0.00438168	-1.28178	-1.46003	-1.67213	-1.13906	-1.30453	-1.14527	0.977691	0.0016821	0.495101	0.0336013
TARS	12787233	14.1422	0.115259	14.1133	0.115259	13.5555	0.115259	13.6113	0.115259	7.484	0.00438385	-1.02025	-1.50183	-1.44478	-1.47202	-1.4161	1.03949	0.977691	0.000494764	0.71938	0.908865
MIR1281	12856471	10.3358	0.153052	10.4836	0.153052	10.6989	0.153052	11.2871	0.153052	7.45903	0.00443942	1.10788	1.28619	1.93365	1.16095	1.74536	1.5034	0.977691	0.00247878	0.175773	0.033245
CRK	12769888	12.7211	0.0491859	12.5426	0.0491859	12.7829	0.0491859	12.5073	0.0491859	7.45195	0.00445531	-1.13171	1.04377	-1.15974	1.18124	-1.02477	-1.2105	0.977691	0.792209	0.343092	0.00059411
PPP1R3F	12903961	7.28721	0.0805886	7.35296	0.0805886	7.43555	0.0805886	7.78116	0.0805886	7.44163	0.00447861	1.04663	1.1083	1.40831	1.05892	1.34556	1.27069	0.977691	0.00380244	0.108076	0.0253582
IL20	12735662	5.52151	0.0379992	5.32085	0.0379992	5.3727	0.0379992	5.28683	0.0379992	7.42816	0.00450922	-1.14923	-1.10866	-1.17665	1.0366	-1.02386	-1.06133	0.977691	0.0331715	0.156794	0.00267013
STK32C	12822495	7.45853	0.0655714	7.71262	0.0655714	7.77603	0.0655714	7.42083	0.0655714	7.40616	0.00455978	1.19258	1.24617	-1.02647	1.04494	-1.22416	-1.27917	0.977691	0.847811	0.000564297	0.455614
FUBP1	12838206	14.4863	0.0929934	14.3406	0.0929934	14.8565	0.0929934	14.3034	0.0929934	7.37421	0.00463434	-1.10632	1.29251	-1.13518	1.42994	-1.02608	-1.46724	0.977691	0.0986	0.0490012	0.00273254
PHF1	12801560	10.6115	0.0949582	10.1967	0.0949582	10.8136	0.0949582	10.497	0.0949582	7.36551	0.0046549	-1.33307	1.15041	-1.08256	1.53358	1.23141	-1.24539	0.977691	0.0213488	0.614656	0.0023062
ALKBH1	12696488	8.9142	0.069075	8.79159	0.069075	8.67523	0.069075	8.47379	0.069075	7.35658	0.00467611	-1.0887	-1.18015	-1.35699	-1.08399	-1.24643	-1.14985	0.977691	0.00166875	0.578791	0.0370046
LOC751804	12868825	5.64843	0.106084	6.32623	0.106084	6.15256	0.106084	6.05245	0.106084	7.34524	0.00470319	1.5997	1.41827	1.32319	-1.12793	-1.20897	-1.07185	0.977691	0.298945	0.00322765	0.0185101
CDC123	12719385	12.1536	0.105889	12.489	0.105889	11.8771	0.105889	11.8938	0.105889	7.32466	0.00475282	1.26173	-1.21129	-1.19733	-1.52832	-1.51071	1.01166	0.977691	0.00142971	0.158245	0.12225
TMPRSS2	12684354	6.33908	0.0735234	6.28613	0.0735234	6.72952	0.0735234	6.48623	0.0735234	7.28775	0.00484337	-1.03739	1.3108	1.10738	1.35981	1.14878	-1.1837	0.977691	0.00171157	0.219859	0.0669076
ZNF34	12726052	8.32245	0.112265	7.67396	0.112265	8.24453	0.112265	8.2572	0.112265	7.25152	0.00493422	-1.56752	-1.05549	-1.04626	1.48511	1.49821	1.00882	0.977691	0.0439522	0.0122663	0.0151269
LOC505465	12892894	11.0567	0.078305	10.8619	0.078305	10.5565	0.078305	10.9104	0.078305	7.20692	0.00504878	-1.14459	-1.41436	-1.10675	-1.2357	1.03419	1.27794	0.977691	0.0137304	0.00435541	0.330015
UBE2Q1	12836616	13.6419	0.0909063	13.6949	0.0909063	13.1727	0.0909063	13.3712	0.0909063	7.19144	0.00508926	1.03737	-1.38439	-1.20646	-1.43612	-1.25154	1.14748	0.977691	0.000926146	0.438955	0.191934
NR2E1	12900712	6.00903	0.0785693	6.46273	0.0785693	6.09246	0.0785693	6.03975	0.0785693	7.1889	0.00509595	1.36955	1.05954	1.02153	-1.29259	-1.34069	-1.03721	0.977691	0.0516404	0.00731735	0.0253804
DBR1	12681176	9.1014	0.0889241	9.07992	0.0889241	8.59127	0.0889241	8.85096	0.0889241	7.1878	0.00509884	-1.015	-1.42418	-1.18957	-1.40313	-1.17199	1.19722	0.977691	0.00133286	0.139883	0.20527
MIR2348	12911133	12.7582	0.0970062	12.6212	0.0970062	12.9668	0.0970062	13.2171	0.0970062	7.17239	0.0051396	-1.09954	1.15559	1.37452	1.27061	1.51134	1.18945	0.977691	0.00135529	0.0691688	0.569711
LOC532341	12839769	7.36548	0.107095	6.8257	0.107095	7.45728	0.107095	7.09135	0.107095	7.10806	0.00531393	-1.45376	1.06569	-1.20927	1.54926	1.20218	-1.28871	0.977691	0.121021	0.432773	0.00117104
RNF17	12712247	6.39818	0.0837273	6.09535	0.0837273	6.50849	0.0837273	6.61196	0.0837273	7.1066	0.00531796	-1.23356	1.07946	1.15972	1.33157	1.43058	1.07435	0.977691	0.00280268	0.0319496	0.256868
LOC100138210	12914453	4.82836	0.0498626	5.07772	0.0498626	4.86255	0.0498626	5.07059	0.0498626	7.09433	0.00535202	1.18868	1.02398	1.18283	-1.16084	-1.00495	1.15512	0.977691	0.79068	0.685954	0.000625161
LOC100300349	12876477	12.6379	0.109107	12.558	0.109107	13.0959	0.109107	12.4277	0.109107	7.09227	0.00535778	-1.05698	1.37364	-1.15683	1.45191	-1.09446	-1.58906	0.977691	0.158925	0.0194656	0.00500027
WHSC1L1	12825112	14.4369	0.0705097	14.41	0.0705097	14.5867	0.0705097	14.1362	0.0705097	7.08533	0.00537716	-1.01884	1.10936	-1.23178	1.13026	-1.20901	-1.36649	0.977691	0.39613	0.0109952	0.00541432
LOC521525	12860174	6.67909	0.097057	6.70168	0.097057	6.22767	0.097057	6.26127	0.097057	7.06514	0.00543405	1.01578	-1.36739	-1.33591	-1.38897	-1.35699	1.02357	0.977691	0.000616887	0.955682	0.777124
LOC100335833	12914709	6.7694	0.523066	6.70481	0.523066	9.54784	0.523066	6.83673	0.523066	7.05989	0.00544898	-1.04578	6.86114	1.04778	7.17525	1.09575	-6.54829	0.977691	0.0165882	0.0264277	0.0210504
NDEL1	12762713	13.6012	0.112339	13.698	0.112339	14.1241	0.112339	13.421	0.112339	7.05125	0.00547361	1.06936	1.43684	-1.13302	1.34364	-1.21161	-1.62797	0.977691	0.295098	0.00392486	0.0193584
TRAF6	12733099	10.7649	0.0555232	10.8124	0.0555232	10.969	0.0555232	10.6112	0.0555232	7.04642	0.00548746	1.03349	1.15199	-1.11246	1.11466	-1.14971	-1.28154	0.977691	0.979946	0.00332214	0.0162004
LOC618139	12827180	6.89663	0.0853159	6.495	0.0853159	6.88966	0.0853159	7.01277	0.0853159	7.02763	0.00554166	-1.321	-1.00484	1.08383	1.31463	1.43174	1.08908	0.977691	0.0111998	0.0096228	0.128562
LOC538864	12733065	5.71214	0.065231	6.04457	0.065231	6.04939	0.065231	6.07616	0.065231	7.02102	0.00556086	1.25913	1.26335	1.28701	1.00335	1.02214	1.01873	0.977691	0.0152547	0.0371851	0.0174959
LOC614978	12875634	7.60772	0.0543734	7.94634	0.0543734	7.69872	0.0543734	7.77289	0.0543734	6.96585	0.00572429	1.26455	1.06511	1.1213	-1.18725	-1.12776	1.05276	0.977691	0.462933	0.0316273	0.00254874
SP8	12856159	6.09665	0.0450484	6.09448	0.0450484	5.89514	0.0450484	6.17285	0.0450484	6.95677	0.00575174	-1.00151	-1.1499	1.05424	-1.14817	1.05582	1.21226	0.977691	0.196763	0.00908165	0.00993197
NAB1	12781710	10.9613	0.10043	10.8225	0.10043	11.2995	0.10043	10.6812	0.10043	6.95612	0.00575371	-1.10101	1.2642	-1.21426	1.39189	-1.10286	-1.53507	0.977691	0.346121	0.034316	0.0026747
LOC618052	12806868	6.88661	0.0818112	6.90232	0.0818112	7.15129	0.0818112	7.3367	0.0818112	6.94659	0.00578265	1.01095	1.20137	1.36612	1.18836	1.35133	1.13714	0.977691	0.00108348	0.32013	0.242577
TMEM209	12853801	10.632	0.122047	11.0581	0.122047	10.2774	0.122047	10.7274	0.122047	6.92377	0.00585272	1.34355	-1.27863	1.06834	-1.7179	-1.2576	1.36602	0.977691	0.0158249	0.923538	0.00372108
LONP2	12753547	10.8496	0.137719	10.7434	0.137719	10.0442	0.137719	10.6477	0.137719	6.86674	0.00603215	-1.07639	-1.74762	-1.15027	-1.62359	-1.06864	1.51931	0.977691	0.00668167	0.0242625	0.0961822
LOC789893	12748475	8.1691	0.104339	7.79788	0.104339	8.19481	0.104339	8.46293	0.104339	6.86275	0.00604494	-1.29345	1.01798	1.22589	1.31671	1.58563	1.20424	0.977691	0.00622231	0.00982944	0.630183
LOC784260	12911379	7.55474	0.0651826	7.56725	0.0651826	7.90352	0.0651826	7.78562	0.0651826	6.86036	0.0060526	1.00871	1.27349	1.17355	1.26249	1.16342	-1.08516	0.977691	0.000944021	0.33688	0.434572
	12912731	9.63044	0.14079	9.77462	0.14079	9.40148	0.14079	8.93233	0.14079	6.84998	0.00608607	1.1051	-1.17199	-1.62238	-1.29517	-1.79289	-1.38429	0.977691	0.00250952	0.0500603	0.270921
PLCD1	12797969	7.3703	0.0632329	7.21257	0.0632329	7.49336	0.0632329	7.59638	0.0632329	6.83414	0.00613758	-1.11553	1.08905	1.16966	1.21486	1.30479	1.07402	0.977691	0.00173645	0.0615742	0.672987
C27H8orf40	12824044	11.6703	0.0582261	11.7008	0.0582261	11.3906	0.0582261	11.4661	0.0582261	6.83212	0.0061442	1.02137	-1.21398	-1.15207	-1.23992	-1.17668	1.05374	0.977691	0.000838654	0.705792	0.380505
C19H17orf78	12765503	6.56319	0.113408	6.94667	0.113408	7.18532	0.113408	7.19509	0.113408	6.81737	0.00619264	1.30448	1.53915	1.5496	1.1799	1.18791	1.00679	0.977691	0.00236031	0.12534	0.108556
LOC520085	12908622	7.30245	0.0647786	7.56283	0.0647786	7.65852	0.0647786	7.35387	0.0647786	6.80886	0.00622083	1.1978	1.27993	1.03629	1.06857	-1.15586	-1.23512	0.977691	0.278351	0.000926312	0.738527
LOC100296197	12698060	8.16376	0.106979	8.30045	0.106979	8.11477	0.106979	7.65728	0.106979	6.80866	0.00622148	1.09938	-1.03454	-1.42058	-1.13735	-1.56176	-1.37316	0.977691	0.00715206	0.01674	0.159616
GABRB1	12870136	8.66404	0.151444	9.60919	0.151444	9.26508	0.151444	9.2926	0.151444	6.79111	0.00628007	1.9254	1.51682	1.54602	-1.26937	-1.24539	1.01925	0.977691	0.366187	0.0104735	0.00747378
EFNB3	12765609	7.12689	0.0771326	7.0078	0.0771326	7.17108	0.0771326	7.47952	0.0771326	6.7907	0.00628144	-1.08605	1.03111	1.27689	1.11983	1.38677	1.23837	0.977691	0.0058405	0.0169186	0.243189
LOC785883	12784684	6.46606	0.0744024	6.30319	0.0744024	6.62286	0.0744024	6.75025	0.0744024	6.77655	0.00632912	-1.11952	1.11481	1.21772	1.24804	1.36326	1.09232	0.977691	0.00158728	0.0748393	0.815568
IFNAR1	12683438	13.893	0.181934	13.9112	0.181934	14.8457	0.181934	13.8919	0.181934	6.77642	0.00632958	1.01271	1.93559	-1.00071	1.91129	-1.01343	-1.93697	0.977691	0.0247473	0.0203595	0.0244919
LOC539014	12723302	8.04833	0.0820959	7.74995	0.0820959	7.61242	0.0820959	7.58126	0.0820959	6.74547	0.00643538	-1.22976	-1.35277	-1.3823	-1.10002	-1.12404	-1.02183	0.977691	0.00313548	0.129585	0.0678135
LOC100335385	12703617	6.03439	0.154969	6.05225	0.154969	6.60296	0.154969	6.83563	0.154969	6.72032	0.00652289	1.01245	1.48305	1.7426	1.46481	1.72116	1.17501	0.977691	0.000925076	0.501447	0.434637
ABHD15	12915397	7.41561	0.0868706	7.13663	0.0868706	7.42659	0.0868706	7.68794	0.0868706	6.71869	0.00652859	-1.21333	1.00764	1.20776	1.22261	1.46541	1.1986	0.977691	0.0071344	0.00902209	0.92084
ZPLD1	12681142	6.96575	0.0591145	7.23438	0.0591145	7.31675	0.0591145	7.23329	0.0591145	6.6938	0.00661668	1.20466	1.27545	1.20375	1.05876	-1.00076	-1.05956	0.977691	0.0119286	0.0115259	0.143299
ATOH7	12828740	7.17551	0.0781477	7.30989	0.0781477	7.59287	0.0781477	7.1535	0.0781477	6.69053	0.00662835	1.09762	1.33548	-1.01538	1.21671	-1.11449	-1.35601	0.977691	0.120832	0.00320168	0.0747409
	12913341	5.69676	0.155922	5.70517	0.155922	6.47189	0.155922	5.60836	0.155922	6.6895	0.00663203	1.00585	1.71134	-1.06319	1.70139	-1.0694	-1.81948	0.977691	0.0503252	0.0161623	0.0178615
NLGN3	12907962	8.28691	0.0762417	8.05784	0.0762417	8.52726	0.0762417	8.38186	0.0762417	6.67687	0.00667734	-1.17208	1.18128	1.06803	1.38455	1.25181	-1.10604	0.977691	0.00302936	0.593285	0.0302698
CEP164	12727841	8.64489	0.054225	8.78268	0.054225	8.93929	0.054225	8.93257	0.054225	6.67299	0.00669133	1.10021	1.22637	1.22067	1.11467	1.10948	-1.00467	0.977691	0.00148107	0.207438	0.250145
LOC517202	12912231	6.36937	0.066423	6.60932	0.066423	6.25301	0.066423	6.23821	0.066423	6.67164	0.00669623	1.18095	-1.084	-1.09518	-1.28015	-1.29335	-1.01031	0.977691	0.00320983	0.0792653	0.115887
LOC615014	12697133	7.3726	0.138387	6.8791	0.138387	7.72325	0.138387	7.50069	0.138387	6.66364	0.00672521	-1.40785	1.27513	1.09285	1.7952	1.53857	-1.1668	0.977691	0.00428029	0.346937	0.0237828
LIPK	12819300	6.49542	0.0879172	6.16657	0.0879172	6.35587	0.0879172	6.70401	0.0879172	6.65196	0.00676781	-1.256	-1.10156	1.15556	1.14021	1.45139	1.27292	0.977691	0.0429879	0.00230974	0.914412
LOC533444	12886579	8.72335	0.0664267	8.49413	0.0664267	8.39326	0.0664267	8.73939	0.0664267	6.64537	0.00679198	-1.1722	-1.25709	1.01118	-1.07242	1.1853	1.27114	0.977691	0.53513	0.000977675	0.396164
CHEK2	12746880	8.42681	0.0552887	8.57232	0.0552887	8.28901	0.0552887	8.26374	0.0552887	6.62096	0.0068824	1.10612	-1.10022	-1.11967	-1.21698	-1.23848	-1.01767	0.977691	0.0016491	0.148439	0.298236
POU6F2	12854268	8.59347	0.107351	8.50477	0.107351	8.89353	0.107351	9.10482	0.107351	6.61795	0.00689364	-1.06341	1.23119	1.42538	1.30926	1.51576	1.15772	0.977691	0.00124882	0.187648	0.578536
PI15	12723002	11.5048	0.216852	10.1954	0.216852	10.6492	0.216852	10.5327	0.216852	6.60114	0.00695685	-2.47844	-1.80957	-1.96169	1.36963	1.26342	-1.08406	0.977691	0.255138	0.0175795	0.00648714
LOC518818	12746863	9.35294	0.108181	9.60422	0.108181	8.95318	0.108181	9.43742	0.108181	6.52424	0.00725468	1.19026	-1.31929	1.0603	-1.5703	-1.12257	1.39885	0.977691	0.0224429	0.302776	0.00527496
	12913969	5.04786	0.246938	6.16521	0.246938	5.02834	0.246938	4.73549	0.246938	6.517	0.00728348	2.16948	-1.01362	-1.24175	-2.19903	-2.69395	-1.22506	0.977691	0.0125008	0.0144776	0.12089
	12912245	9.7418	0.23317	8.79006	0.23317	9.99577	0.23317	10.0922	0.23317	6.51682	0.00728421	-1.9342	1.19248	1.27491	2.3065	2.46594	1.06913	0.977691	0.00592247	0.0441832	0.0915447
ZC3HAV1	12855735	15.1155	0.182664	15.0635	0.182664	15.9603	0.182664	14.9399	0.182664	6.51409	0.00729507	-1.03672	1.79605	-1.12945	1.862	-1.08945	-2.02855	0.977691	0.071831	0.0211466	0.0124726
BAG3	12821078	9.74936	0.294305	9.47434	0.294305	10.9287	0.294305	9.23694	0.294305	6.50639	0.0073259	-1.21001	2.26474	-1.42644	2.74035	-1.17887	-3.23051	0.977691	0.135518	0.0330973	0.00587287
LOC100337077	12788917	10.4465	0.0708346	10.4855	0.0708346	10.2724	0.0708346	10.7111	0.0708346	6.4887	0.00739732	1.02735	-1.1283	1.2013	-1.15916	1.16932	1.35543	0.977691	0.72241	0.0153958	0.0055521
HMCN2	12701411	8.09309	0.0722558	8.41848	0.0722558	8.09073	0.0722558	8.40135	0.0722558	6.46615	0.00748949	1.253	-1.00164	1.23821	-1.25506	-1.01194	1.24024	0.977691	0.894939	0.920294	0.000863699
MIR2300A	12711028	9.58716	0.117392	9.4872	0.117392	9.68373	0.117392	10.1605	0.117392	6.45397	0.00753989	-1.07174	1.06923	1.48796	1.14593	1.59471	1.39162	0.977691	0.00659189	0.0302368	0.134482
PTPLB	12686636	12.7665	0.119535	13.097	0.119535	12.4905	0.119535	12.4342	0.119535	6.45204	0.00754787	1.25751	-1.21081	-1.259	-1.52261	-1.58321	-1.0398	0.977691	0.0020096	0.131576	0.273635
UBE2CBP	12900255	9.38399	0.0561712	9.36524	0.0561712	9.15828	0.0561712	9.50107	0.0561712	6.43882	0.00760307	-1.01309	-1.16936	1.08453	-1.15425	1.09872	1.2682	0.977691	0.439206	0.00737853	0.0137205
TBC1D1	12870262	13.5269	0.117886	13.3513	0.117886	12.853	0.117886	13.0661	0.117886	6.43041	0.00763839	-1.12943	-1.59538	-1.3763	-1.41255	-1.21858	1.15918	0.977691	0.00155941	0.125137	0.876273
LOC785898	12882284	7.73364	0.135581	7.25957	0.135581	7.91021	0.135581	8.04765	0.135581	6.42757	0.00765035	-1.38903	1.13019	1.24316	1.56986	1.72678	1.09996	0.977691	0.00394206	0.0435873	0.238163
LOC516127	12838639	5.94934	0.0766805	5.9963	0.0766805	6.22227	0.0766805	6.36318	0.0766805	6.42685	0.00765341	1.03309	1.20826	1.33222	1.16956	1.28956	1.1026	0.977691	0.00129511	0.551559	0.244065
UBE2D3P	12870347	16.396	0.0967886	16.0842	0.0967886	16.6488	0.0967886	16.211	0.0967886	6.42298	0.00766979	-1.24132	1.19152	-1.13684	1.47905	1.09191	-1.35456	0.977691	0.0734741	0.527538	0.00221631
LOC789131	12741550	4.7452	0.0890967	5.11335	0.0890967	4.7172	0.0890967	4.58745	0.0890967	6.41981	0.0076832	1.2907	-1.0196	-1.11555	-1.31599	-1.43983	-1.09411	0.977691	0.00904759	0.0162187	0.205745
PSMD7	12756975	12.5165	0.108224	12.2851	0.108224	12.2194	0.108224	11.8548	0.108224	6.418	0.0076909	-1.17401	-1.22874	-1.58195	-1.04661	-1.34747	-1.28746	0.977691	0.00566641	0.550159	0.0174906
LOC100296271	12915021	7.83951	0.0643642	8.03027	0.0643642	7.70772	0.0643642	8.04858	0.0643642	6.39715	0.00778003	1.14137	-1.09565	1.15594	-1.25054	1.01277	1.26651	0.977691	0.395347	0.266281	0.00139611
LOC512248	12769833	12.615	0.134294	12.8371	0.134294	12.1055	0.134294	12.2285	0.134294	6.37206	0.00788889	1.16643	-1.42353	-1.30724	-1.66045	-1.52481	1.08896	0.977691	0.00131604	0.718446	0.22315
BOSTAUV1R430	12754924	7.62724	0.0797892	7.7596	0.0797892	7.57281	0.0797892	8.02413	0.0797892	6.36902	0.00790221	1.09608	-1.03845	1.31667	-1.13823	1.20125	1.3673	0.977691	0.212561	0.0687941	0.00328044
NUP37	12863408	9.27149	0.075163	9.46559	0.075163	9.01124	0.075163	9.32133	0.075163	6.36176	0.00793412	1.14402	-1.19768	1.03515	-1.37017	-1.10517	1.23978	0.977691	0.0196383	0.455331	0.00573759
LOC100301243	12901724	6.47815	0.0543533	6.80335	0.0543533	6.69674	0.0543533	6.70219	0.0543533	6.35681	0.00795594	1.25284	1.1636	1.16799	-1.0767	-1.07264	1.00378	0.977691	0.301294	0.0123381	0.0102432
MIR196A-1	12760456	7.72041	0.135677	7.17296	0.135677	7.91	0.135677	7.8767	0.135677	6.33613	0.00804792	-1.4615	1.14044	1.11442	1.66675	1.62872	-1.02335	0.977691	0.00643434	0.0824675	0.0535736
LOC100300004	12760438	5.92291	0.058333	6.13804	0.058333	5.95122	0.058333	6.22707	0.058333	6.33117	0.00807014	1.16081	1.01982	1.2347	-1.13825	1.06365	1.21071	0.977691	0.334344	0.612255	0.00121356
ATP2A2	12744231	13.5562	0.18122	13.0125	0.18122	14.0919	0.18122	13.3191	0.18122	6.33115	0.00807025	-1.45766	1.44967	-1.1786	2.11312	1.23677	-1.70858	0.977691	0.0384887	0.539087	0.00343686
LOC785701	12912781	7.58073	0.0787741	7.71298	0.0787741	7.9055	0.0787741	8.02615	0.0787741	6.32591	0.00809381	1.096	1.25246	1.36171	1.14276	1.24243	1.08722	0.977691	0.0016128	0.942519	0.134423
LOC787178	12888367	6.29567	0.080099	6.53376	0.080099	6.09037	0.080099	6.13054	0.080099	6.32442	0.00810053	1.17943	-1.15293	-1.12127	-1.35981	-1.32246	1.02824	0.977691	0.00253606	0.240297	0.10796
LOC100300257	12888821	8.39358	0.0769075	8.07798	0.0769075	8.48123	0.0769075	8.48905	0.0769075	6.31272	0.00815351	-1.24453	1.06264	1.06841	1.32249	1.32967	1.00543	0.977691	0.0070558	0.0572726	0.0685319
PARP4	12712820	12.6051	0.10462	12.6707	0.10462	12.1077	0.10462	12.6115	0.10462	6.28822	0.00826578	1.04654	-1.41162	1.00445	-1.47731	-1.04191	1.41789	0.977691	0.0207918	0.0581723	0.0185678
LOC100298923	12892452	7.25411	0.0728905	7.09889	0.0728905	7.3622	0.0728905	7.53322	0.0728905	6.28802	0.00826671	-1.11359	1.0778	1.21345	1.20023	1.35128	1.12586	0.977691	0.00292276	0.0449673	0.915444
LOC515578	12809743	7.70463	0.0643925	7.80649	0.0643925	8.03137	0.0643925	7.67524	0.0643925	6.28297	0.00829007	1.07316	1.25417	-1.02058	1.16868	-1.09524	-1.27999	0.977691	0.154926	0.00395122	0.0718088
LOC100295980	12713285	16.2809	0.0536656	16.2199	0.0536656	16.3536	0.0536656	16.039	0.0536656	6.28107	0.00829886	-1.04317	1.05172	-1.18251	1.09712	-1.13357	-1.24367	0.977691	0.333626	0.0358542	0.00438818
IRF2	12824864	14.0775	0.124073	14.438	0.124073	13.6776	0.124073	14.0339	0.124073	6.28076	0.00830029	1.28385	-1.31944	-1.03068	-1.69396	-1.32324	1.28016	0.977691	0.00708617	0.986932	0.0136107
AGFG1	12778120	15.4214	0.0639888	15.2105	0.0639888	15.1198	0.0639888	15.0531	0.0639888	6.27824	0.00831199	-1.15735	-1.23247	-1.29081	-1.06491	-1.11531	-1.04734	0.977691	0.00373693	0.282189	0.0509095
LOC787577	12794019	6.43806	0.0794432	5.99052	0.0794432	6.34837	0.0794432	6.35353	0.0794432	6.27654	0.0083199	-1.36372	-1.06414	-1.06035	1.28152	1.2861	1.00358	0.977691	0.111057	0.0146443	0.0165167
LOC790556	12914311	8.30749	0.0620243	8.25386	0.0620243	8.54301	0.0620243	8.55057	0.0620243	6.26333	0.00838166	-1.03787	1.17733	1.18352	1.22192	1.22834	1.00526	0.977691	0.00104929	0.630695	0.716824
MUTED	12801362	12.1469	0.121334	12.5275	0.121334	11.8074	0.121334	12.0098	0.121334	6.26264	0.00838488	1.30188	-1.2653	-1.09969	-1.64727	-1.43167	1.15059	0.977691	0.00412887	0.476787	0.0333745
MTERFD1	12722861	11.0537	0.0805807	10.6605	0.0805807	10.9459	0.0805807	10.6577	0.0805807	6.2573	0.00840999	-1.31333	-1.07758	-1.31583	1.21877	-1.00191	-1.22109	0.977691	0.505777	0.526798	0.00117202
LOC524160	12879814	6.70817	0.113118	6.51473	0.113118	7.18696	0.113118	6.78435	0.113118	6.24662	0.00846051	-1.14349	1.39357	1.05422	1.59354	1.20549	-1.3219	0.977691	0.0062465	0.373409	0.0217862
MOBKL3	12779616	11.1757	0.131591	11.2387	0.131591	11.6246	0.131591	10.8226	0.131591	6.23373	0.00852193	1.0446	1.36498	-1.2773	1.3067	-1.33427	-1.74349	0.977691	0.902807	0.00650234	0.0158068
LOC100296483	12737974	5.16422	0.061549	5.5384	0.061549	5.3843	0.061549	5.35718	0.061549	6.22542	0.00856181	1.2961	1.1648	1.14311	-1.11272	-1.13384	-1.01898	0.977691	0.75762	0.00682831	0.0154783
	12911775	5.53044	0.0686745	5.78157	0.0686745	5.41494	0.0686745	5.7281	0.0686745	6.19889	0.00869055	1.19014	-1.08335	1.14684	-1.28934	-1.03776	1.24243	0.977691	0.242186	0.659594	0.00145031
ENTPD6	12714489	9.7494	0.141167	10.0719	0.141167	9.2209	0.141167	9.63757	0.141167	6.19836	0.00869315	1.25048	-1.44244	-1.0806	-1.80374	-1.35127	1.33485	0.977691	0.00517102	0.744423	0.0224664
MRTO4	12781070	11.0783	0.161354	10.8739	0.161354	10.1433	0.161354	10.7262	0.161354	6.19441	0.00871253	-1.15219	-1.91186	-1.27635	-1.65933	-1.10776	1.49791	0.977691	0.00572901	0.0311728	0.26351
	12910953	5.32357	0.0735082	5.51741	0.0735082	5.08167	0.0735082	5.38682	0.0735082	6.17093	0.00882869	1.1438	-1.18255	1.04481	-1.35261	-1.09475	1.23554	0.977691	#N/A	#N/A	#N/A
CMTM5	12694413	7.63167	0.0866561	7.99483	0.0866561	7.54742	0.0866561	7.54023	0.0866561	6.15066	0.00893041	1.28624	-1.06014	-1.06544	-1.36359	-1.37041	-1.005	0.977691	0.00903445	0.0538857	0.0624407
LOC513114	12727718	5.05999	0.108678	5.69236	0.108678	5.50994	0.108678	5.33624	0.108678	6.13091	0.00903089	1.55011	1.366	1.21104	-1.13478	-1.27998	-1.12795	0.977691	0.673605	0.00298864	0.0565127
FBXL14	12866853	10.6981	0.103745	10.7048	0.103745	11.0134	0.103745	10.3855	0.103745	6.10501	0.00916459	1.00469	1.24425	-1.24192	1.23844	-1.24775	-1.54526	0.977691	0.984748	0.00992734	0.0112033
LOC100296950	12788651	8.23664	0.0777435	8.62508	0.0777435	8.38742	0.0777435	8.20422	0.0777435	6.0917	0.00923418	1.30897	1.11016	-1.02273	-1.17908	-1.33872	-1.1354	0.977691	0.107956	0.0031699	0.211478
UPRT	12909948	8.93861	0.0836059	8.70021	0.0836059	9.16255	0.0836059	8.76811	0.0836059	6.08031	0.00929427	-1.17969	1.16792	-1.12545	1.37778	1.04819	-1.31443	0.977691	0.106447	0.369128	0.00260134
DPYSL4	12819517	7.89058	0.0791807	7.79029	0.0791807	8.12473	0.0791807	8.20704	0.0791807	6.07884	0.00930204	-1.07199	1.17621	1.24527	1.26089	1.33492	1.05871	0.977691	0.00144566	0.271331	0.91142
LOC100138651	12823362	5.79968	0.0460534	5.68229	0.0460534	5.91234	0.0460534	5.67066	0.0460534	6.0737	0.00932929	-1.08477	1.08122	-1.09355	1.17287	-1.00809	-1.18236	0.977691	0.294218	0.20213	0.00211635
	12726857	16.8524	0.160721	16.24	0.160721	17.1962	0.160721	16.7805	0.160721	6.05808	0.00941278	-1.52883	1.26912	-1.05108	1.94026	1.45453	-1.33395	0.977691	0.017561	0.551953	0.00765424
MGC137030	12882099	7.66999	0.0504947	7.53305	0.0504947	7.82268	0.0504947	7.60028	0.0504947	6.03949	0.00951322	-1.09957	1.11164	-1.04951	1.22232	1.0477	-1.16667	0.977691	0.0501105	0.413996	0.00393707
LOC784434	12895964	5.79976	0.133602	5.35479	0.133602	5.97073	0.133602	6.11041	0.133602	6.03936	0.00951394	-1.36129	1.12581	1.24027	1.53255	1.68836	1.10166	0.977691	0.00465036	0.0491793	0.275522
HSPA1A	12804546	14.7343	0.447216	14.5266	0.447216	16.9478	0.447216	15.2539	0.447216	6.03056	0.00956193	-1.15485	4.63807	1.43351	5.35626	1.65548	-3.23547	0.977691	0.00648492	0.122455	0.0549329
HSPA1A	12804579	14.7343	0.447216	14.5266	0.447216	16.9478	0.447216	15.2539	0.447216	6.03056	0.00956193	-1.15485	4.63807	1.43351	5.35626	1.65548	-3.23547	0.977691	0.00648492	0.122455	0.0549329
SFRS7	12704532	13.0724	0.172224	12.5511	0.172224	13.5326	0.172224	12.7844	0.172224	6.02458	0.00959474	-1.43525	1.3758	-1.22093	1.97462	1.17554	-1.67975	0.977691	0.0670281	0.522415	0.00311586
LOC782799	12882219	8.51871	0.217296	9.12298	0.217296	9.31415	0.217296	9.80818	0.217296	6.01957	0.00962229	1.52021	1.73561	2.4444	1.14169	1.60793	1.40838	0.977691	0.0052021	0.80405	0.0265552
MIR30F	12899212	6.85795	0.0579032	6.53421	0.0579032	6.6918	0.0579032	6.5907	0.0579032	6.01699	0.00963649	-1.25157	-1.12205	-1.20351	1.11543	1.03993	-1.0726	0.977691	0.362388	0.0786052	0.0032152
	12771675	18.0203	0.103972	17.8452	0.103972	18.1455	0.103972	17.5575	0.103972	6.006	0.00969738	-1.12908	1.09064	-1.37819	1.23142	-1.22063	-1.50311	0.977691	0.449812	0.070466	0.00320856
LSM12	12772043	12.9649	0.134141	13.0613	0.134141	12.4865	0.134141	12.4161	0.134141	5.97997	0.00984341	1.06916	-1.3932	-1.46289	-1.48955	-1.56406	-1.05003	0.977691	0.00125737	0.545512	0.924251
LOC100140621	12794167	6.61564	0.0613676	6.82204	0.0613676	6.69034	0.0613676	6.95607	0.0613676	5.97452	0.00987427	1.15381	1.05314	1.26614	-1.09559	1.09735	1.20224	0.977691	0.114754	0.637541	0.0023237
LOC528374	12802629	6.61605	0.0879688	6.59139	0.0879688	7.05621	0.0879688	6.8015	0.0879688	5.96387	0.00993498	-1.01724	1.35675	1.13717	1.38015	1.15677	-1.1931	0.977691	0.00305806	0.215518	0.13829
ERC1	12859963	11.0175	0.10531	10.7142	0.10531	10.8397	0.10531	10.407	0.10531	5.96384	0.00993517	-1.23394	-1.13114	-1.52679	1.09089	-1.23733	-1.34978	0.977691	0.0399994	0.550285	0.00442688
LOC100335526	12915347	11.0597	0.181302	10.5154	0.181302	11.5875	0.181302	11.1853	0.181302	5.9592	0.00996172	-1.45836	1.44168	1.09098	2.10249	1.59105	-1.32145	0.977691	0.00630428	0.701764	0.0227928
LOC525702	12834206	7.81037	0.0752493	7.96164	0.0752493	7.91381	0.0752493	8.24018	0.0752493	5.95583	0.00998107	1.11054	1.07433	1.34705	-1.03371	1.21296	1.25385	0.977691	0.0260324	0.267254	0.00801465
PPM1D	12770219	12.2331	0.190491	12.1559	0.190491	13.1044	0.190491	12.1453	0.190491	5.95471	0.00998753	-1.05497	1.82941	-1.06277	1.92997	-1.00739	-1.94423	0.977691	0.0432664	0.0391155	0.0185963
PRODH2	12756569	6.91594	0.0708383	6.86853	0.0708383	6.86576	0.0708383	7.22603	0.0708383	5.95406	0.00999128	-1.03341	-1.03539	1.23979	-1.00192	1.28121	1.28367	0.977691	0.0508675	0.013893	0.0474306
LECT2	12883220	5.84957	0.0926612	6.05615	0.0926612	6.21141	0.0926612	6.38052	0.0926612	5.95372	0.00999323	1.15395	1.28506	1.44488	1.11362	1.25212	1.12437	0.977691	0.00302033	0.843178	0.0654476
ECHDC2	12838322	6.69808	0.0773704	7.08378	0.0773704	6.84094	0.0773704	7.07638	0.0773704	5.94083	0.0100678	1.3065	1.10409	1.29981	-1.18332	-1.00514	1.17727	0.977691	0.39854	0.350693	0.00171748
NUFIP2	12773281	13.7231	0.15512	14.1448	0.15512	14.3825	0.15512	13.5606	0.15512	5.93044	0.0101283	1.33953	1.57943	-1.11922	1.17909	-1.49923	-1.76773	0.977691	0.81263	0.00173468	0.221394
	12913243	7.69671	0.179913	6.89902	0.179913	7.44901	0.179913	7.9149	0.179913	5.91322	0.0102296	-1.73832	-1.18731	1.16327	1.46408	2.02214	1.38116	0.977691	0.0540828	0.00428892	0.374626
	12912001	6.78902	0.050281	6.60788	0.050281	6.84619	0.050281	6.61194	0.050281	5.90394	0.0102847	-1.13378	1.04042	-1.1306	1.17961	1.00282	-1.17629	0.977691	0.554005	0.60712	0.00139385
AMD1	12899433	12.1349	0.144809	11.584	0.144809	12.3077	0.144809	11.6712	0.144809	5.89964	0.0103103	-1.46492	1.12722	-1.37907	1.6513	1.06225	-1.55453	0.977691	0.387162	0.772488	0.0014736
LOC100299729	12741751	7.29909	0.056759	7.30458	0.056759	7.42329	0.056759	7.59294	0.056759	5.89333	0.0103481	1.00381	1.0899	1.22591	1.08576	1.22125	1.12479	0.977691	0.00342354	0.173754	0.148808
C24H18ORF10	12808574	10.5748	0.138031	10.8222	0.138031	10.0426	0.138031	10.3195	0.138031	5.89063	0.0103643	1.18705	-1.44614	-1.19363	-1.71664	-1.41689	1.21156	0.977691	0.00277645	0.916708	0.0818696
TBX21	12772164	11.4863	0.151733	11.681	0.151733	10.8266	0.151733	11.2457	0.151733	5.88655	0.0103888	1.14451	-1.57978	-1.18148	-1.80807	-1.35222	1.33712	0.977691	0.00358961	0.473847	0.0659592
PRDM13	12900011	6.78737	0.0742421	7.14429	0.0742421	6.84121	0.0742421	6.74812	0.0742421	5.8858	0.0103933	1.28068	1.03802	-1.02759	-1.23378	-1.31601	-1.06665	0.977691	0.0397934	0.0104541	0.100941
PAGE4	12903340	7.81051	0.0902537	7.66066	0.0902537	8.07774	0.0902537	8.11795	0.0902537	5.86277	0.0105332	-1.10945	1.2035	1.23751	1.33522	1.37296	1.02826	0.977691	0.00171843	0.31313	0.554906
	12913123	7.47127	0.42569	7.23196	0.42569	6.61938	0.42569	5.1752	0.42569	5.86146	0.0105413	-1.18043	-1.80486	-4.91116	-1.52898	-4.16049	-2.72108	0.977691	0.00511267	0.182436	0.0714317
CLDN15	12812592	8.21129	0.0793562	8.25051	0.0793562	8.58642	0.0793562	8.53323	0.0793562	5.84243	0.0106586	1.02756	1.29695	1.25001	1.26217	1.21649	-1.03755	0.977691	0.00135877	0.571218	0.931336
	12912105	8.56604	0.0619629	8.42742	0.0619629	8.65525	0.0619629	8.78304	0.0619629	5.83794	0.0106865	-1.10085	1.06379	1.16231	1.17108	1.27954	1.09262	0.977691	0.00371666	0.0526662	0.931771
OCA2	12782354	7.63637	0.0596915	7.55609	0.0596915	7.79082	0.0596915	7.87371	0.0596915	5.83481	0.010706	-1.05722	1.113	1.17882	1.17669	1.24627	1.05914	0.977691	0.00191314	0.196762	0.982933
LOC787171	12914625	10.6917	0.266155	10.4498	0.266155	11.8364	0.266155	10.557	0.266155	5.83261	0.0107197	-1.18255	2.211	-1.09788	2.61462	1.07712	-2.42742	0.977691	0.0365942	0.0750454	0.0144081
COL12A1	12899625	10.2559	0.243834	9.24784	0.243834	10.5822	0.243834	9.72187	0.243834	5.82137	0.0107902	-2.01117	1.25384	-1.44794	2.52168	1.38899	-1.81548	0.977691	0.126675	0.767198	0.00239001
IGJ	12873147	19.5397	0.0497819	19.6006	0.0497819	19.3396	0.0497819	19.5825	0.0497819	5.81892	0.0108057	1.0431	-1.1488	1.03011	-1.19831	-1.01261	1.18339	0.977691	0.048871	0.0924282	0.0100602
LOC525414	12802426	6.4991	0.0332769	6.5735	0.0332769	6.52931	0.0332769	6.68238	0.0332769	5.81534	0.0108283	1.05292	1.02116	1.13546	-1.0311	1.07839	1.11193	0.977691	0.0585906	0.260093	0.00509922
NFATC4	12697841	6.52092	0.0640771	6.88691	0.0640771	6.67397	0.0640771	6.76733	0.0640771	5.81384	0.0108378	1.28877	1.11192	1.18625	-1.15905	-1.08642	1.06685	0.977691	0.798375	0.0548141	0.00375203
LOC788872	12734017	7.03492	0.0685459	7.04978	0.0685459	7.36584	0.0685459	7.02378	0.0685459	5.80719	0.0108799	1.01036	1.25781	-1.00775	1.24492	-1.01819	-1.26757	0.977691	0.0460933	0.0230752	0.0343408
SUCLA2	12711732	10.7322	0.123744	10.2939	0.123744	10.9184	0.123744	10.3628	0.123744	5.80595	0.0108878	-1.35498	1.13784	-1.29179	1.54176	1.04892	-1.46986	0.977691	0.3228	0.643754	0.00171123
TDP1	12689601	8.81952	0.0825083	8.60595	0.0825083	8.34141	0.0825083	8.51778	0.0825083	5.80372	0.010902	-1.15956	-1.39292	-1.23263	-1.20125	-1.06302	1.13004	0.977691	0.00497044	0.0358509	0.825437
RWDD2A	12898542	8.72296	0.11524	8.66056	0.11524	8.10984	0.11524	8.56522	0.11524	5.80091	0.0109199	-1.0442	-1.52957	-1.11554	-1.46482	-1.06832	1.37115	0.977691	0.00964759	0.044273	0.113908
	12913729	4.17372	0.100346	4.69992	0.100346	4.38254	0.100346	4.20328	0.100346	5.80056	0.0109221	1.44014	1.15574	1.0207	-1.24607	-1.41093	-1.1323	0.977691	0.177072	0.00426117	0.109475
CYTH4	12859830	12.3403	0.176907	13.0196	0.176907	12.0005	0.176907	12.3641	0.176907	5.79958	0.0109284	1.60142	-1.26556	1.01667	-2.02669	-1.57516	1.28665	0.977691	0.0156623	0.38975	0.0121938
LOC100335238	12693202	8.49837	0.0725389	8.29931	0.0725389	8.5231	0.0725389	8.72634	0.0725389	5.7954	0.0109551	-1.14795	1.01729	1.17118	1.1678	1.34446	1.15128	0.977691	0.00895631	0.0168696	0.977502
LOC786718	12906215	6.89268	0.0774825	6.77237	0.0774825	6.51961	0.0774825	6.9339	0.0774825	5.78774	0.0110043	-1.08697	-1.2951	1.02899	-1.19148	1.11847	1.33264	0.977691	0.197289	0.0048068	0.0821414
CA3	12725168	7.76941	0.112291	7.72283	0.112291	7.65828	0.112291	8.24907	0.112291	5.78088	0.0110487	-1.03281	-1.08007	1.39442	-1.04576	1.44016	1.50607	0.977691	0.0893334	0.0149525	0.0321269
F2	12726595	7.0543	0.0831483	6.82353	0.0831483	7.04083	0.0831483	7.31211	0.0831483	5.77878	0.0110623	-1.17347	-1.00938	1.19566	1.16256	1.40307	1.20688	0.977691	0.0144339	0.0106821	0.8117
MIR409	12788854	6.11245	0.110445	6.03301	0.110445	6.44104	0.110445	5.79929	0.110445	5.77485	0.0110877	-1.05661	1.25579	-1.24243	1.32687	-1.17586	-1.56022	0.977691	0.675178	0.02567	0.00676657
LOC781580	12906018	15.2452	0.0666987	14.962	0.0666987	15.3285	0.0666987	15.243	0.0666987	5.76408	0.011158	-1.21689	1.05942	-1.00153	1.2892	1.21504	-1.06104	0.977691	0.0182411	0.164058	0.01716
LOC788962	12697875	4.85729	0.127041	5.30328	0.127041	5.35504	0.127041	4.75746	0.127041	5.75381	0.0112254	1.36225	1.41201	-1.07165	1.03653	-1.45986	-1.51318	0.977691	0.853098	0.00145335	0.561842
DHX32	12822648	10.182	0.0519462	10.0231	0.0519462	9.89727	0.0519462	9.94561	0.0519462	5.75372	0.011226	-1.11638	-1.21814	-1.178	-1.09116	-1.0552	1.03408	0.977691	0.0044941	0.0693743	0.308539
GNG8	12759604	7.11034	0.0836047	7.05888	0.0836047	7.42664	0.0836047	7.43319	0.0836047	5.75047	0.0112474	-1.03632	1.24513	1.2508	1.29035	1.29622	1.00455	0.977691	0.00139491	0.73463	0.792788
IVNS1ABP	12739578	14.2313	0.125414	13.6679	0.125414	14.2933	0.125414	13.8519	0.125414	5.74915	0.0112562	-1.47775	1.04393	-1.30082	1.54267	1.13601	-1.35797	0.977691	0.346074	0.635589	0.00174234
LOC506323	12884008	8.94901	0.110436	9.39803	0.110436	9.0222	0.110436	9.47756	0.110436	5.74804	0.0112635	1.36511	1.05204	1.44247	-1.29758	1.05667	1.37112	0.977691	0.502453	0.977581	0.00148683
STEAP2	12849526	6.62894	0.0825284	6.67666	0.0825284	6.45817	0.0825284	6.93628	0.0825284	5.7462	0.0112757	1.03363	-1.12566	1.23743	-1.16352	1.19717	1.39292	0.977691	0.600182	0.0229052	0.00783595
LOC100337428	12713521	16.2662	0.0575867	16.1686	0.0575867	16.4425	0.0575867	16.135	0.0575867	5.74177	0.0113051	-1.07001	1.12994	-1.09522	1.20905	-1.02356	-1.23754	0.977691	0.239187	0.093452	0.00424442
LUZP1	12776740	9.61422	0.11473	9.80014	0.11473	10.0583	0.11473	9.41242	0.11473	5.74	0.0113169	1.13754	1.36046	-1.15013	1.19597	-1.30832	-1.56471	0.977691	0.810077	0.00348207	0.0680999
SLC15A2	12679276	6.23714	0.120318	6.71107	0.120318	6.83315	0.120318	6.8533	0.120318	5.7278	0.0113984	1.38888	1.51153	1.53278	1.08831	1.10361	1.01406	0.977691	0.0097552	0.0837635	0.0625206
GSTM1	12847474	7.09767	0.111529	7.22856	0.111529	7.04357	0.111529	7.63316	0.111529	5.71037	0.011516	1.09497	-1.03821	1.44944	-1.1368	1.32373	1.50482	0.977691	0.14207	0.0621638	0.00721915
DAB2	12785383	11.198	0.130016	10.7223	0.130016	11.4534	0.130016	10.9867	0.130016	5.70991	0.0115192	-1.39054	1.19369	-1.15767	1.65988	1.20116	-1.3819	0.977691	0.0687543	0.972959	0.00349027
LOC509457	12914805	8.49922	0.0824753	8.09403	0.0824753	8.07095	0.0824753	8.19667	0.0824753	5.70899	0.0115254	-1.32427	-1.34561	-1.23332	-1.01612	1.07374	1.09105	0.977691	0.0718479	0.00737361	0.115975
LOC100298877	12901703	5.94011	0.0668817	5.72706	0.0668817	5.56496	0.0668817	5.65652	0.0668817	5.70434	0.0115571	-1.15914	-1.29698	-1.21722	-1.11892	-1.05011	1.06553	0.977691	0.00597593	0.0418847	0.381646
SELT	12687219	14.9944	0.104648	15.0438	0.104648	14.5306	0.104648	15.0457	0.104648	5.69827	0.0115985	1.0348	-1.37917	1.0362	-1.42716	1.00135	1.42909	0.977691	0.0475625	0.0459963	0.0194203
LOC100297600	12856379	6.21056	0.0769458	6.23982	0.0769458	6.61193	0.0769458	6.38537	0.0769458	5.67911	0.0117305	1.02049	1.32076	1.12881	1.29424	1.10615	-1.17005	0.977691	0.00396822	0.12232	0.224016
LOC615216	12729942	5.42694	0.154153	5.8533	0.154153	6.31274	0.154153	5.98857	0.154153	5.66812	0.0118071	1.34385	1.84779	1.47593	1.375	1.09829	-1.25195	0.977691	0.00620334	0.0314789	0.746005
LRRC50	12752279	7.485	0.100927	7.45074	0.100927	7.94728	0.100927	7.78721	0.100927	5.65801	0.011878	-1.02403	1.37772	1.23304	1.41083	1.26267	-1.11734	0.977691	0.00190323	0.544755	0.354686
F5	12738397	9.98026	0.102381	10.1149	0.102381	9.54457	0.102381	9.87473	0.102381	5.65321	0.0119118	1.09783	-1.35256	-1.07589	-1.48487	-1.18114	1.25715	0.977691	0.00633166	0.358516	0.0424387
LOC784769	12869241	11.0357	0.184329	10.986	0.184329	11.7447	0.184329	10.7195	0.184329	5.64863	0.0119442	-1.03503	1.63476	-1.24503	1.69202	-1.20289	-2.03531	0.977691	0.253106	0.0213245	0.0129413
CRLF3	12763990	13.2449	0.105484	12.815	0.105484	13.2055	0.105484	12.7711	0.105484	5.64689	0.0119566	-1.34716	-1.02772	-1.38879	1.31082	-1.0309	-1.35133	0.977691	0.699713	0.983518	0.0014807
MAFK	12818496	8.20978	0.073746	8.13532	0.073746	8.36407	0.073746	7.94224	0.073746	5.6459	0.0119635	-1.05297	1.11287	-1.20375	1.17182	-1.1432	-1.33962	0.977691	0.797052	0.0363721	0.00562394
MAX	12696869	14.7975	0.159002	14.5309	0.159002	14.1682	0.159002	13.9468	0.159002	5.64431	0.0119748	-1.20301	-1.54681	-1.80334	-1.28579	-1.49903	-1.16584	0.977691	0.00245982	0.889149	0.150805
LOC100336920	12730634	11.3625	0.244389	10.69	0.244389	9.94442	0.244389	10.5885	0.244389	5.64166	0.0119937	-1.59391	-2.67234	-1.71006	-1.6766	-1.07287	1.56272	0.977691	0.00903855	0.0195355	0.954439
YRDC	12837912	7.44235	0.0549525	7.33989	0.0549525	7.56029	0.0549525	7.63579	0.0549525	5.61992	0.0121496	-1.0736	1.08518	1.14348	1.16505	1.22765	1.05373	0.977691	0.00269466	0.131361	0.810384
PCDHB2	12881851	7.83716	0.0766886	7.61452	0.0766886	7.71869	0.0766886	8.0381	0.0766886	5.61491	0.0121858	-1.16687	-1.08559	1.14944	1.07487	1.34124	1.24782	0.977691	0.0699695	0.00411525	0.539939
EXPH5	12732525	7.04582	0.0645409	7.01292	0.0645409	7.35217	0.0645409	7.12644	0.0645409	5.60878	0.0122303	-1.02307	1.23657	1.05747	1.2651	1.08186	-1.16937	0.977691	0.00692185	0.161029	0.068214
BMP8B	12848331	4.50838	0.119596	5.13427	0.119596	4.57552	0.119596	4.66294	0.119596	5.60571	0.0122527	1.54317	1.04764	1.11308	-1.473	-1.38639	1.06247	0.977691	0.116849	0.0438989	0.0114389
SLC16A3	12769290	6.98747	0.0788574	6.89678	0.0788574	7.06769	0.0788574	7.33	0.0788574	5.5974	0.0123136	-1.06488	1.05718	1.26798	1.12576	1.35025	1.1994	0.977691	0.00688609	0.0449372	0.297874
RPE65	12836003	5.78333	0.0425581	5.94189	0.0425581	5.88354	0.0425581	6.02254	0.0425581	5.59646	0.0123205	1.11617	1.07193	1.18035	-1.04127	1.05749	1.10114	0.977691	0.0550566	0.82207	0.00441487
C15H11orf71	12733529	6.95623	0.0763282	6.92943	0.0763282	6.83814	0.0763282	6.56137	0.0763282	5.59227	0.0123513	-1.01875	-1.0853	-1.31481	-1.06532	-1.29061	-1.21147	0.977691	0.00785455	0.127487	0.0700451
LNX2	12709937	10.2357	0.0895132	10.1808	0.0895132	9.86408	0.0895132	9.82619	0.0895132	5.57853	0.012453	-1.03879	-1.29382	-1.32826	-1.24551	-1.27867	-1.02662	0.977691	0.00159072	0.925915	0.613632
MIR30E	12848395	6.30444	0.118444	6.33343	0.118444	6.19147	0.118444	5.7307	0.118444	5.57491	0.0124799	1.0203	-1.08145	-1.48838	-1.1034	-1.51858	-1.37628	0.977691	0.0106389	0.0609577	0.0933366
TCF23	12708137	7.29061	0.0944717	7.1575	0.0944717	7.45932	0.0944717	7.67392	0.0944717	5.57365	0.0124893	-1.09665	1.12405	1.30433	1.23269	1.43039	1.16038	0.977691	0.00347565	0.0905835	0.673874
DDIT3	12862848	9.58599	0.138712	9.30251	0.138712	10.0585	0.138712	9.44954	0.138712	5.57133	0.0125066	-1.21713	1.38756	-1.0992	1.68885	1.10729	-1.5252	0.977691	0.0453362	0.263424	0.0073949
MIR2329-2	12749030	4.59885	0.0821618	4.90574	0.0821618	4.50473	0.0821618	4.48967	0.0821618	5.54428	0.0127107	1.23704	-1.06742	-1.07862	-1.32044	-1.33429	-1.01049	0.977691	0.00910755	0.0737295	0.101077
C23H6orf136	12806452	8.95833	0.0792749	8.5961	0.0792749	8.55245	0.0792749	8.78583	0.0792749	5.54388	0.0127137	-1.28542	-1.3249	-1.12701	-1.03072	1.14055	1.17559	0.977691	0.197816	0.00273753	0.432204
TNFRSF13B	12765636	8.41226	0.0499071	8.3447	0.0499071	8.16038	0.0499071	8.20665	0.0499071	5.5357	0.0127762	-1.04794	-1.19076	-1.15317	-1.13628	-1.10041	1.03259	0.977691	0.00208529	0.276352	0.834658
EFCAB6	12861238	5.24975	0.0779928	5.15902	0.0779928	5.33659	0.0779928	5.58524	0.0779928	5.52566	0.0128533	-1.0649	1.06204	1.26181	1.13097	1.3437	1.18809	0.977691	0.00646968	0.0502825	0.331303
PRKAR1B	12811788	8.96986	0.126402	8.39838	0.126402	8.41313	0.126402	8.32982	0.126402	5.51842	0.0129093	-1.48605	-1.47093	-1.55837	1.01028	-1.04867	-1.05944	0.977691	0.0293099	0.0774425	0.0236535
ABCA13	12854632	6.46604	0.0691964	6.41967	0.0691964	6.6884	0.0691964	6.7492	0.0691964	5.50456	0.0130173	-1.03266	1.16664	1.21686	1.20475	1.25661	1.04305	0.977691	0.00180059	0.453678	0.918665
CXHXORF15	12908402	12.5014	0.0875167	12.4045	0.0875167	12.4915	0.0875167	12.0645	0.0875167	5.50396	0.013022	-1.06949	-1.00692	-1.35372	1.06214	-1.26576	-1.34441	0.977691	0.0687354	0.0837779	0.0112086
LOC100336736	12821282	6.6409	0.0799106	6.82163	0.0799106	6.85579	0.0799106	7.0967	0.0799106	5.50007	0.0130525	1.13346	1.16062	1.37154	1.02396	1.21005	1.18173	0.977691	0.00979517	0.71313	0.0216456
LOC100296121	12755259	8.90607	0.0689037	9.15162	0.0689037	8.99077	0.0689037	8.76523	0.0689037	5.49978	0.0130548	1.18554	1.06047	-1.10254	-1.11794	-1.30711	-1.16922	0.977691	0.0490833	0.00509297	0.886989
FAM175B	12819425	10.6779	0.0673676	10.6665	0.0673676	10.3466	0.0673676	10.4896	0.0673676	5.49971	0.0130554	-1.00792	-1.25819	-1.1394	-1.24831	-1.13045	1.10426	0.977691	0.00266103	0.274006	0.34763
ANKRD1	12821871	6.97326	0.0793577	6.5998	0.0793577	6.92671	0.0793577	7.00085	0.0793577	5.49959	0.0130563	-1.29546	-1.03279	1.01931	1.25432	1.32047	1.05274	0.977691	0.0453196	0.0154549	0.0837416
USPL1	12713136	11.0561	0.150578	10.939	0.150578	11.6685	0.150578	10.9223	0.150578	5.49898	0.013061	-1.08455	1.52888	-1.09716	1.65815	-1.01163	-1.67743	0.977691	0.0713049	0.0586665	0.0141739
	12915635	4.14934	0.0222319	4.23892	0.0222319	4.14266	0.0222319	4.12098	0.0222319	5.48248	0.0131915	1.06406	-1.00464	-1.01985	-1.069	-1.08518	-1.01514	0.977691	0.0159665	0.0278054	0.152658
LOC506121	12727124	7.70676	0.0838246	7.83651	0.0838246	8.14941	0.0838246	7.77253	0.0838246	5.46886	0.0133003	1.0941	1.35909	1.04664	1.2422	-1.04535	-1.29853	0.977691	0.0433178	0.0106243	0.166198
LOC789689	12906264	7.55118	0.143595	8.06427	0.143595	7.27069	0.143595	7.4923	0.143595	5.46176	0.0133574	1.4271	-1.21461	-1.04165	-1.73337	-1.48655	1.16604	0.977691	0.0117389	0.330175	0.0250824
RCL1	12895609	10.4329	0.104641	10.3169	0.104641	9.87081	0.104641	10.2721	0.104641	5.45854	0.0133834	-1.08376	-1.4764	-1.11794	-1.36229	-1.03154	1.32064	0.977691	0.0133304	0.029399	0.197997
GTF3C6	12900439	8.97178	0.0569548	8.75121	0.0569548	8.77385	0.0569548	8.65468	0.0569548	5.45675	0.0133979	-1.16519	-1.14705	-1.24582	1.01582	-1.0692	-1.08611	0.977691	0.0238755	0.39089	0.0114317
LOC790217	12914297	8.20082	0.072408	8.09923	0.072408	8.04714	0.072408	7.80309	0.072408	5.43764	0.0135536	-1.07296	-1.1124	-1.31744	-1.03677	-1.22786	-1.18432	0.977691	0.00908505	0.344651	0.0343357
SNAI3	12758127	6.03164	0.0845293	6.25868	0.0845293	5.82341	0.0845293	6.20815	0.0845293	5.43618	0.0135655	1.17043	-1.15527	1.13014	-1.35217	-1.03565	1.30563	0.977691	0.151782	0.369306	0.00352248
LOC100295064	12892359	7.07663	0.104229	7.57782	0.104229	7.1439	0.104229	7.46321	0.104229	5.43482	0.0135768	1.41537	1.04773	1.30728	-1.35089	-1.08268	1.24773	0.977691	0.824163	0.400065	0.00197733
LUC7L	12817877	10.9205	0.0932313	10.5364	0.0932313	11.0331	0.0932313	10.7405	0.0932313	5.43284	0.0135931	-1.30509	1.08116	-1.1329	1.41101	1.15199	-1.22485	0.977691	0.115175	0.632294	0.00345442
TSLP	12697370	6.40648	0.0593338	6.64505	0.0593338	6.71887	0.0593338	6.51786	0.0593338	5.4193	0.013705	1.17983	1.24177	1.08027	1.0525	-1.09216	-1.1495	0.977691	0.144566	0.00301201	0.756957
SPEN	12739415	11.5456	0.147541	11.5154	0.147541	12.1317	0.147541	11.3445	0.147541	5.41115	0.013773	-1.02114	1.50118	-1.14955	1.53291	-1.12576	-1.72569	0.977691	0.184777	0.0247548	0.0169648
SLK	12820519	12.3525	0.337647	12.5846	0.337647	14.0061	0.337647	12.4093	0.337647	5.40374	0.013835	1.17458	3.14623	1.04017	2.67859	-1.12922	-3.02472	0.977691	0.0490855	0.0190126	0.0661892
SLC12A8	12685005	5.63308	0.060223	5.38045	0.060223	5.69806	0.060223	5.62796	0.060223	5.4025	0.0138454	-1.19138	1.04607	-1.00355	1.24627	1.18716	-1.04979	0.977691	0.0234623	0.155542	0.0200577
LOC781880	12911643	13.0226	0.140789	12.7533	0.140789	13.2658	0.140789	13.5168	0.140789	5.40083	0.0138595	-1.20518	1.18368	1.40861	1.42654	1.69763	1.19003	0.977691	0.00381328	0.0894452	0.94939
TRIAP1	12746973	10.7546	0.116234	10.3853	0.116234	10.9372	0.116234	10.9769	0.116234	5.39849	0.0138792	-1.29166	1.13499	1.16661	1.46602	1.50687	1.02786	0.977691	0.00599299	0.104052	0.18171
MYO18B	12744147	6.85147	0.0696792	7.21061	0.0696792	6.91723	0.0696792	7.07843	0.0696792	5.39536	0.0139057	1.28266	1.04664	1.17037	-1.22551	-1.09595	1.11822	0.977691	0.642199	0.180958	0.00285392
LOC790152	12730465	6.8194	0.100512	6.71035	0.100512	7.25058	0.100512	6.91273	0.100512	5.39018	0.0139495	-1.07851	1.34834	1.06684	1.4542	1.15059	-1.26387	0.977691	0.00834875	0.277253	0.0461853
HAUS1	12808058	9.88087	0.0994975	9.91114	0.0994975	9.4713	0.0994975	9.52535	0.0994975	5.3898	0.0139527	1.0212	-1.32829	-1.27945	-1.35646	-1.30658	1.03818	0.977691	0.00177141	0.906866	0.679251
LOC100337349	12766945	5.86723	0.0894477	6.12035	0.0894477	6.12073	0.0894477	5.69633	0.0894477	5.38951	0.0139552	1.19178	1.1921	-1.12576	1.00027	-1.34166	-1.34202	0.977691	0.359324	0.00258916	0.357222
LOC613731	12712726	6.09673	0.0733776	5.98395	0.0733776	6.32759	0.0733776	5.95115	0.0733776	5.3873	0.0139739	-1.08131	1.17354	-1.10617	1.26895	-1.023	-1.29813	0.977691	0.202052	0.0975937	0.00595869
MAP2K4	12763888	9.83971	0.0877746	9.94982	0.0877746	9.51036	0.0877746	9.60371	0.0877746	5.38586	0.0139862	1.07931	-1.25645	-1.17772	-1.3561	-1.27113	1.06685	0.977691	0.00231965	0.925505	0.268987
LOC100335420	12914915	6.36024	0.0816154	6.41057	0.0816154	6.36228	0.0816154	6.7535	0.0816154	5.38172	0.0140215	1.0355	1.00141	1.31335	-1.03404	1.26833	1.3115	0.977691	0.056195	0.058736	0.0191303
CHN2	12853629	11.2423	0.2077	10.3501	0.2077	10.237	0.2077	10.264	0.2077	5.37917	0.0140433	-1.85594	-2.00736	-1.97019	-1.08159	-1.06156	1.01887	0.977691	0.0220759	0.0470594	0.0593309
PTPLAD2	12891980	10.4445	0.170002	11.1694	0.170002	11.3011	0.170002	11.2047	0.170002	5.37781	0.0140549	1.65281	1.8108	1.6937	1.09558	1.02473	-1.06914	0.977691	0.0222563	0.0325678	0.0893209
LOC100336408	12827480	10.2714	0.108694	10.353	0.108694	10.1177	0.108694	9.78348	0.108694	5.35948	0.0142127	1.05815	-1.11246	-1.40247	-1.17715	-1.48403	-1.2607	0.977691	0.00603043	0.079964	0.267708
	12914215	7.33461	0.115932	7.6333	0.115932	7.94209	0.115932	7.84176	0.115932	5.35908	0.0142162	1.23003	1.52359	1.42124	1.23866	1.15546	-1.07201	0.977691	0.00423076	0.110923	0.409006
LOC100297571	12824717	6.58586	0.0855371	6.43344	0.0855371	6.67358	0.0855371	6.90696	0.0855371	5.3576	0.0142291	-1.11143	1.06269	1.24928	1.18111	1.3885	1.17559	0.977691	0.00657144	0.0435895	0.644531
CASP1	12727830	10.0407	0.115793	10.5584	0.115793	9.95774	0.115793	10.1173	0.115793	5.35515	0.0142504	1.43167	-1.0592	1.05453	-1.51643	-1.35764	1.11696	0.977691	0.0429786	0.147967	0.0127321
SKAP1	12761964	10.9589	0.083393	10.7862	0.083393	10.8087	0.083393	10.4971	0.083393	5.35461	0.014255	-1.12715	-1.10967	-1.37726	1.01575	-1.2219	-1.24115	0.977691	0.0218295	0.420896	0.0132271
LOC100336936	12869693	8.07608	0.201383	8.96375	0.201383	8.89823	0.201383	9.10839	0.201383	5.34033	0.0143799	1.85019	1.76805	2.0453	-1.04646	1.10546	1.15681	0.977691	0.0334948	0.118357	0.018412
ASB7	12792043	10.6755	0.155714	11.2841	0.155714	10.4316	0.155714	10.7353	0.155714	5.33912	0.0143905	1.5247	-1.18423	1.04229	-1.8056	-1.46284	1.23431	0.977691	0.0256797	0.347002	0.0126235
LOC100295424	12717792	6.87705	0.0652505	7.07879	0.0652505	7.01628	0.0652505	7.24064	0.0652505	5.33814	0.0143991	1.15008	1.10132	1.28663	-1.04428	1.11873	1.16827	0.977691	0.0396808	0.865221	0.00676331
TRH	12800251	6.2281	0.0504977	6.29526	0.0504977	6.49962	0.0504977	6.30906	0.0504977	5.32849	0.0144844	1.04765	1.20708	1.05772	1.15218	1.00961	-1.14121	0.977691	0.0153156	0.0253826	0.245219
LCAT	12756849	8.49925	0.0957287	8.09628	0.0957287	8.5464	0.0957287	8.20186	0.0957287	5.3243	0.0145216	-1.32223	1.03322	-1.22892	1.36615	1.07592	-1.26974	0.977691	0.440561	0.765434	0.00209377
LOC615250	12772753	7.87857	0.0750587	7.92203	0.0750587	7.74802	0.0750587	8.16269	0.0750587	5.32221	0.0145402	1.03058	-1.09471	1.21767	-1.12819	1.18153	1.333	0.977691	0.477364	0.0293409	0.0100502
MRRF	12707867	9.44552	0.175744	9.55012	0.175744	8.83568	0.175744	8.7668	0.175744	5.32134	0.0145479	1.0752	-1.52608	-1.60072	-1.64084	-1.72109	-1.04891	0.977691	0.00188109	0.630513	0.920738
LOC789553	12848349	7.57913	0.0994948	7.24834	0.0994948	7.79788	0.0994948	7.46096	0.0994948	5.32004	0.0145595	-1.25771	1.16372	-1.08536	1.46362	1.15879	-1.26306	0.977691	0.0509972	0.975931	0.00572079
C19H17orf59	12772250	6.71232	0.0658207	6.40958	0.0658207	6.49574	0.0658207	6.7036	0.0658207	5.30344	0.0147083	-1.23349	-1.16198	-1.00607	1.06155	1.22605	1.15497	0.977691	0.567249	0.00219288	0.484814
	12912897	10.2671	0.160265	9.76975	0.160265	10.6716	0.160265	10.2606	0.160265	5.30206	0.0147208	-1.41162	1.32363	-1.00455	1.86846	1.40522	-1.32965	0.977691	0.0162485	0.792323	0.0150621
LOC100299770	12797797	12.4667	0.167282	12.5303	0.167282	13.2594	0.167282	12.4779	0.167282	5.29406	0.0147933	1.04509	1.73237	1.00783	1.65763	-1.03697	-1.71892	0.977691	0.04703	0.0266118	0.0530484
LOC790172	12911627	7.01802	0.100883	7.29284	0.100883	7.49761	0.100883	7.5165	0.100883	5.29219	0.0148102	1.20985	1.39435	1.41273	1.1525	1.16769	1.01318	0.977691	0.00450085	0.228689	0.171126
RFFL	12764142	9.09208	0.110115	9.41568	0.110115	8.80898	0.110115	9.00133	0.110115	5.29111	0.01482	1.25145	-1.2168	-1.06492	-1.52277	-1.3327	1.14263	0.977691	0.008116	0.562261	0.0371948
ATP2A1	12816997	7.7774	0.103381	7.3342	0.103381	7.77901	0.103381	7.85595	0.103381	5.29106	0.0148205	-1.35961	1.00111	1.05596	1.36113	1.43569	1.05478	0.977691	0.0263616	0.0271253	0.101867
UPP1	12854172	7.61451	0.096281	7.21248	0.096281	7.18422	0.096281	7.13317	0.096281	5.2873	0.0148548	-1.32137	-1.34751	-1.39604	-1.01978	-1.05651	-1.03602	0.977691	0.02132	0.093342	0.0365202
LOC100336373	12914759	8.80039	0.0630851	8.76848	0.0630851	9.02003	0.0630851	9.04733	0.0630851	5.27711	0.0149481	-1.02237	1.16444	1.18668	1.19049	1.21323	1.0191	0.977691	0.00192461	0.647263	0.971377
PPP1R14D	12697381	5.7862	0.0957824	5.87283	0.0957824	6.07825	0.0957824	6.27798	0.0957824	5.27642	0.0149544	1.06189	1.22438	1.40618	1.15302	1.32423	1.14848	0.977691	0.00339101	0.565875	0.16078
LYSB	12857721	8.01189	0.252694	9.0006	0.252694	7.63852	0.252694	8.05671	0.252694	5.27249	0.0149906	1.98442	-1.29537	1.03156	-2.57056	-1.92371	1.33625	0.977691	0.0229523	0.281011	0.016533
ITGB4	12768342	7.44922	0.0846318	7.807	0.0846318	7.52126	0.0846318	7.82819	0.0846318	5.27184	0.0149966	1.28145	1.0512	1.30042	-1.21903	1.0148	1.23707	0.977691	0.59186	0.768999	0.00200929
KLF3	12871490	11.1929	0.134597	11.3254	0.134597	11.892	0.134597	11.3507	0.134597	5.27071	0.015007	1.09615	1.62346	1.11558	1.48105	1.01773	-1.45526	0.977691	0.0196303	0.0277751	0.154736
RASSF9	12868450	7.32419	0.0637314	7.20913	0.0637314	6.99829	0.0637314	7.06431	0.0637314	5.26836	0.0150288	-1.08302	-1.25345	-1.19738	-1.15737	-1.1056	1.04682	0.977691	0.00307444	0.180878	0.707162
LOC100294775	12848446	11.0312	0.128343	10.597	0.128343	11.2232	0.128343	10.6809	0.128343	5.26793	0.0150327	-1.35109	1.14239	-1.2748	1.54347	1.05984	-1.45632	0.977691	0.303579	0.680824	0.00251123
STOML1	12791004	7.58273	0.115872	8.00366	0.115872	7.81407	0.115872	7.39473	0.115872	5.26725	0.015039	1.3388	1.17393	-1.13918	-1.14044	-1.52513	-1.33732	0.977691	0.129198	0.00347685	0.994622
MICAL2	12732807	8.51945	0.142051	8.13083	0.142051	7.89098	0.142051	7.78437	0.142051	5.26655	0.0150455	-1.30914	-1.54592	-1.66448	-1.18087	-1.27143	-1.0767	0.977691	0.00497102	0.340486	0.106851
GBP7	12838274	9.98212	0.234539	11.1766	0.234539	10.3244	0.234539	10.111	0.234539	5.2536	0.0151659	2.28862	1.26771	1.09342	-1.80531	-2.09308	-1.1594	0.977691	0.148979	0.0110396	0.0584142
COG4	12752785	8.45952	0.0579009	8.6206	0.0579009	8.29645	0.0579009	8.47316	0.0579009	5.23876	0.0153054	1.11812	-1.11967	1.0095	-1.25192	-1.1076	1.1303	0.977691	0.0199863	0.894855	0.0129145
MRPS6	12686832	9.76226	0.1483	9.4991	0.1483	10.1016	0.1483	9.32121	0.1483	5.23873	0.0153057	-1.20011	1.26518	-1.35759	1.51835	-1.13122	-1.71759	0.977691	0.596175	0.106723	0.00423614
LOC539947	12872163	5.34311	0.0786314	5.6095	0.0786314	5.77393	0.0786314	5.51739	0.0786314	5.23326	0.0153575	1.20279	1.348	1.1284	1.12073	-1.06593	-1.19461	0.977691	0.0522859	0.00605166	0.951089
	12913265	7.04413	0.257184	6.82545	0.257184	7.39034	0.257184	6.00694	0.257184	5.22385	0.0154471	-1.16367	1.27121	-2.05224	1.47926	-1.76359	-2.60882	0.977691	0.376577	0.0428721	0.0089433
LOC525035	12809961	7.09341	0.0398272	7.14356	0.0398272	7.21638	0.0398272	7.30255	0.0398272	5.22102	0.0154741	1.03537	1.08898	1.156	1.05177	1.1165	1.06154	0.977691	0.00407263	0.659254	0.112715
LOC100337232	12713488	16.1769	0.0615919	16.1279	0.0615919	16.3311	0.0615919	15.9903	0.0615919	5.21331	0.0155481	-1.03453	1.11277	-1.1381	1.15119	-1.10011	-1.26644	0.977691	0.895665	0.0354778	0.00816049
LOC100337248	12713490	16.1769	0.0615919	16.1279	0.0615919	16.3311	0.0615919	15.9903	0.0615919	5.21331	0.0155481	-1.03453	1.11277	-1.1381	1.15119	-1.10011	-1.26644	0.977691	0.895665	0.0354778	0.00816049
CHAF1A	12883701	7.61074	0.120574	6.98817	0.120574	7.10797	0.120574	7.12668	0.120574	5.20805	0.0155988	-1.53962	-1.41693	-1.39867	1.08659	1.10077	1.01305	0.977691	0.156791	0.0208183	0.0277049
LOC617702	12753972	11.2636	0.185551	11.8183	0.185551	12.2863	0.185551	11.6592	0.185551	5.19843	0.0156919	1.46886	2.03175	1.31556	1.38321	-1.11653	-1.5444	0.977691	0.0382514	0.00785638	0.848687
GHRHR	12853104	6.80284	0.0676767	6.60216	0.0676767	6.67474	0.0676767	6.95307	0.0676767	5.18765	0.0157972	-1.14924	-1.09285	1.10975	1.0516	1.27536	1.21279	0.977691	0.125647	0.00407891	0.576776
	12912925	8.54603	0.315954	10.1208	0.315954	9.785	0.315954	9.97013	0.315954	5.18629	0.0158105	2.97892	2.36028	2.68346	-1.2621	-1.11011	1.13692	0.977691	0.110686	0.0482109	0.016494
	12912255	6.33918	0.242626	5.01873	0.242626	5.43093	0.242626	5.53208	0.242626	5.18627	0.0158107	-2.49745	-1.87677	-1.74969	1.33072	1.42737	1.07263	0.977691	0.431612	0.0126126	0.027271
NGB	12693786	8.81253	0.149392	8.46813	0.149392	9.05472	0.149392	9.25929	0.149392	5.18537	0.0158196	-1.26962	1.18279	1.36298	1.5017	1.73046	1.15234	0.977691	0.00473007	0.0910395	0.648167
BRP44L	12901466	13.094	0.170212	12.9832	0.170212	12.2251	0.170212	12.8292	0.170212	5.17899	0.0158823	-1.07986	-1.82624	-1.20147	-1.69117	-1.11261	1.52	0.977691	0.0109733	0.0575347	0.173002
PEX11G	12884018	7.3496	0.0843363	7.67007	0.0843363	7.30615	0.0843363	7.23705	0.0843363	5.1785	0.0158872	1.24874	-1.03058	-1.08114	-1.28692	-1.35007	-1.04907	0.977691	0.0153202	0.0395001	0.161963
SDHC	12779679	9.95223	0.290115	9.18863	0.290115	8.75637	0.290115	8.42494	0.290115	5.17398	0.0159319	-1.69772	-2.29082	-2.88244	-1.34935	-1.69783	-1.25826	0.977691	0.0054965	0.470709	0.0835477
FXN	12889415	10.1764	0.106116	9.97216	0.106116	9.6	0.106116	9.98799	0.106116	5.17107	0.0159607	-1.15208	-1.49113	-1.13951	-1.29429	1.01103	1.30857	0.977691	0.0215196	0.0163296	0.40359
LOC784712	12807079	5.7329	0.0705916	5.47691	0.0705916	5.39856	0.0705916	5.38973	0.0705916	5.16571	0.016014	-1.19415	-1.2608	-1.26855	-1.05581	-1.0623	-1.00614	0.977691	0.0113659	0.105516	0.0852165
LOC784704	12910548	11.4345	0.262971	11.5741	0.262971	12.4073	0.262971	10.9741	0.262971	5.16533	0.0160177	1.1016	1.96261	-1.37602	1.7816	-1.51582	-2.70059	0.977691	0.492118	0.011262	0.0300533
BMX	12909088	6.76694	0.0701276	6.58874	0.0701276	6.6284	0.0701276	6.38228	0.0701276	5.1461	0.0162105	-1.13147	-1.10079	-1.30556	1.02788	-1.15386	-1.18602	0.977691	0.0300493	0.636894	0.0105561
LOC100295672	12863530	7.55835	0.199391	7.55898	0.199391	8.47453	0.199391	7.59448	0.199391	5.14522	0.0162194	1.00044	1.88712	1.02536	1.88629	1.02491	-1.84044	0.977691	0.0343544	0.0474137	0.0476845
MIR7-1	12788868	7.8993	0.0743843	7.88106	0.0743843	8.13858	0.0743843	8.21523	0.0743843	5.13988	0.0162735	-1.01272	1.18041	1.24482	1.19542	1.26065	1.05457	0.977691	0.00229058	0.535573	0.701471
LOC100337264	12713492	16.2096	0.0587533	16.1471	0.0587533	16.3495	0.0587533	16.0297	0.0587533	5.13786	0.016294	-1.04427	1.10179	-1.13282	1.15057	-1.0848	-1.24814	0.977691	0.851841	0.049056	0.00691499
	12913763	8.98916	0.128086	8.98788	0.128086	9.59977	0.128086	9.26335	0.128086	5.13776	0.0162951	-1.00089	1.5269	1.20931	1.52826	1.21039	-1.26262	0.977691	0.0047268	0.215293	0.212024
NKX1-2	12823227	6.66993	0.109002	6.76715	0.109002	6.95901	0.109002	7.23038	0.109002	5.13518	0.0163212	1.06972	1.22187	1.47473	1.14224	1.37862	1.20695	0.977691	0.00479682	0.439943	0.116669
LOC616198	12901415	5.22141	0.056838	5.51599	0.056838	5.30744	0.056838	5.42002	0.056838	5.13312	0.0163423	1.22652	1.06145	1.14759	-1.15552	-1.06878	1.08116	0.977691	0.931763	0.135349	0.00377068
SUSD4	12739111	7.16227	0.0755285	7.14611	0.0755285	7.28426	0.0755285	7.51671	0.0755285	5.13083	0.0163656	-1.01127	1.08823	1.27848	1.10049	1.29289	1.17483	0.977691	0.00681676	0.125721	0.177731
TMEM206	12737380	7.87565	0.107275	7.54467	0.107275	8.11835	0.107275	7.72418	0.107275	5.12761	0.0163985	-1.25786	1.18321	-1.1107	1.48832	1.1325	-1.31419	0.977691	0.072622	0.773356	0.00546969
LOC100337109	12726578	7.02953	0.0909071	7.24534	0.0909071	6.89072	0.0909071	6.76478	0.0909071	5.12743	0.0164004	1.16136	-1.10099	-1.20143	-1.27865	-1.39528	-1.09122	0.977691	0.00520601	0.0846462	0.630022
LOC100336925	12832608	6.87934	0.125128	7.45511	0.125128	6.83223	0.125128	7.05081	0.125128	5.12204	0.0164557	1.49048	-1.03319	1.12621	-1.53994	-1.32345	1.16358	0.977691	0.0964088	0.178986	0.00800777
LRRC4B	12758925	7.03652	0.101171	7.21934	0.101171	7.32353	0.101171	6.80255	0.101171	5.10092	0.0166743	1.1351	1.22011	-1.17607	1.07489	-1.33496	-1.43493	0.977691	0.533331	0.00456082	0.120531
LOC509125	12727367	6.07116	0.0941771	5.68859	0.0941771	6.12424	0.0941771	6.13541	0.0941771	5.10065	0.0166772	-1.30366	1.03748	1.04554	1.35252	1.36303	1.00777	0.977691	0.021021	0.0585327	0.0721266
LOC100138230	12788587	8.98865	0.0872291	9.29014	0.0872291	9.45645	0.0872291	9.17325	0.0872291	5.09625	0.0167231	1.23241	1.38299	1.1365	1.12219	-1.08439	-1.21689	0.977691	0.0672912	0.00576513	0.918258
SCNN1A	12857159	6.44452	0.0906319	6.50802	0.0906319	6.85636	0.0906319	6.79298	0.0906319	5.08914	0.0167977	1.045	1.33038	1.27321	1.27309	1.21838	-1.04491	0.977691	0.00233482	0.49729	0.999461
POLD3	12729324	9.94286	0.113892	9.97764	0.113892	9.50502	0.113892	9.52745	0.113892	5.08833	0.0168063	1.0244	-1.35458	-1.33368	-1.38763	-1.36622	1.01567	0.977691	0.00211548	0.957671	0.805924
LOC616668	12682504	5.75662	0.0909914	5.95858	0.0909914	5.60705	0.0909914	6.06616	0.0909914	5.0818	0.0168752	1.15026	-1.10924	1.2393	-1.27592	1.07741	1.37469	0.977691	0.821355	0.183056	0.00343459
LOC100335838	12738151	8.96364	0.113601	8.60299	0.113601	8.50857	0.113601	8.36248	0.113601	5.07955	0.016899	-1.284	-1.37085	-1.51693	-1.06763	-1.1814	-1.10656	0.977691	0.00987239	0.363604	0.0455844
MYO19	12768696	8.40474	0.0740475	8.44638	0.0740475	8.1339	0.0740475	8.5142	0.0740475	5.07546	0.0169425	1.02929	-1.20651	1.07883	-1.24184	1.04813	1.30161	0.977691	0.195503	0.0411722	0.0146454
LOC100335999	12713432	16.2158	0.0593553	16.11	0.0593553	16.3785	0.0593553	16.0841	0.0593553	5.07295	0.0169692	-1.07609	1.11938	-1.0956	1.20455	-1.01813	-1.2264	0.977691	0.271688	0.138057	0.00555544
LOC100337396	12713519	16.2158	0.0593553	16.11	0.0593553	16.3785	0.0593553	16.0841	0.0593553	5.07295	0.0169692	-1.07609	1.11938	-1.0956	1.20455	-1.01813	-1.2264	0.977691	0.271688	0.138057	0.00555544
LOC100337441	12713523	16.2158	0.0593553	16.11	0.0593553	16.3785	0.0593553	16.0841	0.0593553	5.07295	0.0169692	-1.07609	1.11938	-1.0956	1.20455	-1.01813	-1.2264	0.977691	0.271688	0.138057	0.00555544
LOC100337452	12713525	16.2158	0.0593553	16.11	0.0593553	16.3785	0.0593553	16.0841	0.0593553	5.07295	0.0169692	-1.07609	1.11938	-1.0956	1.20455	-1.01813	-1.2264	0.977691	0.271688	0.138057	0.00555544
LOC100337459	12713527	16.2158	0.0593553	16.11	0.0593553	16.3785	0.0593553	16.0841	0.0593553	5.07295	0.0169692	-1.07609	1.11938	-1.0956	1.20455	-1.01813	-1.2264	0.977691	0.271688	0.138057	0.00555544
	12840725	12.3576	0.22154	11.9318	0.22154	12.1215	0.22154	11.2019	0.22154	5.07149	0.0169847	-1.34332	-1.17782	-2.22789	1.14051	-1.6585	-1.89153	0.977691	0.0498769	0.286948	0.0103437
	12913557	11.5721	0.125034	12.2154	0.125034	12.058	0.125034	12.0799	0.125034	5.0706	0.0169942	1.56184	1.40043	1.42183	-1.11526	-1.09847	1.01528	0.977691	0.186507	0.0287036	0.0208003
MED17	12834795	10.7806	0.108216	10.5434	0.108216	10.2127	0.108216	10.37	0.108216	5.06467	0.0170576	-1.17876	-1.48247	-1.32926	-1.25765	-1.12767	1.11526	0.977691	0.00502893	0.093229	0.718434
LOC615336	12697178	6.71409	0.140317	7.04141	0.140317	6.40911	0.140317	6.35848	0.140317	5.05947	0.0171134	1.25468	-1.2354	-1.27953	-1.55003	-1.6054	-1.03572	0.977691	0.00422113	0.202929	0.343634
CRX	12749252	5.59254	0.0789452	5.9695	0.0789452	5.67669	0.0789452	5.89357	0.0789452	5.0587	0.0171217	1.2986	1.06006	1.23202	-1.22502	-1.05404	1.16221	0.977691	0.959324	0.330646	0.00271576
LOC783134	12754540	9.13531	0.116266	9.112	0.116266	9.64781	0.116266	9.12842	0.116266	5.05751	0.0171345	-1.01629	1.42652	-1.00479	1.44976	1.01145	-1.43335	0.977691	0.0420823	0.0542264	0.037802
MRPS9	12700496	9.7381	0.0887322	9.51728	0.0887322	9.2911	0.0887322	9.67646	0.0887322	5.05276	0.0171857	-1.1654	-1.36321	-1.04365	-1.16974	1.11666	1.30619	0.977691	0.130792	0.00511747	0.37211
MORF4L2	12909707	14.2354	0.126796	13.9942	0.126796	14.3957	0.126796	13.7439	0.126796	5.04886	0.0172279	-1.18198	1.11754	-1.40586	1.3209	-1.18941	-1.5711	0.977691	0.729039	0.131405	0.00421332
SLC7A4	12745653	7.96806	0.0518507	8.20125	0.0518507	8.15386	0.0518507	7.9904	0.0518507	5.04677	0.0172506	1.17543	1.13745	1.01561	-1.03339	-1.15737	-1.11997	0.977691	0.813219	0.00241786	0.514076
LOC532441	12886434	6.28712	0.0959993	6.15693	0.0959993	6.55185	0.0959993	6.61122	0.0959993	5.04518	0.0172678	-1.09444	1.20141	1.25189	1.31487	1.37012	1.04202	0.977691	0.0027966	0.342961	0.718679
LPIN1	12707198	9.39286	0.167036	9.31018	0.167036	10.1145	0.167036	9.40378	0.167036	5.04286	0.0172931	-1.05898	1.64903	1.0076	1.74629	1.06703	-1.63659	0.977691	0.0311434	0.0846169	0.0350913
MIR181A-1	12738135	5.70884	0.063942	6.01698	0.063942	5.96955	0.063942	5.80364	0.063942	5.03841	0.0173416	1.23811	1.19807	1.06792	-1.03342	-1.15937	-1.12188	0.977691	0.717487	0.00299776	0.287854
	12914433	5.78041	0.227735	6.67242	0.227735	6.95007	0.227735	6.24754	0.227735	5.03423	0.0173873	1.85575	2.24957	1.38236	1.21222	-1.34245	-1.62734	0.977691	0.127952	0.00437519	0.684742
C10H15orf43	12692221	6.89933	0.0850282	7.26953	0.0850282	7.09399	0.0850282	6.85509	0.0850282	5.03177	0.0174143	1.29253	1.14445	-1.03114	-1.12939	-1.33278	-1.18009	0.977691	0.220533	0.00377032	0.454995
LOC788627	12914647	7.24198	0.0844093	6.96521	0.0844093	7.36665	0.0844093	7.3666	0.0844093	5.02868	0.0174482	-1.21148	1.09026	1.09022	1.32083	1.32078	-1.00004	0.977691	0.0089185	0.127124	0.126974
DNAJC16	12739508	10.4349	0.0880527	10.4306	0.0880527	10.0262	0.0880527	10.3909	0.0880527	5.0212	0.0175307	-1.00298	-1.32753	-1.03102	-1.32358	-1.02795	1.28758	0.977691	0.0256128	0.0580425	0.0632818
WC1.3	12865951	9.25538	0.112314	9.21534	0.112314	9.58805	0.112314	9.72898	0.112314	5.0151	0.0175983	-1.02814	1.25934	1.38857	1.29478	1.42764	1.10261	0.977691	0.00268366	0.436142	0.661326
LOC100297111	12748920	6.86936	0.0920301	6.80958	0.0920301	7.03409	0.0920301	7.27008	0.0920301	5.0124	0.0176284	-1.04231	1.12095	1.32016	1.16838	1.37602	1.17771	0.977691	0.00530059	0.134046	0.357301
LOC100335447	12915291	7.16233	0.0420052	7.38085	0.0420052	7.25318	0.0420052	7.20886	0.0420052	5.00673	0.0176916	1.16353	1.06499	1.03277	-1.09253	-1.12661	-1.0312	0.977691	0.353162	0.00871452	0.0603205
MRPL27	12762549	9.60015	0.123915	9.59524	0.123915	9.17338	0.123915	9.83954	0.123915	4.99775	0.0177923	-1.00341	-1.34422	1.1805	-1.33965	1.18452	1.58684	0.977691	0.475719	0.0190337	0.0204799
LOC615941	12729975	8.13222	0.105784	7.93677	0.105784	8.34775	0.105784	8.47209	0.105784	4.9976	0.017794	-1.14508	1.16113	1.26564	1.32959	1.44926	1.09001	0.977691	0.00400426	0.156537	0.742584
TMEM88	12762058	7.71582	0.120142	7.5246	0.120142	8.15058	0.120142	7.9155	0.120142	4.99613	0.0178105	-1.14173	1.35168	1.14844	1.54326	1.31122	-1.17697	0.977691	0.00492896	0.858235	0.101388
XPO4	12709218	10.0949	0.0902629	10.193	0.0902629	9.83333	0.0902629	9.77468	0.0902629	4.99517	0.0178214	1.07036	-1.19878	-1.24852	-1.28313	-1.33637	-1.04149	0.977691	0.00269066	0.402263	0.830669
FBXO36	12779467	7.87241	0.0919692	7.54263	0.0919692	7.52531	0.0919692	7.38798	0.0919692	4.99483	0.0178252	-1.25682	-1.272	-1.39903	-1.01208	-1.11315	-1.09987	0.977691	0.0183405	0.316064	0.0259638
POLR3A	12828746	10.012	0.159121	10.5135	0.159121	9.76738	0.159121	9.75118	0.159121	4.99441	0.0178299	1.41566	-1.1848	-1.19818	-1.67728	-1.69622	-1.01129	0.977691	0.0081574	0.129761	0.15321
	12760485	5.57771	0.0849421	6.01864	0.0849421	5.71079	0.0849421	5.85654	0.0849421	4.99152	0.0178625	1.35748	1.09663	1.21321	-1.23787	-1.11891	1.10631	0.977691	0.86721	0.107869	0.00477432
MIR2342	12760484	5.57771	0.0849421	6.01864	0.0849421	5.71079	0.0849421	5.85654	0.0849421	4.99152	0.0178625	1.35748	1.09663	1.21321	-1.23787	-1.11891	1.10631	0.977691	0.86721	0.107869	0.00477432
LOC100335727	12914595	8.40954	0.104985	8.64643	0.104985	8.92066	0.104985	8.44692	0.104985	4.97656	0.0180325	1.17845	1.42516	1.02625	1.20936	-1.14831	-1.38871	0.977691	0.163568	0.00542324	0.281338
PSMB10	12755826	14.13	0.220612	14.8081	0.220612	13.6216	0.220612	14.0368	0.220612	4.96881	0.0181213	1.59998	-1.42252	-1.06672	-2.276	-1.70672	1.33355	0.977691	0.0133194	0.562535	0.0290681
CELA2A	12738614	7.11503	0.0682779	7.37605	0.0682779	7.18812	0.0682779	7.43682	0.0682779	4.96742	0.0181373	1.19832	1.05196	1.24988	-1.13913	1.04303	1.18814	0.977691	0.346309	0.929658	0.00285968
SH3GL3	12792788	7.62191	0.0917958	8.08034	0.0917958	7.71989	0.0917958	7.91662	0.0917958	4.96485	0.0181669	1.37404	1.07027	1.22663	-1.28383	-1.12017	1.1461	0.977691	0.726475	0.179521	0.00386278
ALS2CR13	12779218	11.067	0.232939	11.0396	0.232939	11.7902	0.232939	10.5281	0.232939	4.96441	0.018172	-1.01916	1.65087	-1.45291	1.68249	-1.42561	-2.39857	0.977691	0.657719	0.0211604	0.017025
ZSCAN21	12817395	7.73602	0.0914592	7.82525	0.0914592	7.37008	0.0914592	7.53957	0.0914592	4.96114	0.0182097	1.06381	-1.28872	-1.14587	-1.37095	-1.21898	1.12466	0.977691	0.003907	0.66863	0.182651
LOC785431	12803947	5.89582	0.0945498	6.02743	0.0945498	5.63123	0.0945498	5.58939	0.0945498	4.95753	0.0182515	1.09551	-1.20129	-1.23664	-1.31603	-1.35476	-1.02942	0.977691	0.00295029	0.377096	0.643507
LOC787051	12773490	6.07093	0.0786337	5.68363	0.0786337	5.96344	0.0786337	6.03201	0.0786337	4.95213	0.0183143	-1.30795	-1.07736	-1.02734	1.21403	1.27313	1.04868	0.977691	0.15152	0.0133571	0.0655108
ZDHHC24	12834306	8.6849	0.111397	8.71902	0.111397	8.301	0.111397	8.24912	0.111397	4.94703	0.0183736	1.02393	-1.30486	-1.35263	-1.33609	-1.38501	-1.03661	0.977691	0.00238603	0.706239	0.937786
PRP14	12804563	7.00751	0.0757114	7.00647	0.0757114	6.85982	0.0757114	6.65111	0.0757114	4.94558	0.0183906	-1.00072	-1.10779	-1.28023	-1.10699	-1.27931	-1.15566	0.977691	0.00608585	0.195302	0.191193
STK4	12715132	14.0934	0.125496	14.4853	0.125496	13.8117	0.125496	14.0505	0.125496	4.94514	0.0183957	1.31214	-1.21561	-1.03015	-1.59505	-1.3517	1.18003	0.977691	0.0145018	0.553251	0.0272558
LOC788711	12734011	6.13159	0.0721417	6.02698	0.0721417	6.31695	0.0721417	6.37159	0.0721417	4.94355	0.0184143	-1.07521	1.1371	1.181	1.22262	1.26981	1.0386	0.977691	0.00318822	0.291344	0.735077
LOC532585	12839803	6.27594	0.17804	5.92653	0.17804	6.82669	0.17804	6.62126	0.17804	4.94193	0.0184333	-1.27404	1.46485	1.27043	1.86628	1.61858	-1.15303	0.977691	0.00440003	0.693077	0.145154
LOC100336723	12856569	7.29005	0.137918	7.07722	0.137918	7.51582	0.137918	7.7919	0.137918	4.93948	0.0184621	-1.15896	1.1694	1.41603	1.35529	1.64112	1.2109	0.977691	0.00517856	0.101684	0.822509
MIR204	12892346	5.53152	0.0902803	5.76319	0.0902803	5.80089	0.0902803	6.02144	0.0902803	4.93854	0.0184732	1.17419	1.20529	1.40437	1.02648	1.19603	1.16518	0.977691	0.0127882	0.951896	0.0276849
UBTF	12767886	12.1844	0.0871565	12.0745	0.0871565	11.7575	0.0871565	12.1429	0.0871565	4.93499	0.0185148	-1.07913	-1.34437	-1.02915	-1.24578	1.04857	1.30629	0.977691	0.0621381	0.014849	0.139848
LOC100335752	12899225	7.35398	0.117995	7.83001	0.117995	7.40633	0.117995	7.225	0.117995	4.93433	0.0185226	1.39091	1.03695	-1.09352	-1.34134	-1.52099	-1.13393	0.977691	0.0372588	0.0164804	0.235561
PRP3	12804490	4.8286	0.123748	5.35897	0.123748	5.30538	0.123748	4.891	0.123748	4.9305	0.0185678	1.44429	1.39163	1.0442	-1.03784	-1.38315	-1.33272	0.977691	0.972182	0.00245216	0.647724
RYBP	12797019	9.82897	0.148191	9.94459	0.148191	10.4922	0.148191	9.7754	0.148191	4.92649	0.0186153	1.08344	1.58359	-1.03782	1.46163	-1.12442	-1.64348	0.977691	0.121419	0.0157945	0.0653295
	12831832	8.37745	0.300167	8.3333	0.300167	8.06477	0.300167	6.9551	0.300167	4.92575	0.0186241	-1.03108	-1.24201	-2.68023	-1.20458	-2.59945	-2.15797	0.977691	0.0155588	0.101264	0.0786707
LOC100140272	12748759	6.89042	0.117418	7.49617	0.117418	7.29586	0.117418	7.35912	0.117418	4.91952	0.0186982	1.52177	1.32449	1.38387	-1.14895	-1.09965	1.04483	0.977691	0.275364	0.0394742	0.0146534
LOC781337	12708452	9.44661	0.191744	9.73602	0.191744	8.75569	0.191744	9.09756	0.191744	4.9152	0.0187497	1.22214	-1.61432	-1.27373	-1.97292	-1.55667	1.2674	0.977691	0.00466037	0.89345	0.125652
MUSTN1	12796992	14.3187	0.255557	12.9516	0.255557	13.8416	0.255557	13.6942	0.255557	4.91513	0.0187506	-2.57956	-1.39192	-1.54168	1.85324	1.67322	-1.10759	0.977691	0.612825	0.0343626	0.0118492
LOC787025	12697808	11.1321	0.110239	10.8232	0.110239	11.4215	0.110239	11.1304	0.110239	4.91271	0.0187795	-1.23878	1.22217	-1.00118	1.51401	1.23733	-1.22362	0.977691	0.0190862	0.937073	0.0185492
ROM1	12829396	7.5747	0.0582151	7.72441	0.0582151	7.88661	0.0582151	7.76746	0.0582151	4.89837	0.0189522	1.10934	1.24134	1.14295	1.11899	1.03029	-1.08609	0.977691	0.0101105	0.0395386	0.797391
CCDC121	12703121	6.9589	0.106216	7.10904	0.106216	6.96634	0.106216	7.46068	0.106216	4.8955	0.018987	1.10968	1.00517	1.41596	-1.10397	1.27601	1.40867	0.977691	0.116751	0.131145	0.0103925
RPS6	12682700	8.61345	0.106681	8.18108	0.106681	8.38565	0.106681	8.08038	0.106681	4.89265	0.0190216	-1.34945	-1.17105	-1.44701	1.15234	-1.0723	-1.23565	0.977691	0.149584	0.562434	0.00474127
LOC515704	12802163	5.50526	0.145655	6.16278	0.145655	5.59857	0.145655	5.47762	0.145655	4.88719	0.0190881	1.57737	1.06681	-1.01934	-1.47858	-1.60787	-1.08745	0.977691	0.0649379	0.0203246	0.0903192
LOC100298832	12713392	16.197	0.0556733	16.066	0.0556733	16.2463	0.0556733	15.9764	0.0556733	4.8834	0.0191345	-1.09505	1.03478	-1.1652	1.13314	-1.06406	-1.20572	0.977691	0.724022	0.236027	0.00364278
LOC784435	12733888	6.24437	0.160855	7.094	0.160855	6.65411	0.160855	6.51164	0.160855	4.87656	0.0192184	1.80204	1.32845	1.20353	-1.3565	-1.49729	-1.10379	0.977691	0.60138	0.00947035	0.0482982
LOC531024	12826590	6.88331	0.0562826	6.79778	0.0562826	6.97253	0.0562826	7.08807	0.0562826	4.87616	0.0192232	-1.06108	1.06379	1.15249	1.12877	1.22289	1.08337	0.977691	0.00555512	0.0993287	0.794403
GYG1	12683252	11.0716	0.123053	10.6823	0.123053	10.6524	0.123053	11.1881	0.123053	4.86842	0.0193188	-1.30976	-1.33719	1.08412	-1.02094	1.41994	1.44967	0.977691	0.730955	0.00272766	0.562917
LOC100299289	12876471	10.4101	0.104639	10.3018	0.104639	10.6801	0.104639	10.7985	0.104639	4.86537	0.0193565	-1.07791	1.20583	1.30896	1.29977	1.41094	1.08553	0.977691	0.00324551	0.300121	0.96205
CNKSR3	12899815	8.70024	0.247756	8.79505	0.247756	9.79408	0.247756	8.63283	0.247756	4.8641	0.0193724	1.06792	2.13441	-1.04783	1.99866	-1.11901	-2.23651	0.977691	0.0845809	0.0261845	0.0524373
LOC527795	12894327	7.63225	0.0866446	8.00979	0.0866446	7.64807	0.0866446	7.91943	0.0866446	4.86095	0.0194115	1.29913	1.01103	1.22026	-1.28496	-1.06463	1.20695	0.977691	0.674722	0.551498	0.00279813
HSPA4	12880731	12.7931	0.262141	12.6264	0.262141	13.8013	0.262141	12.5686	0.262141	4.84852	0.0195669	-1.12251	2.01143	-1.16837	2.25785	-1.04086	-2.3501	0.977691	0.0949286	0.0647562	0.0204384
TRIM62	12776754	7.61726	0.085331	7.87043	0.085331	7.51577	0.085331	7.43924	0.085331	4.84842	0.0195682	1.19182	-1.07288	-1.13133	-1.27868	-1.34834	-1.05448	0.977691	0.00883488	0.0773332	0.321071
LOC100301469	12902150	7.02437	0.0335101	6.99436	0.0335101	7.15979	0.0335101	7.0919	0.0335101	4.84528	0.0196077	-1.02102	1.09841	1.04792	1.1215	1.06995	-1.04818	0.977691	0.00457994	0.582324	0.169776
LOC100337506	12703772	7.02437	0.0335101	6.99436	0.0335101	7.15979	0.0335101	7.0919	0.0335101	4.84528	0.0196077	-1.02102	1.09841	1.04792	1.1215	1.06995	-1.04818	0.977691	0.00457994	0.582324	0.169776
MIR654	12788862	7.50935	0.12688	7.01588	0.12688	7.67218	0.12688	7.42099	0.12688	4.84404	0.0196233	-1.40783	1.11948	-1.06316	1.57604	1.3242	-1.19018	0.977691	0.0449495	0.358512	0.012499
LOC100299636	12730554	5.38755	0.0423657	5.32141	0.0423657	5.52752	0.0423657	5.3398	0.0423657	4.84308	0.0196354	-1.04691	1.10189	-1.03365	1.15358	1.01283	-1.13897	0.977691	0.0862044	0.176849	0.0111469
MRPS14	12738739	8.42809	0.0788269	8.14741	0.0788269	8.05269	0.0788269	8.07279	0.0788269	4.84008	0.0196733	-1.21477	-1.2972	-1.27925	-1.06786	-1.05308	1.01403	0.977691	0.0145012	0.0806143	0.124259
F2RL1	12690050	7.33687	0.119121	7.71707	0.119121	7.11695	0.119121	7.22059	0.119121	4.8381	0.0196983	1.30153	-1.16467	-1.08393	-1.51585	-1.41077	1.07448	0.977691	0.0109232	0.268279	0.0650253
FAM49B	12722176	13.9025	0.0765835	13.8437	0.0765835	13.5813	0.0765835	13.5875	0.0765835	4.8374	0.0197072	-1.04156	-1.24939	-1.24401	-1.19953	-1.19437	1.00432	0.977691	0.00267066	0.678918	0.737586
MYOD1	12730848	6.54748	0.05499	6.54206	0.05499	6.51217	0.05499	6.77371	0.05499	4.83403	0.0197499	-1.00376	-1.02478	1.16977	-1.02094	1.17417	1.19876	0.977691	0.0995123	0.0318878	0.0381527
	12913407	8.53657	0.208166	8.82784	0.208166	7.9927	0.208166	7.85367	0.208166	4.83229	0.019772	1.22371	-1.45788	-1.60536	-1.78403	-1.96451	-1.10116	0.977691	0.00334963	0.321736	0.720972
LOC508455	12750471	6.79779	0.0792621	6.60723	0.0792621	6.57711	0.0792621	6.94917	0.0792621	4.83081	0.0197909	-1.14121	-1.16529	1.11063	-1.0211	1.26746	1.2942	0.977691	0.45912	0.00400283	0.274565
LOC783175	12913971	7.41518	0.0834058	7.78334	0.0834058	7.59805	0.0834058	7.38946	0.0834058	4.82307	0.0198897	1.2907	1.13514	-1.01799	-1.13704	-1.31392	-1.15556	0.977691	0.229904	0.00473916	0.357673
GEM	12723272	11.91	0.349341	11.3135	0.349341	12.8581	0.349341	11.1691	0.349341	4.82245	0.0198976	-1.51194	1.92933	-1.67116	2.91703	-1.10531	-3.22422	0.977691	0.272453	0.143857	0.00669153
GPR65	12692745	9.05992	0.206646	8.91408	0.206646	9.9306	0.206646	9.43605	0.206646	4.82239	0.0198984	-1.10637	1.82852	1.29785	2.02303	1.43591	-1.40888	0.977691	0.00557407	0.415319	0.147225
AHSA2	12701187	10.0113	0.285584	10.0502	0.285584	11.1864	0.285584	9.79565	0.285584	4.82163	0.0199081	1.02734	2.2581	-1.16124	2.198	-1.19299	-2.6222	0.977691	0.133009	0.0277566	0.0356063
CPN1	12822850	5.81133	0.0641168	5.85873	0.0641168	5.87676	0.0641168	6.12494	0.0641168	4.81766	0.019959	1.0334	1.0464	1.24281	1.01258	1.20264	1.1877	0.977691	0.0238207	0.143401	0.0398386
LOC100297004	12766723	12.0516	0.0816995	12.0548	0.0816995	12.2427	0.0816995	12.4273	0.0816995	4.81619	0.019978	1.00227	1.14169	1.29747	1.1391	1.29453	1.13644	0.977691	0.00481184	0.289058	0.272811
HCFC1R1	12817906	7.07085	0.116813	6.89794	0.116813	7.08126	0.116813	7.50104	0.116813	4.81617	0.0199782	-1.12733	1.00724	1.34741	1.13549	1.51898	1.33772	0.977691	0.0221374	0.026086	0.311465
ANKRD13B	12765478	7.44233	0.132667	7.93918	0.132667	7.70659	0.132667	7.2789	0.132667	4.81236	0.0200274	1.41113	1.20102	-1.11994	-1.17494	-1.58039	-1.34508	0.977691	0.161379	0.0045091	0.798772
FBXO25	12681995	9.45179	0.0963652	9.35989	0.0963652	8.99679	0.0963652	9.4253	0.0963652	4.80921	0.020068	-1.06577	-1.37079	-1.01853	-1.28619	1.04638	1.34584	0.977691	0.0661145	0.0193028	0.106242
LOC516723	12805793	8.26633	0.162215	7.78852	0.162215	7.72396	0.162215	7.40468	0.162215	4.80842	0.0200783	-1.39263	-1.45636	-1.81711	-1.04576	-1.3048	-1.24771	0.977691	0.0144917	0.633898	0.03021
	12915634	4.16285	0.0271415	4.26442	0.0271415	4.14799	0.0271415	4.13305	0.0271415	4.8035	0.0201421	1.07294	-1.01036	-1.02087	-1.08405	-1.09533	-1.0104	0.977691	0.0195271	0.0530053	0.136475
ODF3L2	12887870	7.48031	0.122789	6.99284	0.122789	7.57139	0.122789	7.52558	0.122789	4.80082	0.0201768	-1.40198	1.06517	1.03187	1.49334	1.44667	-1.03227	0.977691	0.0259288	0.0972949	0.0506555
TP53BP1	12792177	8.60323	0.107839	8.53853	0.107839	9.01678	0.107839	8.92858	0.107839	4.79895	0.0202013	-1.04587	1.33195	1.25297	1.39305	1.31044	-1.06304	0.977691	0.00289547	0.915072	0.491913
ACBD6	12741323	8.06757	0.125378	8.63118	0.125378	8.10118	0.125378	8.45403	0.125378	4.79708	0.0202257	1.47795	1.02357	1.30718	-1.44392	-1.13064	1.27708	0.977691	0.577612	0.417083	0.00329774
LOC782191	12835160	5.13827	0.111144	5.01051	0.111144	5.46469	0.111144	4.90359	0.111144	4.793	0.0202791	-1.09259	1.2539	-1.17664	1.37001	-1.07692	-1.47539	0.977691	0.342895	0.0749978	0.00920809
SETD7	12742746	10.0556	0.11592	9.46692	0.11592	9.68501	0.11592	9.58976	0.11592	4.7918	0.0202947	-1.50389	-1.2929	-1.38115	1.16319	1.08887	-1.06825	0.977691	0.306213	0.054711	0.0121419
NDUFAF4	12898874	8.77611	0.0903021	8.71551	0.0903021	8.39828	0.0903021	8.41477	0.0903021	4.78613	0.0203692	-1.0429	-1.29939	-1.28462	-1.24593	-1.23177	1.0115	0.977691	0.00273487	0.677031	0.811174
ATF3	12739608	8.34368	0.319095	8.19795	0.319095	9.57695	0.319095	8.06233	0.319095	4.77586	0.0205048	-1.10629	2.35099	-1.21533	2.60088	-1.09856	-2.85723	0.977691	0.111102	0.0531209	0.0231552
MIR199A-2	12882830	6.52749	0.159693	6.04489	0.159693	6.89123	0.159693	6.5659	0.159693	4.77169	0.0205602	-1.39726	1.28675	1.02698	1.79792	1.43496	-1.25295	0.977691	0.0169579	0.631302	0.0264379
C4H7orf25	12851480	9.26945	0.116885	9.38481	0.116885	8.80066	0.116885	9.22526	0.116885	4.76995	0.0205834	1.08325	-1.38395	-1.0311	-1.49916	-1.11694	1.3422	0.977691	0.0197476	0.210541	0.0394887
	12913405	10.0425	0.299152	10.9185	0.299152	10.2434	0.299152	11.4718	0.299152	4.76909	0.0205949	1.83526	1.14942	2.69318	-1.59669	1.46746	2.34308	0.977691	0.231408	0.566763	0.00424476
KCNRG	12709102	6.94165	0.108969	7.48839	0.108969	7.36681	0.108969	7.18438	0.108969	4.76593	0.0206371	1.46079	1.34272	1.18323	-1.08793	-1.23458	-1.13479	0.977691	0.588543	0.00582517	0.120444
SEC14L4	12746830	8.19735	0.119779	8.50153	0.119779	8.14832	0.119779	8.70176	0.119779	4.76581	0.0206387	1.23472	-1.03456	1.41855	-1.27739	1.14889	1.46758	0.977691	0.539738	0.318624	0.0037823
EPHB4	12812729	7.45311	0.0855443	7.38996	0.0855443	7.49653	0.0855443	7.80939	0.0855443	4.75975	0.0207198	-1.04474	1.03056	1.28012	1.07667	1.3374	1.24216	0.977691	0.019118	0.048334	0.170103
LOC100335527	12788872	8.89957	0.173358	8.86843	0.173358	9.6705	0.173358	9.29315	0.173358	4.75908	0.0207288	-1.02182	1.70636	1.31365	1.7436	1.34232	-1.29895	0.977691	0.00481829	0.337747	0.261565
LOC100295927	12902384	5.60188	0.0963873	5.6673	0.0963873	5.67746	0.0963873	6.06371	0.0963873	4.75141	0.0208321	1.04639	1.05378	1.37729	1.00707	1.31623	1.307	0.977691	0.0306834	0.121923	0.037182
LOC530773	12860710	6.79542	0.158101	6.02632	0.158101	6.17987	0.158101	6.51545	0.158101	4.74828	0.0208745	-1.70421	-1.53215	-1.21418	1.1123	1.40359	1.26189	0.977691	0.696289	0.00443383	0.195465
LOC100336409	12713445	16.1675	0.0555271	16.1021	0.0555271	16.3408	0.0555271	16.0694	0.0555271	4.74789	0.0208798	-1.04636	1.12769	-1.07031	1.17997	-1.02289	-1.20698	0.977691	0.229133	0.0882916	0.0104175
KCNJ9	12847414	5.2341	0.085739	5.101	0.085739	4.79113	0.085739	4.99944	0.085739	4.74687	0.0208936	-1.09665	-1.3594	-1.17663	-1.2396	-1.07293	1.15534	0.977691	0.00798706	0.0697453	0.668704
TNFRSF8	12741042	7.57908	0.132748	7.60679	0.132748	7.95974	0.132748	8.17829	0.132748	4.74625	0.020902	1.01939	1.30193	1.51489	1.27717	1.48607	1.16357	0.977691	0.00373865	0.486012	0.371915
C13H20orf30	12719451	11.2507	0.101676	11.5852	0.101676	11.0482	0.101676	11.3028	0.101676	4.74324	0.0209428	1.2609	-1.15069	1.03674	-1.4509	-1.21622	1.19296	0.977691	0.0344775	0.701274	0.0134146
GPR22	12852400	6.59026	0.101781	6.14933	0.101781	6.51372	0.101781	6.63804	0.101781	4.74317	0.0209437	-1.35748	-1.05449	1.03368	1.28733	1.40319	1.09	0.977691	0.0657274	0.0167485	0.145845
TRA2A	12855087	14.3046	0.141537	14.1074	0.141537	14.83	0.141537	14.3252	0.141537	4.74098	0.0209736	-1.14645	1.43933	1.0144	1.65012	1.16296	-1.4189	0.977691	0.0221605	0.298541	0.0289719
LOC783010	12899040	6.86951	0.0771138	6.54699	0.0771138	6.92742	0.0771138	6.80513	0.0771138	4.73442	0.0210631	-1.25052	1.04096	-1.04564	1.30173	1.19594	-1.08846	0.977691	0.0629537	0.218584	0.0137249
INHBB	12777446	6.53555	0.128644	6.28746	0.128644	6.31947	0.128644	6.89532	0.128644	4.73224	0.021093	-1.18764	-1.16158	1.28321	1.02243	1.52399	1.49056	0.977691	0.153752	0.00759849	0.226822
PAFAH2	12774590	8.98632	0.154675	8.70697	0.154675	9.51804	0.154675	9.08048	0.154675	4.73171	0.0211002	-1.21365	1.44565	1.06745	1.75451	1.29551	-1.35431	0.977691	0.0126919	0.618337	0.0389468
	12840728	13.3183	0.198568	12.3498	0.198568	13.029	0.198568	12.604	0.198568	4.73089	0.0211114	-1.95681	-1.22209	-1.64072	1.6012	1.19265	-1.34255	0.977691	0.930883	0.196197	0.00431135
LOC781470	12793912	8.06593	0.184301	8.84567	0.184301	7.93963	0.184301	8.3067	0.184301	4.73027	0.02112	1.71682	-1.0915	1.18163	-1.8739	-1.45293	1.28974	0.977691	0.096233	0.284824	0.00899969
MIPEP	12709719	9.3615	0.0881302	9.47535	0.0881302	9.04061	0.0881302	9.39918	0.0881302	4.72876	0.0211406	1.08211	-1.2491	1.02646	-1.35167	-1.05422	1.28216	0.977691	0.0437832	0.190245	0.0200265
PLIN2	12889041	12.7563	0.208147	12.3612	0.208147	12.0294	0.208147	11.6994	0.208147	4.72818	0.0211487	-1.31506	-1.65502	-2.08038	-1.25852	-1.58197	-1.25701	0.977691	0.00593663	0.878287	0.10708
EXOC3L	12758063	7.3981	0.0981999	7.63138	0.0981999	7.54812	0.0981999	7.90671	0.0981999	4.72638	0.0211734	1.17551	1.10959	1.42268	-1.05941	1.21027	1.28217	0.977691	0.0511816	0.535469	0.0107911
TMEM220	12768112	7.20385	0.0782646	7.55323	0.0782646	7.18306	0.0782646	7.29242	0.0782646	4.72553	0.0211851	1.27401	-1.01452	1.06332	-1.29251	-1.19815	1.07875	0.977691	0.0971937	0.151128	0.0125876
TOMM6	12801330	11.8341	0.138095	11.7232	0.138095	11.8317	0.138095	12.3874	0.138095	4.72148	0.0212409	-1.07994	-1.00168	1.46749	1.07813	1.5848	1.46996	0.977691	0.0337359	0.0326724	0.133245
LOC517722	12879320	6.06766	0.110523	5.97148	0.110523	6.5186	0.110523	6.24151	0.110523	4.71998	0.0212617	-1.06894	1.36694	1.12807	1.46117	1.20583	-1.21175	0.977691	0.00680746	0.429054	0.117079
LOC506891	12731407	5.168	0.104323	5.46476	0.104323	4.96082	0.104323	5.01287	0.104323	4.71615	0.0213148	1.22838	-1.15444	-1.11352	-1.41809	-1.36783	1.03674	0.977691	0.00823902	0.263633	0.120415
LOC782766	12730206	8.04978	0.10403	7.83239	0.10403	8.04697	0.10403	8.37971	0.10403	4.71606	0.021316	-1.16263	-1.00195	1.25696	1.16037	1.46138	1.25941	0.977691	0.0225044	0.0214091	0.589476
MGC134232	12905924	7.40886	0.0796407	7.74112	0.0796407	7.48137	0.0796407	7.73882	0.0796407	4.70729	0.0214381	1.25899	1.05155	1.25698	-1.19727	-1.0016	1.19536	0.977691	0.6672	0.646965	0.00302312
CRNKL1	12720062	11.0558	0.0635156	11.1062	0.0635156	10.8002	0.0635156	10.9234	0.0635156	4.70283	0.0215005	1.03553	-1.19385	-1.09617	-1.23628	-1.13512	1.08911	0.977691	0.00478982	0.577296	0.196992
GALK1	12764195	7.90048	0.0519011	7.89192	0.0519011	7.86539	0.0519011	7.66282	0.0519011	4.70242	0.0215062	-1.00596	-1.02462	-1.17908	-1.01856	-1.1721	-1.15074	0.977691	0.0256983	0.0862295	0.0646725
AMOTL2	12681779	8.86728	0.0943599	9.28535	0.0943599	9.27304	0.0943599	9.26988	0.0943599	4.69741	0.0215766	1.33613	1.32478	1.32188	-1.00857	-1.01078	-1.00219	0.977691	0.0608975	0.045447	0.0482634
IRGQ	12759329	7.38828	0.0852745	7.42205	0.0852745	7.47015	0.0852745	7.7903	0.0852745	4.69711	0.0215808	1.02369	1.05839	1.32136	1.0339	1.29078	1.24845	0.977691	0.0216034	0.118961	0.0601357
ANKRD9	12793053	7.55417	0.0989095	7.35319	0.0989095	7.76141	0.0989095	7.82575	0.0989095	4.69512	0.0216089	-1.14948	1.15448	1.20712	1.32705	1.38757	1.0456	0.977691	0.00492655	0.204677	0.502853
MAT2A	12706444	14.3059	0.191021	13.7301	0.191021	14.6342	0.191021	13.8683	0.191021	4.69085	0.0216691	-1.49048	1.2556	-1.35428	1.87144	1.10057	-1.70043	0.977691	0.24539	0.627722	0.00428728
LOC100300014	12682999	8.55521	0.134878	8.37864	0.134878	8.75017	0.134878	9.06054	0.134878	4.69023	0.0216779	-1.1302	1.14469	1.41945	1.29372	1.60426	1.24003	0.977691	0.00694936	0.0961843	0.628833
LOC526064	12874568	6.72853	0.107535	7.16999	0.107535	6.75286	0.107535	6.65469	0.107535	4.68486	0.0217539	1.35797	1.017	-1.05252	-1.33527	-1.42929	-1.07041	0.977691	0.0414626	0.0274555	0.136436
SERPINC1	12740739	7.74442	0.155702	7.74668	0.155702	8.31294	0.155702	7.52478	0.155702	4.68363	0.0217714	1.00157	1.483	-1.16445	1.48068	-1.16627	-1.72687	0.977691	0.287478	0.0260214	0.0267255
ASXL2	12697998	14.0222	0.0943821	13.9511	0.0943821	14.3399	0.0943821	13.8752	0.0943821	4.68139	0.0218033	-1.05048	1.24636	-1.10723	1.30928	-1.05402	-1.38001	0.977691	0.224364	0.0590684	0.0149503
QTRTD1	12679497	8.74814	0.10385	8.52167	0.10385	8.2017	0.10385	8.45982	0.10385	4.68136	0.0218038	-1.16997	-1.46048	-1.22122	-1.2483	-1.04381	1.19592	0.977691	0.012634	0.0378552	0.881435
CCDC117	12744488	11.7842	0.237678	11.6725	0.237678	12.696	0.237678	11.5864	0.237678	4.6752	0.0218916	-1.08052	1.88139	-1.14697	2.03288	-1.0615	-2.1579	0.977691	0.107959	0.0576199	0.0245756
PGM3	12899728	10.4344	0.202269	10.4168	0.202269	11.2597	0.202269	10.3217	0.202269	4.67192	0.0219387	-1.01227	1.77193	-1.08127	1.79368	-1.06816	-1.91593	0.977691	0.0962043	0.0420329	0.0358993
NT5M	12772938	6.92668	0.0747702	6.82629	0.0747702	6.95822	0.0747702	7.20672	0.0747702	4.67121	0.0219488	-1.07207	1.0221	1.21422	1.09576	1.30173	1.18797	0.977691	0.0174451	0.0378534	0.341528
RBM9	12866032	10.3457	0.0886504	9.88356	0.0886504	10.0651	0.0886504	10.1452	0.0886504	4.66966	0.0219711	-1.37761	-1.21472	-1.14914	1.1341	1.19882	1.05707	0.977691	0.916409	0.00993077	0.0521665
KRT222	12769255	5.57696	0.115924	6.12591	0.115924	5.73178	0.115924	5.6186	0.115924	4.6667	0.0220137	1.46302	1.11328	1.02928	-1.31415	-1.4214	-1.08161	0.977691	0.154326	0.0144642	0.0846667
LOC784593	12888215	5.5436	0.112592	5.35931	0.112592	5.50204	0.112592	5.92833	0.112592	4.66456	0.0220446	-1.13626	-1.02922	1.30562	1.104	1.48352	1.34377	0.977691	0.0372242	0.0189043	0.303659
ARID5B	12827244	14.5419	0.206636	14.3555	0.206636	15.2594	0.206636	14.2838	0.206636	4.66422	0.0220495	-1.13784	1.64436	-1.19584	1.87102	-1.05097	-1.96639	0.977691	0.14411	0.0803555	0.0157104
UBA2	12750252	12.5876	0.0685179	12.4241	0.0685179	12.2779	0.0685179	12.2765	0.0685179	4.66143	0.0220897	-1.12002	-1.23943	-1.2407	-1.10661	-1.10774	-1.00102	0.977691	0.00591997	0.259894	0.251778
LOC790024	12713148	6.70775	0.110351	7.13611	0.110351	6.74287	0.110351	7.13809	0.110351	4.65878	0.0221282	1.34571	1.02464	1.34756	-1.31335	1.00137	1.31515	0.977691	0.869313	0.883144	0.00286506
CUGBP2	12721164	9.55245	0.131489	9.3185	0.131489	8.91619	0.131489	9.04939	0.131489	4.64948	0.0222634	-1.17605	-1.55429	-1.41721	-1.32162	-1.20506	1.09673	0.977691	0.00486981	0.187963	0.708337
VPS25	12764527	11.8798	0.179899	12.0945	0.179899	11.1914	0.179899	11.6425	0.179899	4.63378	0.0224937	1.16048	-1.61144	-1.17883	-1.87005	-1.36801	1.36699	0.977691	0.00807512	0.523775	0.0890377
LOC784925	12697657	5.85239	0.0975185	6.24013	0.0975185	5.80547	0.0975185	5.81004	0.0975185	4.62906	0.0225635	1.30834	-1.03306	-1.02979	-1.35159	-1.34731	1.00318	0.977691	0.0308338	0.0730465	0.0672838
GLP1R	12802216	7.76828	0.0849432	7.63883	0.0849432	8.07408	0.0849432	7.81274	0.0849432	4.62249	0.0226611	-1.09387	1.23611	1.0313	1.35215	1.12811	-1.19859	0.977691	0.0153539	0.452561	0.0401757
PHACTR2	12897460	12.1098	0.0977104	12.4372	0.0977104	12.5124	0.0977104	12.1204	0.0977104	4.61847	0.0227211	1.25479	1.32189	1.00737	1.05347	-1.24561	-1.31221	0.977691	0.668605	0.00313995	0.746859
ZNF444	12748508	6.99151	0.0880083	7.11526	0.0880083	6.66939	0.0880083	6.88581	0.0880083	4.61077	0.0228365	1.08956	-1.25017	-1.07602	-1.36214	-1.17239	1.16185	0.977691	0.00863217	0.608127	0.0772315
LOC100295674	12692913	6.86826	0.131641	6.42495	0.131641	6.71763	0.131641	7.09903	0.131641	4.60683	0.0228958	-1.35973	-1.11005	1.17346	1.22492	1.59559	1.30261	0.977691	0.0700899	0.0086524	0.818052
LYSMD3	12887654	10.9427	0.222345	11.0414	0.222345	11.8028	0.222345	10.6968	0.222345	4.60454	0.0229303	1.07077	1.81516	-1.18581	1.69519	-1.26973	-2.15244	0.977691	0.268843	0.0189939	0.0428054
LOC789894	12754885	11.7253	0.15758	12.2006	0.15758	12.2028	0.15758	11.538	0.15758	4.59756	0.0230359	1.39018	1.3923	-1.13865	1.00153	-1.58293	-1.58535	0.977691	0.567822	0.00353099	0.558788
N6AMT1	12686803	7.78619	0.114598	7.74693	0.114598	7.46772	0.114598	7.26566	0.114598	4.59619	0.0230567	-1.02759	-1.24701	-1.43448	-1.21353	-1.39597	-1.15034	0.977691	0.00446886	0.491092	0.313121
LOC523768	12805906	6.3286	0.091068	6.08398	0.091068	6.32658	0.091068	6.562	0.091068	4.59301	0.0231051	-1.18478	-1.0014	1.1756	1.18312	1.39283	1.17725	0.977691	0.0226578	0.0217492	0.960524
IGSF21	12780905	7.34086	0.0770756	7.32291	0.0770756	7.62108	0.0770756	7.61418	0.0770756	4.5917	0.0231251	-1.01252	1.21438	1.20858	1.22958	1.22371	-1.0048	0.977691	0.00299563	0.944073	0.874576
C17H18orf55	12810622	9.45394	0.0858576	9.59118	0.0858576	9.29501	0.0858576	9.16959	0.0858576	4.5912	0.0231328	1.0998	-1.11646	-1.21786	-1.22788	-1.3394	-1.09082	0.977691	0.00546108	0.152037	0.946198
NFIB	12891421	11.4408	0.187799	11.9326	0.187799	11.841	0.187799	12.4202	0.187799	4.59037	0.0231454	1.40613	1.31971	1.97161	-1.06548	1.40216	1.49397	0.977691	0.0357965	0.819869	0.0145923
CEBPA	12755716	6.13115	0.0886882	6.57204	0.0886882	6.22792	0.0886882	6.27565	0.0886882	4.58927	0.0231622	1.35744	1.06938	1.10534	-1.26937	-1.22807	1.03363	0.977691	0.282418	0.0467278	0.0174508
TACC3	12870553	9.69822	0.108389	9.28288	0.108389	9.71376	0.108389	9.80169	0.108389	4.58231	0.0232688	-1.33361	1.01083	1.07436	1.34805	1.43277	1.06285	0.977691	0.0297667	0.0386554	0.156836
ZNF410	12690670	11.8437	0.0637274	11.8345	0.0637274	11.9705	0.0637274	11.64	0.0637274	4.5796	0.0233104	-1.0064	1.09185	-1.15165	1.09884	-1.14433	-1.25743	0.977691	0.604863	0.0268748	0.0205979
PRM3	12818266	8.45896	0.107883	8.26708	0.107883	8.4715	0.107883	8.82131	0.107883	4.57949	0.0233121	-1.14225	1.00873	1.28552	1.15222	1.46838	1.27439	0.977691	0.0221066	0.0273817	0.478237
RFXAP	12712702	10.7624	0.0914437	11.0751	0.0914437	10.6294	0.0914437	10.706	0.0914437	4.5788	0.0233227	1.24203	-1.09659	-1.03989	-1.362	-1.29157	1.05453	0.977691	0.0177437	0.221034	0.0546879
SH2D7	12788594	5.96441	0.0969614	6.27516	0.0969614	5.86473	0.0969614	5.81124	0.0969614	4.5781	0.0233335	1.24035	-1.07154	-1.11202	-1.32908	-1.37928	-1.03778	0.977691	0.0131707	0.0848516	0.209351
MIR2467	12892470	6.53491	0.196552	6.62567	0.196552	7.01879	0.196552	7.4551	0.196552	4.57734	0.0233452	1.06493	1.3985	1.89237	1.31323	1.77699	1.35315	0.977691	0.00587848	0.396633	0.20481
STAT4	12781647	11.8779	0.236076	11.694	0.236076	12.5678	0.236076	11.3726	0.236076	4.57639	0.0233599	-1.13595	1.61323	-1.41939	1.83255	-1.24952	-2.28981	0.977691	0.450147	0.0534053	0.0128181
LOC530282	12764149	7.47292	0.0642752	7.28998	0.0642752	7.59408	0.0642752	7.33786	0.0642752	4.57503	0.0233808	-1.1352	1.08761	-1.09814	1.23465	1.03375	-1.19435	0.977691	0.213076	0.579174	0.00511373
CRYZL1	12679202	10.3625	0.129537	10.7505	0.129537	10.0805	0.129537	10.4704	0.129537	4.57481	0.0233843	1.30859	-1.21589	1.07769	-1.5911	-1.21426	1.31035	0.977691	0.0508328	0.994171	0.0110077
LOC100299473	12734216	9.02342	0.0874471	9.32731	0.0874471	8.87871	0.0874471	9.06625	0.0874471	4.57359	0.0234031	1.23447	-1.10551	1.03014	-1.36472	-1.19836	1.13882	0.977691	0.038763	0.518467	0.0157524
SLC1A1	12892785	6.31154	0.087799	6.25567	0.087799	6.56938	0.087799	6.63639	0.087799	4.57253	0.0234195	-1.03949	1.19569	1.25253	1.2429	1.30199	1.04754	0.977691	0.00341002	0.497432	0.950494
LOC790435	12914353	9.69063	0.0619379	9.70459	0.0619379	9.96458	0.0619379	9.86763	0.0619379	4.56516	0.0235339	1.00973	1.20912	1.13054	1.19747	1.11965	-1.06951	0.977691	0.00416363	0.388185	0.515615
LOC615284	12868413	7.0374	0.126423	6.77524	0.126423	7.03857	0.126423	7.43046	0.126423	4.56447	0.0235445	-1.19927	1.00081	1.31317	1.20024	1.57485	1.31211	0.977691	0.0233991	0.0238015	0.617196
CD46	12739724	6.32392	0.0615838	6.58261	0.0615838	6.48478	0.0615838	6.61766	0.0615838	4.56023	0.0236108	1.19639	1.11796	1.22582	-1.07016	1.02459	1.09648	0.977691	0.137681	0.327182	0.00793321
IGDCC4	12696911	6.379	0.125238	6.1672	0.125238	6.61432	0.125238	6.77757	0.125238	4.55974	0.0236184	-1.15813	1.17717	1.3182	1.36332	1.52665	1.11981	0.977691	0.00550547	0.160134	0.849543
CRTC1	12884731	7.60023	0.105353	7.9818	0.105353	7.70349	0.105353	7.44801	0.105353	4.55795	0.0236464	1.30276	1.0742	-1.11128	-1.21277	-1.44772	-1.19373	0.977691	0.063623	0.0105962	0.560689
CAV1	12852904	11.7688	0.185535	11.0232	0.185535	11.93	0.185535	11.6322	0.185535	4.55722	0.0236578	-1.67667	1.11824	-1.09929	1.87491	1.52523	-1.22927	0.977691	0.0600732	0.250769	0.015695
SLC25A35	12771254	7.56207	0.103374	7.07258	0.103374	7.41976	0.103374	7.51162	0.103374	4.55519	0.0236896	-1.40395	-1.10367	-1.03559	1.27208	1.3557	1.06574	0.977691	0.176763	0.0156951	0.0784911
C25H7orf28A	12812223	11.1971	0.0901185	11.1958	0.0901185	10.802	0.0901185	10.9664	0.0901185	4.5549	0.0236942	-1.00092	-1.31499	-1.17336	-1.31378	-1.17229	1.1207	0.977691	0.00468085	0.375956	0.383387
TAGLN3	12680501	6.69236	0.0487803	6.88649	0.0487803	6.86638	0.0487803	6.92885	0.0487803	4.55291	0.0237254	1.14404	1.1282	1.17813	-1.01404	1.0298	1.04425	0.977691	0.0466073	0.202056	0.0219681
HNRNPH1	12881456	17.2122	0.160305	16.8279	0.160305	17.658	0.160305	17.3192	0.160305	4.55114	0.0237532	-1.30525	1.36214	1.07702	1.77793	1.40578	-1.26473	0.977691	0.0127612	0.889501	0.0435601
MIR2381	12807319	9.70111	0.11879	9.35064	0.11879	9.96905	0.11879	9.69352	0.11879	4.55079	0.0237587	-1.27498	1.20408	-1.00527	1.53518	1.26829	-1.21043	0.977691	0.0244999	0.757806	0.0217776
LOC534800	12796434	7.19261	0.0945441	7.39885	0.0945441	7.65984	0.0945441	7.28897	0.0945441	4.54815	0.0238003	1.15367	1.38245	1.06907	1.1983	-1.07914	-1.29313	0.977691	0.0831776	0.0100466	0.400999
LOC100335340	12892487	7.5302	0.111815	7.81851	0.111815	7.68713	0.111815	8.09301	0.111815	4.54472	0.0238544	1.2212	1.11491	1.47714	-1.09534	1.20958	1.32489	0.977691	0.0776855	0.608643	0.00911918
LOC100336626	12863717	8.32194	0.104864	8.11137	0.104864	8.3642	0.104864	7.87752	0.104864	4.54012	0.0239273	-1.15715	1.02972	-1.36077	1.19154	-1.17597	-1.40121	0.977691	0.378948	0.212608	0.00605877
LOC510507	12724804	7.43045	0.0769327	7.49489	0.0769327	7.71169	0.0769327	7.76828	0.0769327	4.53827	0.0239566	1.04568	1.21524	1.26385	1.16215	1.20864	1.04	0.977691	0.00361497	0.96015	0.446774
LOC515337	12879169	7.0719	0.108541	6.86557	0.108541	7.28692	0.108541	7.38332	0.108541	4.53176	0.0240602	-1.15374	1.16072	1.24093	1.33918	1.43172	1.0691	0.977691	0.00551351	0.188442	0.621785
MCCC1	12680135	9.22738	0.145362	9.48318	0.145362	8.74825	0.145362	9.04473	0.145362	4.53003	0.0240878	1.194	-1.3939	-1.13497	-1.66432	-1.35515	1.22814	0.977691	0.00827884	0.891052	0.0817677
MGC160046	12808054	8.91193	0.11505	9.28589	0.11505	9.39007	0.11505	8.92911	0.11505	4.52915	0.024102	1.29591	1.39295	1.01198	1.07488	-1.28057	-1.37646	0.977691	0.607527	0.00345994	0.711961
LOC100335264	12693208	7.63572	0.175469	7.34213	0.175469	8.21489	0.175469	7.90932	0.175469	4.52878	0.0241079	-1.22568	1.49399	1.20882	1.83116	1.48163	-1.2359	0.977691	0.00674617	0.973329	0.113488
CHST13	12799404	8.11224	0.0686135	8.13709	0.0686135	8.28853	0.0686135	8.42612	0.0686135	4.52477	0.0241721	1.01738	1.12998	1.24305	1.11068	1.22182	1.10006	0.977691	0.00535911	0.42738	0.259431
	12913505	11.1582	0.156688	11.4342	0.156688	10.6811	0.156688	11.3305	0.156688	4.52446	0.0241771	1.21077	-1.39197	1.12681	-1.68535	-1.07451	1.56849	0.977691	0.0885677	0.256416	0.012084
MIR323	12788776	4.92141	0.202861	4.70711	0.202861	5.67804	0.202861	4.87803	0.202861	4.52026	0.0242446	-1.16014	1.68954	-1.03052	1.96011	1.12578	-1.74111	0.977691	0.0412142	0.174441	0.0279148
LOC788027	12869398	4.49887	0.0849865	4.90321	0.0849865	4.60051	0.0849865	4.77937	0.0849865	4.51647	0.0243058	1.32348	1.07299	1.21462	-1.23345	-1.08963	1.13199	0.977691	0.898237	0.209369	0.00497511
Vl1a	12745649	8.34073	0.57948	6.97032	0.57948	5.78958	0.57948	8.34317	0.57948	4.51317	0.0243591	-2.58544	-5.86102	1.00169	-2.26693	2.58982	5.87093	0.977691	0.329362	0.00540986	0.327445
TYRO3	12692693	6.35694	0.0525909	6.49348	0.0525909	6.44791	0.0525909	6.6252	0.0525909	4.51168	0.0243833	1.09926	1.06508	1.20435	-1.03209	1.0956	1.13076	0.977691	0.055811	0.70514	0.0114078
LOC540047	12914271	7.15594	0.101777	7.00723	0.101777	7.392	0.101777	7.47916	0.101777	4.51044	0.0244034	-1.10858	1.17777	1.25112	1.30565	1.38696	1.06228	0.977691	0.00456226	0.269106	0.767543
LOC618523	12730075	6.76584	0.127206	6.49283	0.127206	6.57238	0.127206	7.0995	0.127206	4.50879	0.0244302	-1.20832	-1.1435	1.2602	1.05668	1.52273	1.44105	0.977691	0.130307	0.00845326	0.337602
LOC100296495	12708768	7.01386	0.0666739	6.80591	0.0666739	6.90277	0.0666739	7.13391	0.0666739	4.50617	0.0244727	-1.15504	-1.08004	1.08677	1.06944	1.25527	1.17376	0.977691	0.129775	0.00642611	0.864838
	12914129	7.72562	0.0489193	7.76189	0.0489193	7.55544	0.0489193	7.57764	0.0489193	4.50061	0.0245635	1.02546	-1.12521	-1.10802	-1.15385	-1.13623	1.01551	0.977691	0.0034972	0.888118	0.561171
PRP4	12804741	5.43414	0.0794877	5.33302	0.0794877	5.32441	0.0794877	5.68603	0.0794877	4.49987	0.0245755	-1.07261	-1.07903	1.19077	-1.00599	1.27722	1.28487	0.977691	0.151868	0.0130617	0.127228
HSPA6	12846968	6.8943	0.311176	6.78064	0.311176	8.17824	0.311176	6.91519	0.311176	4.49972	0.0245781	-1.08197	2.43503	1.01459	2.63463	1.09775	-2.40002	0.977691	0.0417357	0.089565	0.0471019
MIR2337	12760490	9.68898	0.138782	9.49567	0.138782	9.6723	0.138782	10.1811	0.138782	4.49856	0.0245971	-1.14339	-1.01163	1.40651	1.13025	1.60819	1.42286	0.977691	0.0329498	0.026441	0.277889
HIAT1	12844977	12.5076	0.0566949	12.2651	0.0566949	12.3473	0.0566949	12.2419	0.0566949	4.4974	0.024616	-1.183	-1.11752	-1.20222	1.05859	-1.01625	-1.07579	0.977691	0.131467	0.250071	0.00975779
	12768474	17.3706	0.181503	16.8516	0.181503	16.9684	0.181503	17.6916	0.181503	4.49331	0.0246833	-1.43289	-1.32148	1.24924	1.08431	1.79002	1.65084	0.977691	0.251017	0.00506195	0.583978
RGS2	12739391	14.2212	0.308412	13.5091	0.308412	14.8582	0.308412	13.4927	0.308412	4.49307	0.0246872	-1.63813	1.55512	-1.65692	2.54749	-1.01147	-2.5767	0.977691	0.334233	0.310268	0.00558898
COL27A1	12890230	9.1724	0.0907998	9.32356	0.0907998	9.01388	0.0907998	9.46011	0.0907998	4.49203	0.0247042	1.11046	-1.11614	1.2207	-1.23943	1.09928	1.36248	0.977691	0.905751	0.130149	0.00646445
LOC529423	12850797	6.84042	0.0523443	6.90078	0.0523443	7.09906	0.0523443	6.96698	0.0523443	4.49187	0.0247068	1.04273	1.19634	1.09168	1.14732	1.04695	-1.09587	0.977691	0.00914231	0.0909032	0.506326
	12913253	6.59479	0.175144	6.18753	0.175144	7.07274	0.175144	6.78354	0.175144	4.48891	0.0247557	-1.32617	1.39276	1.13977	1.84703	1.51153	-1.22196	0.977691	0.00979052	0.741894	0.0700826
CD33	12748591	8.01643	0.123812	8.18728	0.123812	8.38175	0.123812	8.62657	0.123812	4.48835	0.0247648	1.12572	1.28816	1.52641	1.1443	1.35593	1.18495	0.977691	0.00696555	0.770257	0.119046
LOC788289	12888521	9.21795	0.111064	8.72841	0.111064	9.22908	0.111064	9.00228	0.111064	4.48192	0.0248714	-1.40401	1.00774	-1.16125	1.41488	1.20905	-1.17024	0.977691	0.223702	0.259763	0.0072872
LOC100335827	12914655	7.01272	0.0374746	7.19595	0.0374746	7.15196	0.0374746	7.14803	0.0374746	4.48101	0.0248864	1.13542	1.10132	1.09832	-1.03096	-1.03378	-1.00273	0.977691	0.246525	0.0280615	0.0339935
LOC508486	12816094	7.44488	0.0964261	7.082	0.0964261	7.33517	0.0964261	7.5597	0.0964261	4.4777	0.0249415	-1.28599	-1.07901	1.08284	1.19183	1.39252	1.16839	0.977691	0.08058	0.0101622	0.486849
	12726861	14.9531	0.276489	13.6498	0.276489	14.7719	0.276489	14.2587	0.276489	4.47663	0.0249592	-2.46793	-1.13389	-1.61824	2.17652	1.52507	-1.42716	0.977691	0.454328	0.178544	0.0065213
PIK3AP1	12821158	14.0714	0.0923351	14.2415	0.0923351	13.7765	0.0923351	13.96	0.0923351	4.47148	0.0250453	1.1251	-1.22684	-1.08031	-1.38032	-1.21546	1.13564	0.977691	0.00882999	0.943139	0.0796981
DCAF10	12889977	9.90909	0.0760232	10.0608	0.0760232	9.71796	0.0760232	9.73899	0.0760232	4.47112	0.0250512	1.11092	-1.14166	-1.12513	-1.26829	-1.24993	1.01469	0.977691	0.00553099	0.406773	0.277956
LOC100336637	12902637	6.62478	0.0850181	6.7968	0.0850181	6.99897	0.0850181	6.99578	0.0850181	4.47006	0.0250689	1.12663	1.29611	1.29325	1.15043	1.14789	-1.00221	0.977691	0.00556141	0.323151	0.340362
MMP2	12749561	8.45926	0.085012	8.46068	0.085012	8.83681	0.085012	8.63986	0.085012	4.46859	0.0250936	1.00098	1.29914	1.13335	1.29786	1.13224	-1.14628	0.977691	0.0066487	0.26597	0.272512
C3H1orf146	12843099	6.40427	0.0797573	6.30215	0.0797573	6.24181	0.0797573	6.62543	0.0797573	4.46776	0.0251075	-1.07335	-1.11919	1.16567	-1.04271	1.25117	1.30461	0.977691	0.333242	0.0101776	0.103019
	12913185	5.99802	0.081448	5.93769	0.081448	6.15886	0.081448	6.3208	0.081448	4.46722	0.0251165	-1.04271	1.11794	1.25074	1.16568	1.30415	1.11879	0.977691	0.00589596	0.197455	0.544472
LOC100337418	12852834	6.95437	0.0446465	7.1405	0.0446465	7.14642	0.0446465	7.01882	0.0446465	4.46508	0.0251525	1.13771	1.14239	1.04568	1.00411	-1.088	-1.09248	0.977691	0.445939	0.00427438	0.52456
TMEM42	12800371	8.31829	0.0766576	8.24969	0.0766576	8.15783	0.0766576	8.53781	0.0766576	4.45962	0.0252444	-1.0487	-1.11765	1.16434	-1.06575	1.22104	1.30133	0.977691	0.421351	0.0127011	0.0650125
LOC615935	12806751	6.68701	0.0821434	6.76714	0.0821434	6.38888	0.0821434	6.73438	0.0821434	4.45921	0.0252514	1.05712	-1.22955	1.03338	-1.29977	-1.02297	1.27059	0.977691	0.0669797	0.132226	0.0236242
PCF11	12833481	12.8841	0.207145	12.9453	0.207145	13.7819	0.207145	12.898	0.207145	4.45417	0.0253366	1.04337	1.86329	1.00972	1.78584	-1.03333	-1.84536	0.977691	0.0625365	0.0415752	0.0703996
LOC789790	12766396	7.69183	0.0989366	8.1283	0.0989366	7.67929	0.0989366	7.82972	0.0989366	4.45304	0.0253558	1.35329	-1.00873	1.10029	-1.3651	-1.22993	1.1099	0.977691	0.141858	0.173903	0.0117881
KLHL10	12765211	5.6785	0.0834299	5.84729	0.0834299	5.63901	0.0834299	6.02362	0.0834299	4.44835	0.0254355	1.12412	-1.02776	1.27025	-1.15532	1.13	1.30551	0.977691	0.428196	0.220204	0.00614911
KCNK17	12804580	7.4066	0.0688343	7.68405	0.0688343	7.73368	0.0688343	7.64534	0.0688343	4.44491	0.0254941	1.21205	1.25447	1.17997	1.035	-1.02719	-1.06314	0.977691	0.0580886	0.0209058	0.194643
PKP3	12833876	7.01127	0.0822121	6.86318	0.0822121	7.28164	0.0822121	7.06077	0.0822121	4.44364	0.0255157	-1.1081	1.20611	1.0349	1.3365	1.14678	-1.16543	0.977691	0.0147315	0.665913	0.0444805
DLX2	12777335	6.2459	0.0537166	6.02154	0.0537166	6.27246	0.0537166	6.15516	0.0537166	4.44334	0.0255209	-1.16826	1.01858	-1.06492	1.18997	1.09704	-1.0847	0.977691	0.161786	0.338633	0.00791776
C23H6ORF47	12803643	9.08013	0.0806974	9.01487	0.0806974	9.34089	0.0806974	8.95478	0.0806974	4.43979	0.0255816	-1.04627	1.19811	-1.09077	1.25355	-1.04253	-1.30686	0.977691	0.237478	0.070111	0.0161447
LOC523153	12782200	13.0775	0.203471	13.5755	0.203471	12.6233	0.203471	13.453	0.203471	4.43958	0.0255852	1.4123	-1.37002	1.29731	-1.93489	-1.08864	1.77735	0.977691	0.181857	0.430927	0.00679312
OSGIN1	12754390	7.69691	0.0582331	7.64509	0.0582331	7.65969	0.0582331	7.90862	0.0582331	4.43623	0.0256428	-1.03657	-1.02613	1.15806	1.01017	1.20042	1.18833	0.977691	0.0758171	0.0239961	0.116344
DNAJB1	12880985	12.1844	0.430365	12.2095	0.430365	14.0273	0.430365	12.2548	0.430365	4.43152	0.0257239	1.01755	3.58712	1.04999	3.52525	1.03188	-3.41634	0.977691	0.0486922	0.0587415	0.0651193
RTKN	12702117	7.53442	0.093708	7.27937	0.093708	7.28432	0.093708	7.68058	0.093708	4.4315	0.0257243	-1.19337	-1.18929	1.10662	1.00343	1.32061	1.31609	0.977691	0.435784	0.00458715	0.465686
FLRT3	12720176	5.45542	0.0686235	5.76193	0.0686235	5.57116	0.0686235	5.45632	0.0686235	4.42986	0.0257524	1.23672	1.08354	1.00062	-1.14137	-1.23595	-1.08286	0.977691	0.191738	0.00971491	0.187854
SLC27A6	12886948	7.10803	0.0823402	7.03925	0.0823402	6.91206	0.0823402	7.32599	0.0823402	4.42933	0.0257617	-1.04883	-1.14549	1.16308	-1.09217	1.21987	1.33231	0.977691	0.59166	0.0125775	0.0579676
MIRLET7B	12856330	6.4507	0.140398	6.97061	0.140398	6.758	0.140398	6.31789	0.140398	4.42763	0.025791	1.43387	1.23739	-1.09643	-1.15879	-1.57213	-1.3567	0.977691	0.242209	0.00508896	0.781095
LOC522954	12885825	5.8228	0.176937	5.55513	0.176937	6.44363	0.176937	5.92906	0.176937	4.42511	0.0258347	-1.20386	1.53776	1.07644	1.85126	1.29588	-1.42857	0.977691	0.0157179	0.498653	0.0472369
SCXB	12726022	7.2826	0.0743484	7.33736	0.0743484	7.58186	0.0743484	7.57412	0.0743484	4.42374	0.0258584	1.03868	1.23051	1.22393	1.18469	1.17835	-1.00538	0.977691	0.00361391	0.681693	0.75731
REL	12699543	13.9407	0.157528	14.1336	0.157528	14.5586	0.157528	13.7963	0.157528	4.41786	0.0259608	1.14308	1.53469	-1.10527	1.3426	-1.26341	-1.69625	0.977691	0.39059	0.010426	0.0958196
LOC510927	12809508	7.30058	0.0923618	7.24505	0.0923618	6.8666	0.0923618	7.18196	0.0923618	4.41687	0.025978	-1.03925	-1.35096	-1.0857	-1.29994	-1.0447	1.24432	0.977691	0.0196377	0.067717	0.184931
RNF34	12745962	9.97763	0.0787078	9.69684	0.0787078	9.93587	0.0787078	9.65049	0.0787078	4.41659	0.0259829	-1.21485	-1.02937	-1.25452	1.18019	-1.03265	-1.21873	0.977691	0.585951	0.97718	0.00366866
MIP	12856721	7.31634	0.109884	7.12159	0.109884	7.40796	0.109884	7.67728	0.109884	4.41655	0.0259835	-1.14452	1.06557	1.28427	1.21957	1.46987	1.20524	0.977691	0.0122475	0.0563701	0.740223
	12913627	7.39078	0.18218	6.63265	0.18218	7.17733	0.18218	6.64411	0.18218	4.41652	0.0259841	-1.69131	-1.15946	-1.67792	1.4587	1.00798	-1.44715	0.977691	0.589513	0.548565	0.0040397
LOC783090	12899051	7.71404	0.0879757	7.39884	0.0879757	7.40505	0.0879757	7.72978	0.0879757	4.41548	0.0260022	-1.24419	-1.23885	1.01096	1.00431	1.25783	1.25243	0.977691	0.902831	0.00340656	0.957741
LOC100296842	12713294	14.5526	0.0696842	14.4307	0.0696842	14.754	0.0696842	14.458	0.0696842	4.41411	0.0260261	-1.08815	1.14981	-1.06775	1.25117	1.0191	-1.22771	0.977691	0.126733	0.235408	0.0111044
MTHFD2	12706002	11.4328	0.153176	11.7134	0.153176	10.9721	0.153176	11.1708	0.153176	4.41403	0.0260276	1.21466	-1.37619	-1.19912	-1.67159	-1.45652	1.14766	0.977691	0.00664552	0.79387	0.143705
SHD	12885640	7.36415	0.096612	7.42603	0.096612	7.3476	0.096612	6.97898	0.096612	4.41355	0.026036	1.04382	-1.01154	-1.30602	-1.05586	-1.36325	-1.29112	0.977691	0.0335622	0.0457787	0.138377
MIR448	12902546	5.61259	0.0671255	5.78571	0.0671255	5.44379	0.0671255	5.65395	0.0671255	4.41303	0.0260451	1.1275	-1.12412	1.02909	-1.26744	-1.09563	1.15682	0.977691	0.0448976	0.787346	0.014488
RPS14	12744019	8.90305	0.195674	9.84722	0.195674	9.20687	0.195674	9.08162	0.195674	4.41285	0.0260483	1.92408	1.23441	1.13176	-1.5587	-1.70008	-1.0907	0.977691	0.260877	0.0181767	0.0583105
MRPL44	12777646	8.93571	0.0869843	9.07458	0.0869843	8.7977	0.0869843	8.64899	0.0869843	4.41044	0.0260904	1.10104	-1.10038	-1.21986	-1.21157	-1.34312	-1.10858	0.977691	0.00709102	0.124216	0.955825
HSD11B2	12749479	7.28083	0.0740238	7.15193	0.0740238	7.23235	0.0740238	7.51387	0.0740238	4.41018	0.0260951	-1.09346	-1.03417	1.17531	1.05733	1.28515	1.21547	0.977691	0.0557999	0.0168945	0.322941
	12915632	4.45931	0.0434812	4.6193	0.0434812	4.47408	0.0434812	4.40581	0.0434812	4.40778	0.0261371	1.11728	1.01029	-1.03778	-1.1059	-1.15949	-1.04846	0.977691	0.041296	0.0221905	0.312319
CALCR	12855650	5.95148	0.07852	6.07382	0.07852	6.32808	0.07852	6.21889	0.07852	4.40529	0.026181	1.0885	1.29828	1.20365	1.19272	1.10579	-1.07862	0.977691	0.00608846	0.166136	0.934622
LRRIQ3	12839086	5.60074	0.0457564	5.82643	0.0457564	5.6563	0.0457564	5.69552	0.0457564	4.40326	0.0262168	1.16934	1.03927	1.06791	-1.12516	-1.09498	1.02756	0.977691	0.426427	0.0642546	0.0134553
FKBP15	12895808	11.0675	0.103604	11.3236	0.103604	10.7914	0.103604	11.0594	0.103604	4.4004	0.0262672	1.19427	-1.21092	-1.0056	-1.44616	-1.20095	1.20418	0.977691	0.0229114	0.955054	0.0264341
GALNT4	12863303	8.03106	0.0538243	8.07056	0.0538243	7.81392	0.0538243	7.96737	0.0538243	4.39588	0.0263472	1.02776	-1.16242	-1.04513	-1.19469	-1.07414	1.11223	0.977691	0.0115799	0.310654	0.0982871
LOC100295623	12748854	6.92378	0.11984	6.51508	0.11984	6.61544	0.11984	6.32293	0.11984	4.3849	0.0265427	-1.32749	-1.23828	-1.51661	1.07204	-1.14246	-1.22477	0.977691	0.0587683	0.63656	0.0127066
LOC788587	12730419	6.81576	0.24328	6.86793	0.24328	7.2641	0.24328	7.91942	0.24328	4.38428	0.0265539	1.03683	1.36447	2.14899	1.31601	2.07267	1.57497	0.977691	0.00949353	0.238813	0.171578
LOC527779	12850751	6.68902	0.176792	6.02841	0.176792	6.57315	0.176792	6.89516	0.176792	4.38335	0.0265705	-1.58076	-1.08363	1.1536	1.45876	1.82356	1.25007	0.977691	0.0551765	0.0166796	0.357143
MGC137452	12854315	8.73162	0.382355	8.73394	0.382355	7.04298	0.382355	8.32234	0.382355	4.38026	0.0266259	1.0016	-3.22353	-1.32803	-3.2287	-1.33016	2.4273	0.977691	0.0177184	0.120783	0.119573
LOC783564	12687183	7.21535	0.169724	6.91461	0.169724	7.73197	0.169724	7.50803	0.169724	4.37806	0.0266654	-1.23177	1.4306	1.22492	1.76218	1.50882	-1.16792	0.977691	0.0067014	0.82482	0.148135
LOC100297127	12745094	5.45207	0.0612753	5.64509	0.0612753	5.34307	0.0612753	5.53679	0.0612753	4.36758	0.0268545	1.14315	-1.07849	1.06048	-1.23287	-1.07796	1.14371	0.977691	0.101556	0.995473	0.00828652
ROR1	12848043	10.061	0.142762	9.71579	0.142762	9.37298	0.142762	9.91723	0.142762	4.36525	0.0268969	-1.27038	-1.61112	-1.10482	-1.26822	1.14985	1.45826	0.977691	0.114053	0.00893189	0.499117
PPM1K	12872195	8.20404	0.0869629	8.3379	0.0869629	8.43968	0.0869629	8.63496	0.0869629	4.36236	0.0269495	1.09723	1.17743	1.3481	1.07309	1.22864	1.14495	0.977691	0.00984717	0.73011	0.082795
SURF6	12705380	9.21079	0.120695	9.53273	0.120695	8.98898	0.120695	9.01046	0.120695	4.35824	0.0270247	1.25001	-1.16619	-1.14896	-1.45775	-1.43621	1.015	0.977691	0.00949497	0.237002	0.180297
LOC516666	12904242	4.7969	0.0694014	4.78116	0.0694014	4.70495	0.0694014	5.03927	0.0694014	4.3538	0.0271058	-1.01097	-1.06581	1.18293	-1.05424	1.19591	1.26078	0.977691	0.25439	0.0268099	0.0405497
CSDA	12860942	13.6782	0.263948	12.4965	0.263948	12.9839	0.263948	12.5311	0.263948	4.35156	0.0271469	-2.2684	-1.6181	-2.21468	1.40189	1.02426	-1.36869	0.977691	0.235225	0.192541	0.009255
LOC521764	12715522	7.75835	0.0621511	8.06584	0.0621511	7.88528	0.0621511	7.84365	0.0621511	4.35032	0.0271696	1.23756	1.09197	1.06091	-1.13333	-1.16651	-1.02928	0.977691	0.458263	0.0157863	0.0537022
LOC787249	12703294	7.15855	0.15281	7.24629	0.15281	7.10372	0.15281	6.5431	0.15281	4.34883	0.0271971	1.0627	-1.03874	-1.53204	-1.10387	-1.6281	-1.4749	0.977691	0.0289417	0.0553938	0.147751
SLC29A2	12834341	7.70162	0.105746	7.40393	0.105746	7.85524	0.105746	7.88615	0.105746	4.34794	0.0272135	-1.22917	1.11236	1.13645	1.36728	1.39689	1.02166	0.977691	0.0109351	0.146217	0.231138
LOC514233	12844716	6.78051	0.158977	6.4291	0.158977	6.1483	0.158977	6.03795	0.158977	4.34772	0.0272174	-1.2758	-1.54994	-1.67314	-1.21487	-1.31144	-1.07949	0.977691	0.0073738	0.462987	0.172069
LOC100336610	12906673	6.39935	0.0774943	6.73702	0.0774943	6.56044	0.0774943	6.39724	0.0774943	4.34654	0.0272392	1.26371	1.11814	-1.00146	-1.13019	-1.26555	-1.11977	0.977691	0.271436	0.00719738	0.282311
LOC100336001	12914677	8.62576	0.079554	8.40643	0.079554	8.7733	0.079554	8.74002	0.079554	4.34409	0.0272844	-1.1642	1.10768	1.08242	1.28955	1.26015	-1.02334	0.977691	0.0105855	0.264961	0.138341
LOC788653	12835281	6.24504	0.111248	6.72469	0.111248	6.46248	0.111248	6.23019	0.111248	4.34182	0.0273264	1.39441	1.16267	-1.01035	-1.19932	-1.40883	-1.1747	0.977691	0.236803	0.00763535	0.288012
C3H1orf88	12847675	5.75769	0.11016	5.93397	0.11016	6.06224	0.11016	6.30306	0.11016	4.33957	0.027368	1.12997	1.23504	1.4594	1.09298	1.29154	1.18166	0.977691	0.00994353	0.774573	0.0826964
LOC787671	12730404	7.91498	0.130036	7.50272	0.130036	8.06029	0.130036	8.09113	0.130036	4.33762	0.0274042	-1.33076	1.10597	1.12987	1.47179	1.50359	1.02161	0.977691	0.0154246	0.114167	0.168203
MGC133647	12808802	5.95793	0.0580455	5.71662	0.0580455	5.75837	0.0580455	5.69246	0.0580455	4.33328	0.0274849	-1.18206	-1.14835	-1.20203	1.02936	-1.01689	-1.04675	0.977691	0.0779664	0.156706	0.0213214
LOC539875	12803265	11.364	0.214078	11.2434	0.214078	10.4187	0.214078	10.7117	0.214078	4.33165	0.0275153	-1.08721	-1.92559	-1.57164	-1.77114	-1.44558	1.22521	0.977691	0.00480894	0.353053	0.694282
PNN	12889202	8.20396	0.0576253	8.1043	0.0576253	8.38415	0.0576253	8.29309	0.0576253	4.3315	0.0275181	-1.07153	1.13303	1.06373	1.21407	1.13981	-1.06515	0.977691	0.00761007	0.941713	0.12384
MIR539	12788840	9.7598	0.137637	9.54078	0.137637	10.2205	0.137637	9.75577	0.137637	4.33097	0.027528	-1.16395	1.37624	-1.0028	1.60186	1.1607	-1.38009	0.977691	0.0303307	0.389568	0.0287452
LOC538744	12733063	6.13609	0.14361	5.4349	0.14361	5.78823	0.14361	5.958	0.14361	4.33038	0.027539	-1.62585	-1.27267	-1.13138	1.27751	1.43705	1.12488	0.977691	0.55314	0.0104197	0.0890472
CORT	12741412	7.75931	0.0708933	7.8274	0.0708933	7.62995	0.0708933	7.98423	0.0708933	4.32855	0.0275731	1.04833	-1.09381	1.16871	-1.14667	1.11483	1.27835	0.977691	0.849605	0.0664673	0.0115086
MIR196B	12848622	5.37996	0.114926	5.50661	0.114926	5.84835	0.114926	5.84638	0.114926	4.32322	0.0276731	1.09175	1.38357	1.38167	1.26729	1.26555	-1.00137	0.977691	0.00425459	0.58604	0.597485
TICAM2	12696639	10.3249	0.130281	10.3539	0.130281	9.76927	0.130281	10.0868	0.130281	4.32195	0.0276968	1.02028	-1.46985	-1.17949	-1.49965	-1.2034	1.24618	0.977691	0.0082554	0.289815	0.208336
PLEKHG3	12689784	7.19155	0.0756559	7.08752	0.0756559	7.2629	0.0756559	7.46027	0.0756559	4.32085	0.0277175	-1.07477	1.0507	1.20474	1.12926	1.29482	1.14661	0.977691	0.0124878	0.0696334	0.548792
LOC785752	12697736	5.44302	0.0958141	5.83021	0.0958141	5.41951	0.0958141	5.43508	0.0958141	4.31704	0.0277893	1.30784	-1.01643	-1.00552	-1.32933	-1.31507	1.01085	0.977691	0.0494767	0.0763383	0.0573648
LOC526311	12728534	6.3366	0.134865	6.31271	0.134865	6.91832	0.134865	6.53043	0.134865	4.31205	0.0278836	-1.01669	1.49664	1.14379	1.52162	1.16289	-1.30849	0.977691	0.0118363	0.202073	0.152767
CHID1	12829713	9.7608	0.0927884	9.4687	0.0927884	9.6933	0.0927884	9.93431	0.0927884	4.31023	0.027918	-1.22442	-1.0479	1.1278	1.16845	1.38091	1.18183	0.977691	0.0530895	0.0140178	0.787796
KLHL2	12743577	11.9816	0.0890793	11.6759	0.0890793	11.9088	0.0890793	11.5933	0.0890793	4.3083	0.0279546	-1.23606	-1.05174	-1.30887	1.17526	-1.05891	-1.24449	0.977691	0.400332	0.957038	0.00448527
MIR381	12788782	7.19682	0.14883	6.88721	0.14883	7.63637	0.14883	7.1784	0.14883	4.30826	0.0279554	-1.23937	1.35618	-1.01285	1.68081	1.22365	-1.37361	0.977691	0.0303188	0.627209	0.0241552
ADIG	12714706	7.01401	0.078948	7.21129	0.078948	7.11491	0.078948	7.3987	0.078948	4.30557	0.0280067	1.14654	1.07245	1.30558	-1.06909	1.13871	1.21738	0.977691	0.092829	0.593853	0.0101464
PCDH18	12744054	8.60199	0.200046	9.39779	0.200046	9.12119	0.200046	9.54419	0.200046	4.30523	0.028013	1.73604	1.43316	1.92145	-1.21133	1.1068	1.34071	0.977691	0.122065	0.36981	0.0101546
LOC100301205	12755430	6.97138	0.0523965	6.82049	0.0523965	7.04588	0.0523965	7.05591	0.0523965	4.30384	0.0280396	-1.11025	1.053	1.06034	1.16909	1.17725	1.00698	0.977691	0.0119768	0.150567	0.203761
ALDH1L2	12866308	7.35174	0.193604	7.97128	0.193604	8.29679	0.193604	8.04813	0.193604	4.30329	0.0280501	1.53638	1.92525	1.62044	1.25311	1.05471	-1.18811	0.977691	0.0216087	0.0446196	0.357055
C8H4orf27	12894264	7.81448	0.148011	8.44919	0.148011	7.78608	0.148011	8.06376	0.148011	4.30293	0.0280569	1.55263	-1.01988	1.18862	-1.5835	-1.30624	1.21225	0.977691	0.18743	0.251034	0.00949917
LOC521504	12854591	11.2799	0.142644	11.2889	0.142644	11.8481	0.142644	11.2123	0.142644	4.30052	0.0281028	1.00622	1.48257	-1.04799	1.4734	-1.05451	-1.55372	0.977691	0.110551	0.0432317	0.0483974
IQCF2	12799310	7.59644	0.0988917	7.55942	0.0988917	7.91222	0.0988917	7.94998	0.0988917	4.29905	0.0281309	-1.02599	1.24469	1.27769	1.27704	1.3109	1.02651	0.977691	0.00384317	0.711985	0.997116
WNK1	12858142	12.1392	0.176219	11.336	0.176219	12.0584	0.176219	11.7336	0.176219	4.29782	0.0281546	-1.74494	-1.05759	-1.32459	1.64992	1.31734	-1.25247	0.977691	0.386325	0.199634	0.00762661
TMEM2	12893870	11.588	0.134448	11.0267	0.134448	11.6093	0.134448	11.2689	0.134448	4.29319	0.0282433	-1.4756	1.01484	-1.24762	1.49749	1.18273	-1.26613	0.977691	0.346684	0.427429	0.00574356
TMEM136	12728318	7.15108	0.138178	6.812	0.138178	7.35859	0.138178	7.46054	0.138178	4.29269	0.028253	-1.26495	1.15469	1.23924	1.46062	1.56757	1.07322	0.977691	0.0092311	0.136507	0.407678
BOSTAUV1R421	12748526	6.69527	0.136903	7.01979	0.136903	7.35206	0.136903	7.207	0.136903	4.29087	0.0282881	1.25225	1.57658	1.42575	1.259	1.13856	-1.10578	0.977691	0.00949397	0.112022	0.524587
TPMT	12801716	10.5427	0.178473	9.94108	0.178473	10.8218	0.178473	10.3548	0.178473	4.29069	0.0282914	-1.51747	1.21337	-1.13915	1.84126	1.33211	-1.38221	0.977691	0.076145	0.712505	0.0111937
LOC615291	12905700	6.89627	0.0801069	7.25138	0.0801069	7.22945	0.0801069	7.19304	0.0801069	4.29052	0.0282948	1.27908	1.25979	1.22839	-1.01531	-1.04127	-1.02556	0.977691	0.11194	0.030945	0.0699711
KCND3	12840713	8.20113	0.101642	8.05072	0.101642	8.35481	0.101642	8.5422	0.101642	4.28888	0.0283263	-1.10989	1.1124	1.26669	1.23464	1.40589	1.1387	0.977691	0.00801476	0.122447	0.858707
LTA	12804382	6.24918	0.0904571	5.94399	0.0904571	6.36732	0.0904571	6.30125	0.0904571	4.28782	0.0283469	-1.23558	1.08533	1.03675	1.34102	1.28099	-1.04686	0.977691	0.0220665	0.210893	0.0626354
LOC504551	12726994	7.94839	0.22791	7.16731	0.22791	8.04499	0.22791	8.24284	0.22791	4.28727	0.0283574	-1.71842	1.06925	1.22642	1.83741	2.10749	1.14699	0.977691	0.02448	0.0528669	0.224903
PACSIN1	12802321	7.33188	0.0620652	7.46529	0.0620652	7.54342	0.0620652	7.63525	0.0620652	4.28343	0.0284317	1.09688	1.15792	1.23402	1.05565	1.12503	1.06572	0.977691	0.00965592	0.74346	0.0946622
PLAUR	12755776	7.72002	0.319308	7.33193	0.319308	8.81478	0.319308	7.5434	0.319308	4.28309	0.0284382	-1.30866	2.13578	-1.13023	2.79501	1.15787	-2.41393	0.977691	0.0633823	0.191815	0.023288
HRH1	12794337	5.57142	0.0786684	5.26595	0.0786684	5.61131	0.0786684	5.58678	0.0786684	4.2812	0.0284748	-1.23582	1.02804	1.0107	1.27047	1.24904	-1.01715	0.977691	0.0407361	0.0994476	0.0578084
	12915637	4.36276	0.0221701	4.43083	0.0221701	4.33816	0.0221701	4.32959	0.0221701	4.28093	0.0284801	1.04831	-1.0172	-1.02326	-1.06634	-1.0727	-1.00596	0.977691	0.0149489	0.109535	0.204487
TRAF5	12738945	10.6469	0.15315	10.3785	0.15315	10.9483	0.15315	10.2279	0.15315	4.28063	0.0284859	-1.20445	1.23238	-1.33698	1.48434	-1.11003	-1.64767	0.977691	0.631261	0.16574	0.00724348
MEAF6	12840918	13.0681	0.112772	13.0601	0.112772	12.6337	0.112772	12.6908	0.112772	4.27613	0.0285735	-1.00554	-1.35133	-1.29891	-1.34388	-1.29175	1.04035	0.977691	0.00389941	0.77795	0.831323
LOC784927	12721279	6.1446	0.138342	5.72431	0.138342	5.95891	0.138342	6.39935	0.138342	4.27026	0.0286881	-1.3382	-1.13736	1.19312	1.17658	1.59664	1.35701	0.977691	0.102349	0.00900621	0.943165
FEZ1	12833525	6.32093	0.116521	6.28566	0.116521	6.50467	0.116521	6.81204	0.116521	4.27012	0.0286909	-1.02475	1.13582	1.40553	1.16393	1.44032	1.23745	0.977691	0.010138	0.167201	0.265646
TMEM35	12904860	5.50561	0.0553	5.72621	0.0553	5.68326	0.0553	5.51307	0.0553	4.26511	0.028789	1.16522	1.13104	1.00518	-1.03022	-1.15921	-1.12521	0.977691	0.753816	0.00412082	0.656713
LOC617633	12915149	7.1951	0.0727178	7.18938	0.0727178	7.32411	0.0727178	7.50948	0.0727178	4.26264	0.0288377	-1.00397	1.09354	1.24347	1.09789	1.24841	1.1371	0.977691	0.00939661	0.21345	0.240399
LOC535441	12743842	9.67856	0.192495	9.66886	0.192495	9.97197	0.192495	9.02989	0.192495	4.26087	0.0288726	-1.00675	1.22553	-1.56772	1.2338	-1.55721	-1.92129	0.977691	0.387064	0.0322107	0.0293747
LOC785548	12741501	9.14043	0.0891456	9.30171	0.0891456	8.90543	0.0891456	9.2877	0.0891456	4.26035	0.0288828	1.11828	-1.1769	1.10748	-1.3161	-1.00975	1.30339	0.977691	0.187836	0.238853	0.0101101
MIR2377	12804269	9.40211	0.0787166	9.71097	0.0787166	9.50225	0.0787166	9.34003	0.0787166	4.26008	0.028888	1.23873	1.07188	-1.04397	-1.15566	-1.2932	-1.11901	0.977691	0.111075	0.0112259	0.369986
IMPA1	12721612	12.1256	0.112627	12.5973	0.112627	12.0912	0.112627	12.3217	0.112627	4.25344	0.0290194	1.38677	-1.02413	1.14566	-1.42023	-1.21046	1.1733	0.977691	0.193957	0.305423	0.0088907
	12915636	4.22388	0.0231333	4.30926	0.0231333	4.21269	0.0231333	4.20793	0.0231333	4.24899	0.0291079	1.06097	-1.00779	-1.01112	-1.06923	-1.07276	-1.0033	0.977691	0.0316139	0.0751602	0.106953
ISOC1	12887383	10.1253	0.109139	9.83672	0.109139	9.70641	0.109139	9.60688	0.109139	4.24789	0.0291298	-1.22142	-1.33688	-1.43237	-1.09453	-1.17271	-1.07143	0.977691	0.0116588	0.403472	0.100734
LOC540449	12791012	6.96105	0.125464	7.44757	0.125464	7.23568	0.125464	6.88502	0.125464	4.24689	0.0291498	1.40106	1.20968	-1.05411	-1.1582	-1.47687	-1.27514	0.977691	0.273571	0.00592849	0.598121
ITGB6	12774621	6.76371	0.0890209	6.91936	0.0890209	7.06965	0.0890209	7.1862	0.0890209	4.2452	0.0291834	1.11393	1.23623	1.34024	1.10979	1.20317	1.08414	0.977691	0.00739365	0.829844	0.152223
LOC100336400	12713443	16.223	0.0549127	16.161	0.0549127	16.348	0.0549127	16.0797	0.0549127	4.24361	0.0292152	-1.04391	1.09045	-1.10449	1.13833	-1.05803	-1.20439	0.977691	0.698669	0.0848261	0.0109135
RBM18	12704860	11.1019	0.106291	10.7965	0.106291	10.9011	0.106291	10.5762	0.106291	4.24143	0.0292588	-1.23576	-1.14926	-1.43963	1.07527	-1.16498	-1.25266	0.977691	0.0710533	0.928061	0.0118009
GPATCH8	12771822	11.912	0.0701784	11.8714	0.0701784	12.1052	0.0701784	11.7581	0.0701784	4.24025	0.0292825	-1.02856	1.14326	-1.11259	1.17591	-1.0817	-1.27198	0.977691	0.579911	0.049594	0.0172074
RG9MTD3	12890428	10.3591	0.272163	9.31949	0.272163	10.6104	0.272163	10.173	0.272163	4.23567	0.0293745	-2.05571	1.19028	-1.13769	2.44686	1.80692	-1.35416	0.977691	0.0651607	0.290244	0.0188327
EIF4G2	12726841	16.5863	0.0672898	16.2696	0.0672898	16.4472	0.0672898	16.3368	0.0672898	4.23564	0.029375	-1.24548	-1.10126	-1.18882	1.13096	1.04766	-1.07951	0.977691	0.602548	0.151181	0.00801883
	12914289	7.73602	0.332501	9.109	0.332501	7.81357	0.332501	7.68464	0.332501	4.23408	0.0294063	2.59005	1.05522	-1.03626	-2.4545	-2.68396	-1.09348	0.977691	0.0656726	0.0433275	0.0859587
LOC787564	12733974	6.84818	0.0836372	6.57742	0.0836372	6.81984	0.0836372	6.99222	0.0836372	4.23398	0.0294084	-1.20644	-1.01984	1.105	1.18298	1.33312	1.12692	0.977691	0.039449	0.0212106	0.567375
LOC100336710	12863747	10.6657	0.092403	10.7899	0.092403	10.34	0.092403	10.5738	0.092403	4.23335	0.0294211	1.08994	-1.25325	-1.06575	-1.36597	-1.16161	1.17593	0.977691	0.0125637	0.56433	0.0765849
LOC100337251	12827550	9.97929	0.120928	10.5807	0.120928	10.2211	0.120928	10.203	0.120928	4.23154	0.0294576	1.51722	1.1825	1.16773	-1.28307	-1.29929	-1.01264	0.977691	0.584565	0.0249249	0.0328045
EEPD1	12853913	8.47558	0.0699445	8.22791	0.0699445	8.22438	0.0699445	8.47504	0.0699445	4.2304	0.0294805	-1.18729	-1.1902	-1.00038	-1.00245	1.18684	1.18975	0.977691	0.977212	0.00390737	0.983299
IFRD1	12855628	10.1732	0.267968	9.79172	0.267968	11.0821	0.267968	10.1418	0.267968	4.22962	0.0294963	-1.30267	1.87765	-1.02201	2.44597	1.27461	-1.91899	0.977691	0.0367701	0.317598	0.02969
LOC100138998	12906387	6.31442	0.174453	6.14612	0.174453	6.91512	0.174453	6.73977	0.174453	4.22942	0.0295005	-1.12374	1.51645	1.3429	1.70409	1.50906	-1.12924	0.977691	0.00504942	0.984217	0.344096
MAPK4	12808069	6.43705	0.0836929	6.44702	0.0836929	6.46575	0.0836929	6.79315	0.0836929	4.22447	0.0296007	1.00694	1.02009	1.27997	1.01307	1.27115	1.25475	0.977691	0.0448509	0.0822372	0.0668033
	12913881	5.85411	0.0566236	6.03104	0.0566236	5.92283	0.0566236	6.11743	0.0566236	4.2211	0.0296692	1.13048	1.04879	1.20024	-1.07789	1.06171	1.1444	0.977691	0.195878	0.878637	0.00657159
LOC100336307	12915231	7.96237	0.109305	8.13431	0.109305	8.48194	0.109305	8.0714	0.109305	4.21821	0.029728	1.12657	1.43354	1.07851	1.27247	-1.04457	-1.32919	0.977691	0.0586818	0.0206193	0.296507
RNF220	12847532	13.2375	0.123505	13.5754	0.123505	12.955	0.123505	13.2558	0.123505	4.21779	0.0297365	1.26396	-1.21632	1.01277	-1.53738	-1.24803	1.23185	0.977691	0.0312796	0.883026	0.0238312
KRTAP10-12	12682480	8.83341	0.179666	8.5782	0.179666	9.38571	0.179666	9.23288	0.179666	4.21766	0.0297392	-1.19351	1.46642	1.31902	1.75018	1.57426	-1.11175	0.977691	0.00568555	0.780565	0.278317
RAB5A	12681972	14.1769	0.0949011	13.7124	0.0949011	14.0314	0.0949011	13.9375	0.0949011	4.2161	0.0297711	-1.37991	-1.10611	-1.18054	1.24753	1.16888	-1.06729	0.977691	0.682252	0.0745772	0.0123108
MAMLD1	12902272	7.89211	0.0894797	7.72147	0.0894797	8.01851	0.0894797	7.6021	0.0894797	4.21603	0.0297724	-1.12556	1.09156	-1.22265	1.22862	-1.08626	-1.3346	0.977691	0.969333	0.194766	0.00657616
HSCB	12744865	8.80494	0.0697035	8.62923	0.0697035	8.75267	0.0697035	8.48354	0.0697035	4.21597	0.0297737	-1.12952	-1.0369	-1.24955	1.08933	-1.10626	-1.20508	0.977691	0.181044	0.515457	0.00776167
LOC789138	12741554	6.01975	0.119578	5.79461	0.119578	6.32831	0.119578	6.27013	0.119578	4.21304	0.0298337	-1.16889	1.23846	1.18951	1.44763	1.39041	-1.04115	0.978345	0.00659899	0.4984	0.259078
ANO6	12866524	14.0663	0.161549	13.3909	0.161549	13.7617	0.161549	13.373	0.161549	4.21003	0.0298953	-1.59704	-1.23505	-1.61695	1.29309	-1.01247	-1.30921	0.979051	0.33798	0.392329	0.00641833
CLK4	12886251	12.7995	0.18712	12.6642	0.18712	13.4619	0.18712	12.6556	0.18712	4.19873	0.0301283	-1.0983	1.58271	-1.10485	1.7383	-1.00596	-1.74866	0.985361	0.106142	0.0982121	0.0271158
COMP	12876857	6.67937	0.0825718	6.84339	0.0825718	6.72011	0.0825718	6.43955	0.0825718	4.19312	0.0302449	1.1204	1.02864	-1.18085	-1.08921	-1.32302	-1.21466	0.985515	0.0482485	0.0195959	0.493863
LOC100174927	12848438	8.90084	0.154506	8.36047	0.154506	9.09918	0.154506	8.68401	0.154506	4.19279	0.0302517	-1.45435	1.14737	-1.16218	1.66868	1.2514	-1.33345	0.985515	0.117039	0.69247	0.00932346
SMAD4	12808560	13.6482	0.0686429	13.8611	0.0686429	13.6708	0.0686429	13.5204	0.0686429	4.19268	0.030254	1.15896	1.01577	-1.09268	-1.14096	-1.26637	-1.10992	0.985515	0.0389612	0.0213312	0.65769
LOC509817	12858754	7.15344	0.153425	7.17259	0.153425	7.39041	0.153425	7.82901	0.153425	4.19023	0.030305	1.01336	1.17851	1.59722	1.16297	1.57616	1.35529	0.985789	0.013045	0.196703	0.161575
BTF3L4	12846948	6.40366	0.111804	6.62789	0.111804	6.12584	0.111804	6.1842	0.111804	4.18639	0.0303853	1.16816	-1.21236	-1.1643	-1.41623	-1.36008	1.04129	0.985789	0.0072635	0.472482	0.230293
TANC2	12764103	9.00308	0.0830637	8.94601	0.0830637	8.94078	0.0830637	8.62818	0.0830637	4.18445	0.0304258	-1.04035	-1.04413	-1.29675	-1.00363	-1.24645	-1.24194	0.985789	0.0410641	0.149959	0.0460047
AASS	12854565	9.54015	0.143391	9.57146	0.143391	8.98465	0.143391	9.59629	0.143391	4.18172	0.030483	1.02194	-1.46967	1.03969	-1.50192	1.01737	1.528	0.985789	0.0890232	0.0658677	0.0446393
LOC786928	12759956	6.0091	0.0794564	5.79851	0.0794564	6.14454	0.0794564	6.14064	0.0794564	4.18148	0.030488	-1.15716	1.09843	1.09546	1.27105	1.26762	-1.00271	0.985789	0.0109605	0.217807	0.202028
LOC522410	12728403	6.23512	0.0920586	6.3747	0.0920586	6.66446	0.0920586	6.54232	0.0920586	4.1807	0.0305045	1.10159	1.34662	1.23731	1.22243	1.1232	-1.08834	0.985789	0.00705668	0.180632	0.926035
LOC513555	12893658	12.6192	0.0812591	12.3945	0.0812591	12.2149	0.0812591	12.3814	0.0812591	4.17446	0.0306359	-1.16855	-1.32352	-1.17923	-1.13261	-1.00914	1.12235	0.986232	0.0245934	0.033068	0.726479
ZFP57	12803975	7.6371	0.072376	7.91956	0.072376	7.70061	0.072376	7.92245	0.072376	4.17439	0.0306373	1.21627	1.04501	1.21871	-1.16388	1.00201	1.16622	0.986232	0.654624	0.682759	0.00451405
LOC782927	12726248	10.4526	0.130508	10.0511	0.130508	9.80577	0.130508	10.0949	0.130508	4.17399	0.0306459	-1.32086	-1.56567	-1.28134	-1.18534	1.03085	1.2219	0.986232	0.0394763	0.0213416	0.674495
CPOX	12686442	9.4102	0.133922	9.30117	0.133922	8.84618	0.133922	8.9396	0.133922	4.17233	0.0306809	-1.07851	-1.47839	-1.38569	-1.37078	-1.28482	1.0669	0.986232	0.00475425	0.464295	0.95447
DNAJA1	12890878	13.8022	0.247739	13.5258	0.247739	14.5238	0.247739	13.3888	0.247739	4.16981	0.0307343	-1.21121	1.64898	-1.33184	1.99726	-1.0996	-2.19619	0.986232	0.260914	0.108733	0.0146592
LOC615069	12808630	10.0947	0.0764607	9.73314	0.0764607	10.0171	0.0764607	9.9776	0.0764607	4.16858	0.0307605	-1.28482	-1.05523	-1.08455	1.21758	1.18465	-1.02779	0.986232	0.296487	0.0569582	0.0222615
LOC100300494	12693160	7.84175	0.0506913	7.96161	0.0506913	8.09482	0.0506913	7.96713	0.0506913	4.15818	0.0309819	1.08664	1.19175	1.0908	1.09673	1.00384	-1.09254	0.99	0.0254313	0.031056	0.939788
	12912537	7.10463	0.307666	8.27415	0.307666	8.37576	0.307666	8.40855	0.307666	4.14936	0.0311713	2.24937	2.41352	2.46901	1.07298	1.09764	1.02299	0.99	0.0413625	0.0894882	0.0744171
	12912539	7.10463	0.307666	8.27415	0.307666	8.37576	0.307666	8.40855	0.307666	4.14936	0.0311713	2.24937	2.41352	2.46901	1.07298	1.09764	1.02299	0.99	0.0413625	0.0894882	0.0744171
COX7A2	12899530	11.9938	0.115988	12.1338	0.115988	12.458	0.115988	12.4634	0.115988	4.14741	0.0312134	1.10192	1.3796	1.3848	1.25199	1.25671	1.00377	0.99	0.00505666	0.572492	0.542401
ZNF317	12877990	9.41861	0.131369	9.02852	0.131369	9.43389	0.131369	8.91284	0.131369	4.14023	0.0313688	-1.31048	1.01065	-1.41988	1.32444	-1.08348	-1.435	0.99	0.709068	0.627176	0.00464906
C12orf54	12868883	6.56529	0.0665242	6.69692	0.0665242	6.63577	0.0665242	6.88093	0.0665242	4.13539	0.0314741	1.09553	1.05006	1.24456	-1.0433	1.13603	1.18522	0.99	0.0799482	0.410203	0.0151223
LOC786119	12888285	7.3967	0.100226	6.96067	0.100226	7.15227	0.100226	7.36637	0.100226	4.13074	0.0315756	-1.35288	-1.18463	-1.02125	1.14203	1.32473	1.15998	0.99	0.436766	0.00704303	0.289918
	12756700	17.129	0.161092	16.6975	0.161092	16.6986	0.161092	17.3552	0.161092	4.13035	0.0315841	-1.34861	-1.34763	1.16973	1.00073	1.57751	1.57636	0.99	0.494108	0.00549667	0.498029
	12913451	9.98593	0.267968	10.1329	0.267968	10.9093	0.267968	11.0702	0.267968	4.12866	0.031621	1.10721	1.89661	2.12038	1.71296	1.91506	1.11798	0.99	0.00461317	0.979633	0.576321
LOC100337099	12809083	11.6652	0.163195	11.6282	0.163195	10.9812	0.163195	11.6376	0.163195	4.12819	0.0316313	-1.02592	-1.6065	-1.01932	-1.56591	1.00648	1.57606	0.99	0.0610272	0.055142	0.0820463
LRFN2	12805924	7.03074	0.0874772	7.1833	0.0874772	6.77761	0.0874772	7.11713	0.0874772	4.12777	0.0316405	1.11154	-1.19179	1.06171	-1.32472	-1.04694	1.26533	0.99	0.0929697	0.306284	0.0156743
KPNA5	12901533	7.84331	0.132443	8.35614	0.132443	8.1198	0.132443	7.76888	0.132443	4.12769	0.0316422	1.42685	1.21125	-1.05294	-1.178	-1.50239	-1.27538	0.99	0.263474	0.00681806	0.552448
LOC531816	12834355	6.10499	0.146126	6.19004	0.146126	5.96722	0.146126	6.65207	0.146126	4.12768	0.0316425	1.06072	-1.10021	1.46112	-1.16701	1.37748	1.60753	0.99	0.288948	0.0626115	0.0217994
EXOSC4	12726127	8.26254	0.0850256	8.52464	0.0850256	8.13658	0.0850256	8.18623	0.0850256	4.12622	0.0316744	1.19922	-1.09124	-1.05432	-1.30863	-1.26436	1.03502	0.99	0.0182406	0.235396	0.0916681
	12771682	18.067	0.120732	17.7702	0.120732	17.8785	0.120732	18.33	0.120732	4.12613	0.0316765	-1.22844	-1.13962	1.19993	1.07794	1.47404	1.36746	0.99	0.150138	0.0092052	0.533843
ZBTB37	12737520	10.5426	0.117858	10.9336	0.117858	10.3719	0.117858	10.7053	0.117858	4.12328	0.031739	1.31132	-1.12558	1.1194	-1.47601	-1.17145	1.25998	0.99	0.116308	0.810998	0.00965745
LOC100140733	12779866	6.78215	0.0747033	6.61716	0.0747033	6.98771	0.0747033	6.80467	0.0747033	4.12097	0.0317899	-1.12116	1.15314	1.01573	1.29285	1.1388	-1.13528	0.99	0.0219376	0.905866	0.0381063
LOC100297304	12911131	12.1764	0.074791	12.05	0.074791	12.4143	0.074791	12.2429	0.074791	4.11584	0.0319032	-1.09155	1.17927	1.04721	1.28723	1.14308	-1.12611	0.99	0.0138257	0.768811	0.0698229
CHORDC1	12829760	14.1193	0.322858	13.9661	0.322858	15.1594	0.322858	13.6458	0.322858	4.11492	0.0319237	-1.11207	2.05637	-1.38847	2.28683	-1.24855	-2.85522	0.99	0.286761	0.0568608	0.0240357
LOC614050	12841124	4.80403	0.171699	5.53193	0.171699	4.9676	0.171699	5.41101	0.171699	4.11209	0.0319863	1.65623	1.12006	1.52307	-1.4787	-1.08743	1.35981	0.99	0.903202	0.42356	0.00516437
ZNF618	12890865	9.7771	0.157699	10.4781	0.157699	9.82544	0.157699	10.0272	0.157699	4.10942	0.0320458	1.62566	1.03407	1.18929	-1.5721	-1.36691	1.15011	0.99	0.225947	0.139421	0.0142905
SEC1	12749317	6.64606	0.0696711	6.40976	0.0696711	6.67569	0.0696711	6.72904	0.0696711	4.10503	0.0321434	-1.17797	1.02075	1.05921	1.20242	1.24771	1.03767	0.99	0.0277086	0.0597608	0.213752
SPATA18	12872438	5.66392	0.0853491	5.42725	0.0853491	5.72489	0.0853491	5.83696	0.0853491	4.10328	0.0321826	-1.17827	1.04317	1.12743	1.22913	1.32842	1.08078	0.99	0.0173633	0.0636509	0.47945
LOC100140960	12734155	8.4915	0.0704805	8.51226	0.0704805	8.4634	0.0704805	8.77167	0.0704805	4.1003	0.0322493	1.0145	-1.01967	1.21433	-1.03445	1.19698	1.23822	0.99	0.126764	0.0640332	0.0377807
LOC100337211	12906907	6.92695	0.112128	6.73737	0.112128	6.76049	0.112128	7.22958	0.112128	4.0968	0.032328	-1.14043	-1.1223	1.2334	1.01616	1.4066	1.38424	0.99	0.171971	0.012438	0.236404
ISG20	12789500	7.97096	0.199772	8.48152	0.199772	7.69682	0.199772	7.56954	0.199772	4.09394	0.0323922	1.42461	-1.20927	-1.3208	-1.72274	-1.88162	-1.09223	0.99	0.0117302	0.136379	0.35633
LOC781323	12899015	5.98029	0.102859	5.75576	0.102859	5.85561	0.102859	6.2373	0.102859	4.09228	0.0324297	-1.16839	-1.09027	1.195	1.07166	1.39623	1.30287	0.99	0.108379	0.0122155	0.459622
HIST1H2AG	12803578	11.0674	0.300275	11.601	0.300275	10.1423	0.300275	10.7851	0.300275	4.09173	0.0324421	1.44751	-1.89889	-1.21617	-2.74867	-1.76043	1.56136	0.99	0.0133475	0.858707	0.0737815
LOC100125776	12726317	6.43236	0.130637	6.57925	0.130637	6.41647	0.130637	6.98372	0.130637	4.09048	0.0324702	1.10718	-1.01107	1.46547	-1.11944	1.32361	1.48169	0.99	0.162735	0.133616	0.0181556
LOC782022	12825604	10.7475	0.113325	10.7995	0.113325	11.173	0.113325	10.649	0.113325	4.08829	0.0325197	1.03672	1.34299	-1.07066	1.29542	-1.10997	-1.43789	0.99	0.248469	0.0258781	0.0593927
XPNPEP3	12861712	8.72541	0.0951705	8.28173	0.0951705	8.63139	0.0951705	8.5946	0.0951705	4.08778	0.0325312	-1.36007	-1.06734	-1.09491	1.27425	1.24217	-1.02583	0.99	0.27265	0.0538111	0.0267015
DDX23	12861406	9.18819	0.10992	8.96207	0.10992	8.67287	0.10992	9.08113	0.10992	4.08736	0.0325407	-1.16968	-1.42931	-1.07703	-1.22196	1.08603	1.32708	0.99	0.0966302	0.0136867	0.423555
HPS5	12830251	10.1211	0.12533	10.1194	0.12533	9.58573	0.12533	9.99422	0.12533	4.08518	0.0325902	-1.00115	-1.44928	-1.09191	-1.44761	-1.09065	1.32729	0.99	0.021768	0.127723	0.130546
LOC100300220	12902500	6.04331	0.104959	6.16052	0.104959	5.89266	0.104959	5.66894	0.104959	4.08497	0.0325951	1.08463	-1.11007	-1.29627	-1.20402	-1.40597	-1.16773	0.99	0.00991005	0.130323	0.621102
LHX6	12707736	7.00069	0.0997096	7.49231	0.0997096	7.27696	0.0997096	7.27808	0.0997096	4.08396	0.0326179	1.40602	1.21107	1.212	-1.16098	-1.16008	1.00077	0.99	0.761023	0.0300567	0.0294476
MIR2470	12888858	8.73908	0.104678	8.65311	0.104678	8.44134	0.104678	8.95219	0.104678	4.08188	0.0326652	-1.0614	-1.22922	1.15918	-1.15811	1.23036	1.42489	0.99	0.995026	0.0146017	0.0651916
PDCD6	12786732	11.5566	0.120248	10.9793	0.120248	11.1849	0.120248	11.1531	0.120248	4.07865	0.0327388	-1.49203	-1.29385	-1.32276	1.15317	1.12797	-1.02234	0.99	0.426512	0.0426062	0.0262797
LOC100296552	12713292	14.3997	0.070569	14.2744	0.070569	14.4383	0.070569	14.1226	0.070569	4.07586	0.0328025	-1.09077	1.0271	-1.21178	1.12033	-1.11094	-1.24462	0.99	0.438118	0.202342	0.00877368
ELP3	12895966	9.69231	0.0849968	9.69511	0.0849968	9.34968	0.0849968	9.69107	0.0849968	4.07522	0.032817	1.00195	-1.26807	-1.00086	-1.27054	-1.00281	1.26698	0.99	0.0640635	0.0696571	0.0657312
OOEP	12899855	7.67112	0.082315	7.46692	0.082315	7.54373	0.082315	7.84707	0.082315	4.07472	0.0328285	-1.15204	-1.09231	1.12971	1.05468	1.30148	1.234	0.99	0.150633	0.00948696	0.55823
LOC100337285	12678437	6.24754	0.0736625	5.91377	0.0736625	6.1673	0.0736625	6.02362	0.0736625	4.06934	0.0329517	-1.2603	-1.05719	-1.1679	1.19213	1.07912	-1.10473	0.99	0.844025	0.221286	0.00707575
SPNS3	12763454	7.91199	0.081708	7.96305	0.081708	7.97981	0.081708	8.27614	0.081708	4.06821	0.0329779	1.03603	1.04813	1.28712	1.01168	1.24236	1.22801	0.99	0.03801	0.159241	0.0549629
IL5RA	12796963	6.24984	0.0584196	6.33967	0.0584196	6.05817	0.0584196	6.23593	0.0584196	4.0681	0.0329803	1.06425	-1.14208	-1.00969	-1.21546	-1.07456	1.13113	0.99	0.0264998	0.466214	0.0409105
LOC530353	12820283	8.18529	0.101001	8.35436	0.101001	7.90078	0.101001	8.30753	0.101001	4.06685	0.033009	1.12434	-1.21799	1.08843	-1.36943	-1.03299	1.32569	0.99	0.126887	0.262167	0.0146071
LOC782645	12730199	6.11902	0.0980523	5.86709	0.0980523	6.29165	0.0980523	6.27906	0.0980523	4.06514	0.0330484	-1.1908	1.12711	1.11731	1.34216	1.33049	-1.00877	0.99	0.0114642	0.245737	0.202275
GTF3A	12710899	10.7537	0.129105	10.708	0.129105	10.2141	0.129105	10.3789	0.129105	4.06453	0.0330626	-1.03215	-1.45349	-1.29661	-1.40822	-1.25623	1.12099	0.99	0.00563217	0.430986	0.652799
PPP3R2	12895490	6.74104	0.111656	7.21088	0.111656	6.73302	0.111656	6.83981	0.111656	4.0642	0.0330702	1.38496	-1.00558	1.07086	-1.39268	-1.29331	1.07683	0.99	0.115341	0.129958	0.0240013
NXPH2	12774550	6.55476	0.0725049	6.63764	0.0725049	6.89688	0.0725049	6.71863	0.0725049	4.06294	0.0330992	1.05913	1.26762	1.12029	1.19685	1.05774	-1.13151	0.99	0.0128937	0.0968991	0.52316
SPATA3	12779507	6.50481	0.103831	6.74656	0.103831	7.00128	0.103831	6.64715	0.103831	4.06094	0.0331455	1.18243	1.41076	1.1037	1.1931	-1.07133	-1.27821	0.99	0.0800321	0.0141033	0.598326
LOC100336992	12687839	6.16709	0.0884934	5.74173	0.0884934	5.95885	0.0884934	6.03682	0.0884934	4.0603	0.0331603	-1.34291	-1.15528	-1.0945	1.16241	1.22696	1.05553	0.99	0.632479	0.0147905	0.0732733
CDC25A	12795899	7.806	0.096714	8.0031	0.096714	7.65217	0.096714	8.08376	0.096714	4.05901	0.0331901	1.14639	-1.11252	1.21232	-1.27538	1.0575	1.34872	0.99	0.711848	0.248731	0.00695281
TXNL4B	12750962	10.5257	0.0811953	10.6227	0.0811953	10.2376	0.0811953	10.4537	0.0811953	4.05796	0.0332144	1.06953	-1.22099	-1.05115	-1.30588	-1.12424	1.16157	0.99	0.0156271	0.477389	0.0778842
RAB3IL1	12834851	6.51103	0.112431	6.64363	0.112431	6.54314	0.112431	7.0045	0.112431	4.05632	0.0332526	1.09626	1.02251	1.40782	-1.07213	1.2842	1.37683	0.99	0.106038	0.169415	0.0215177
TCF7L2	12820770	13.4862	0.158457	14.2505	0.158457	13.8799	0.158457	14.0057	0.158457	4.05602	0.0332594	1.69852	1.31374	1.43348	-1.29289	-1.18489	1.09115	0.99	0.646834	0.0669277	0.0157864
	12911883	6.7185	0.577783	8.99983	0.577783	9.1313	0.577783	7.57085	0.577783	4.05562	0.0332687	4.86127	5.32507	1.80545	1.09541	-2.69255	-2.94944	0.99	0.411227	0.00605856	0.544409
UBE2N	12868226	12.6093	0.0593482	12.5497	0.0593482	12.3419	0.0593482	12.4327	0.0593482	4.05531	0.0332759	-1.04223	-1.20368	-1.13028	-1.15491	-1.08448	1.06494	0.99	0.00710067	0.229014	0.797755
LOC100296565	12693029	10.6258	0.144951	10.4775	0.144951	9.95251	0.144951	10.436	0.144951	4.05483	0.0332872	-1.10824	-1.59465	-1.14055	-1.4389	-1.02915	1.39815	0.99	0.0297485	0.049953	0.27002
PRLHR	12821913	5.78231	0.0535485	5.92641	0.0535485	6.00133	0.0535485	6.01934	0.0535485	4.05362	0.0333153	1.10504	1.16394	1.17856	1.0533	1.06653	1.01256	0.99	0.0130159	0.2619	0.156005
SAFB	12887199	10.2773	0.177723	9.43713	0.177723	9.98537	0.177723	10.0637	0.177723	4.05206	0.0333517	-1.79019	-1.22423	-1.15957	1.4623	1.54384	1.05576	0.99	0.36502	0.0239299	0.0532759
LOC100336687	12811227	7.24264	0.147383	7.67819	0.147383	6.98797	0.147383	7.13904	0.147383	4.04814	0.0334431	1.35243	-1.19306	-1.07445	-1.61352	-1.45311	1.11039	0.99	0.0195599	0.353535	0.0698552
THG1L	12878036	10.6308	0.0935131	10.2566	0.0935131	10.2316	0.0935131	10.2828	0.0935131	4.04477	0.0335218	-1.2961	-1.3188	-1.27282	-1.01752	1.01829	1.03613	0.99	0.0692856	0.0421	0.109815
F3	12835715	8.2386	0.183962	7.971	0.183962	8.82923	0.183962	8.16423	0.183962	4.04361	0.0335492	-1.20381	1.5059	-1.05291	1.81282	1.14332	-1.58558	0.99	0.0545084	0.301318	0.0261873
NKAPL	12805757	5.73562	0.0651926	5.5926	0.0651926	5.48819	0.0651926	5.77154	0.0651926	4.04258	0.0335734	-1.10421	-1.18709	1.02521	-1.07506	1.13205	1.21702	0.99	0.608938	0.00670248	0.302943
RCAN2	12915561	6.43583	0.0677748	6.48283	0.0677748	6.74132	0.0677748	6.50735	0.0677748	4.04235	0.0335786	1.03312	1.23585	1.05083	1.19623	1.01714	-1.17607	0.99	0.0314655	0.0603721	0.192957
CCR9	12799593	7.35795	0.08684	7.66887	0.08684	7.4345	0.08684	7.71504	0.08684	4.04223	0.0335814	1.24049	1.05449	1.28084	-1.17639	1.03252	1.21465	0.99	0.493324	0.864071	0.00521723
LRFN5	12790928	6.04637	0.043392	6.09377	0.043392	6.21017	0.043392	6.224	0.043392	4.04215	0.0335834	1.0334	1.12023	1.13102	1.08403	1.09447	1.00963	0.99	0.0053869	0.705722	0.493992
TMPRSS3	12686061	5.81227	0.0851015	5.70783	0.0851015	6.05103	0.0851015	6.04275	0.0851015	4.03953	0.0336451	-1.07508	1.17998	1.17323	1.26857	1.26131	-1.00575	0.99	0.00556427	0.582472	0.520343
LOC529535	12720181	6.26506	0.0994493	6.23062	0.0994493	6.11509	0.0994493	6.58202	0.0994493	4.03587	0.0337312	-1.02416	-1.10954	1.24571	-1.08337	1.2758	1.38216	0.99	0.331164	0.0268756	0.0503944
MCTP1	12886630	9.01318	0.138542	9.21362	0.138542	9.4791	0.138542	8.83046	0.138542	4.03204	0.0338219	1.14905	1.3812	-1.13503	1.20203	-1.3042	-1.5677	0.99	0.770312	0.00981894	0.131722
	12912041	7.58028	0.37522	8.37312	0.37522	6.71422	0.37522	8.21239	0.37522	4.02524	0.0339833	1.73248	-1.82269	1.54982	-3.15777	-1.11786	2.82485	0.99	0.196301	0.365806	0.0100307
gzmA	12787079	6.62109	0.0658481	6.39349	0.0658481	6.43401	0.0658481	6.65751	0.0658481	4.02489	0.0339917	-1.17088	-1.13846	1.02556	1.02848	1.20081	1.16756	0.99	0.56994	0.0050294	0.975706
	12915630	5.12077	0.0398933	5.26425	0.0398933	5.12647	0.0398933	5.08105	0.0398933	4.02181	0.0340651	1.10457	1.00396	-1.02792	-1.10021	-1.1354	-1.03198	0.99	0.0460414	0.0355608	0.242606
PRSS12	12870876	5.76566	0.076668	5.96824	0.076668	5.94667	0.076668	6.14149	0.076668	4.01916	0.0341284	1.15076	1.13368	1.29759	-1.01506	1.1276	1.14458	0.99	0.0394489	0.960445	0.0235828
CACYBP	12737596	13.1709	0.302088	13.0945	0.302088	14.2493	0.302088	12.9095	0.302088	4.01829	0.0341493	-1.0544	2.1118	-1.1986	2.22669	-1.13676	-2.53121	0.99	0.164917	0.05846	0.0371083
RAB8A	12882589	15.2011	0.230634	15.5411	0.230634	14.4613	0.230634	14.8643	0.230634	4.01461	0.0342374	1.26569	-1.66994	-1.26302	-2.11363	-1.59859	1.32219	0.99	0.00969704	0.893628	0.133274
LOC100296471	12713290	16.2061	0.0494106	16.154	0.0494106	16.313	0.0494106	16.0772	0.0494106	4.01332	0.0342684	-1.03674	1.07697	-1.09344	1.11653	-1.05469	-1.1776	0.99	0.76552	0.0875739	0.0130001
LOC100300643	12713395	16.2061	0.0494106	16.154	0.0494106	16.313	0.0494106	16.0772	0.0494106	4.01332	0.0342684	-1.03674	1.07697	-1.09344	1.11653	-1.05469	-1.1776	0.99	0.76552	0.0875739	0.0130001
LOC100337471	12713529	16.2061	0.0494106	16.154	0.0494106	16.313	0.0494106	16.0772	0.0494106	4.01332	0.0342684	-1.03674	1.07697	-1.09344	1.11653	-1.05469	-1.1776	0.99	0.76552	0.0875739	0.0130001
MIR296	12911113	10.3852	0.115773	10.2292	0.115773	10.761	0.115773	10.5833	0.115773	4.00722	0.0344155	-1.11418	1.29756	1.14717	1.44571	1.27815	-1.1311	0.99	0.00834233	0.926737	0.175107
LOC789761	12915373	7.6636	0.094439	7.20364	0.094439	7.47822	0.094439	7.45375	0.094439	4.00398	0.0344939	-1.37551	-1.13711	-1.15657	1.20965	1.1893	-1.01711	0.99	0.737708	0.0397852	0.0247815
MIR2393	12818810	5.36019	0.465817	7.48309	0.465817	5.78554	0.465817	5.87723	0.465817	4.0033	0.0345103	4.35569	1.34289	1.43101	-3.24352	-3.04378	1.06562	0.99	0.22914	0.0498702	0.0349461
LOC100295089	12698041	10.1727	0.117563	9.82436	0.117563	10.3519	0.117563	10.2875	0.117563	4.00063	0.034575	-1.27311	1.13222	1.08279	1.44144	1.37851	-1.04565	0.99	0.018213	0.250429	0.104641
SCUBE1	12866638	7.81388	0.128798	7.49255	0.128798	7.47919	0.128798	8.00699	0.128798	3.99851	0.0346266	-1.24948	-1.26111	1.14322	-1.00931	1.42844	1.44173	0.99	0.498624	0.0063833	0.438399
CYHR1	12721697	7.87285	0.079781	7.98269	0.079781	8.20497	0.079781	8.17959	0.079781	3.99691	0.0346656	1.07911	1.25886	1.23691	1.16658	1.14623	-1.01775	0.99	0.00616153	0.413331	0.606256
	12914313	8.57504	0.118297	8.65606	0.118297	9.10388	0.118297	8.69256	0.118297	3.99643	0.0346772	1.05776	1.44277	1.08487	1.36398	1.02563	-1.3299	0.99	0.0341633	0.0595236	0.187983
LOC539015	12861688	8.89868	0.144179	8.59992	0.144179	9.29311	0.144179	9.03003	0.144179	3.99603	0.034687	-1.23009	1.31443	1.09532	1.61686	1.34734	-1.20004	0.99	0.0143684	0.903573	0.0751352
LOC783264	12717377	13.5084	0.0838364	13.4286	0.0838364	13.7157	0.0838364	13.3193	0.0838364	3.99112	0.0348069	-1.05687	1.15449	-1.14011	1.22014	-1.07876	-1.31624	0.99	0.570214	0.0833868	0.0148911
SKP1	12887757	14.4299	0.151184	14.0183	0.151184	14.748	0.151184	14.3101	0.151184	3.98945	0.0348478	-1.33016	1.24664	-1.08666	1.65824	1.22408	-1.35468	0.99	0.0666845	0.931993	0.0157595
LOC512180	12837933	14.4751	0.0918995	14.6302	0.0918995	14.1896	0.0918995	14.3937	0.0918995	3.98682	0.0349123	1.1135	-1.2189	-1.05804	-1.35724	-1.17813	1.15203	0.99	0.0148838	0.794	0.0743141
RAD52	12865651	9.53655	0.0910909	9.18849	0.0910909	9.39737	0.0910909	9.59881	0.0910909	3.98677	0.0349137	-1.27285	-1.10128	1.0441	1.15579	1.32898	1.14985	0.99	0.162475	0.0107381	0.43659
TADA1	12838899	11.2462	0.116247	10.6969	0.116247	11.0734	0.116247	11.076	0.116247	3.98354	0.034993	-1.46335	-1.12722	-1.12523	1.29819	1.30049	1.00177	0.99	0.39239	0.035176	0.0366078
TNFRSF19	12713054	8.04355	0.144788	7.8392	0.144788	7.35475	0.144788	7.75728	0.144788	3.98139	0.035046	-1.15217	-1.61194	-1.21948	-1.39904	-1.05842	1.32182	0.99	0.0207337	0.0579791	0.50676
	12857265	14.97	0.256461	14.0008	0.256461	15.1712	0.256461	14.7666	0.256461	3.98026	0.035074	-1.95782	1.14965	-1.15141	2.25082	1.70037	-1.32372	0.99	0.0838163	0.292554	0.0200933
AFF4	12887551	14.8174	0.188543	14.807	0.188543	15.5493	0.188543	14.7702	0.188543	3.97876	0.035111	-1.00727	1.66077	-1.03328	1.67284	-1.02582	-1.71603	0.99	0.0901135	0.0641796	0.0581865
CSRNP1	12799096	8.84119	0.0990233	8.65725	0.0990233	8.98714	0.0990233	8.54016	0.0990233	3.97809	0.0351275	-1.13598	1.10646	-1.23203	1.25692	-1.08455	-1.36319	0.99	0.886598	0.208821	0.00783722
ESM1	12786321	7.70832	0.178226	8.06197	0.178226	8.57123	0.178226	8.17336	0.178226	3.97715	0.0351509	1.27779	1.8187	1.38036	1.42332	1.08027	-1.31756	0.99	0.0181544	0.0567009	0.903325
BIN3	12893075	9.26256	0.100577	9.11281	0.100577	8.78292	0.100577	9.04328	0.100577	3.97074	0.0353098	-1.10938	-1.39439	-1.16415	-1.25692	-1.04937	1.19778	0.99	0.0182643	0.0641286	0.592492
CACNA1G	12767490	6.76745	0.100025	6.52958	0.100025	6.56673	0.100025	6.96068	0.100025	3.97002	0.0353277	-1.17925	-1.14928	1.14332	1.02608	1.34826	1.31399	0.99	0.271918	0.00824622	0.450357
ZNF418	12913195	9.22636	0.060769	9.092	0.060769	8.95503	0.060769	9.18884	0.060769	3.96912	0.0353502	-1.09761	-1.20692	-1.02635	-1.09959	1.06943	1.17593	0.99	0.176626	0.0104806	0.42919
CLK1	12784117	13.2466	0.223783	13.2119	0.223783	14.1465	0.223783	13.3215	0.223783	3.96507	0.0354514	-1.02438	1.8659	1.05325	1.91139	1.07893	-1.77157	0.99	0.0435647	0.102849	0.0788032
ABHD13	12709658	11.7187	0.0711011	11.5042	0.0711011	11.8235	0.0711011	11.5846	0.0711011	3.96416	0.0354742	-1.16028	1.07536	-1.09743	1.24773	1.05727	-1.18013	0.99	0.21729	0.866216	0.00779583
NAA16	12710371	11.0168	0.141151	11.4534	0.141151	10.7799	0.141151	11.0158	0.141151	3.96277	0.035509	1.35341	-1.17844	-1.00069	-1.59491	-1.35435	1.17762	0.99	0.0341851	0.490656	0.0346292
ABI1	12716791	13.1868	0.10862	13.4512	0.10862	13.0763	0.10862	12.9416	0.10862	3.96052	0.0355653	1.20114	-1.07966	-1.18528	-1.29682	-1.42368	-1.09783	0.99	0.0144898	0.091102	0.561429
DLK2	12806536	8.73943	0.102778	8.58597	0.102778	8.93652	0.102778	9.04546	0.102778	3.95969	0.0355861	-1.11223	1.14639	1.2363	1.27505	1.37505	1.07843	0.99	0.00771554	0.225933	0.832171
DDX3X	12907898	15.9805	0.142568	15.6977	0.142568	16.3652	0.142568	15.8648	0.142568	3.95761	0.0356385	-1.21653	1.30563	-1.08346	1.58835	1.12282	-1.41461	0.99	0.0768458	0.460067	0.0177111
KRT13	12768497	8.5281	0.11185	9.02461	0.11185	8.78442	0.11185	8.59577	0.11185	3.95676	0.0356599	1.4108	1.19443	1.04802	-1.18115	-1.34616	-1.1397	0.99	0.455499	0.00984537	0.193892
	12879132	11.9565	0.310605	11.6497	0.310605	10.5449	0.310605	11.1468	0.310605	3.95472	0.0357112	-1.23698	-2.66041	-1.75288	-2.15073	-1.41706	1.51774	0.99	0.00950315	0.169197	0.643288
AZI2	12800588	12.4322	0.119162	12.572	0.119162	12.2112	0.119162	12.0361	0.119162	3.95135	0.0357962	1.10173	-1.16558	-1.31595	-1.28416	-1.44982	-1.129	0.99	0.00797987	0.211141	0.884791
SHC2	12886608	8.02267	0.0777697	8.22199	0.0777697	8.37832	0.0777697	8.10368	0.0777697	3.94946	0.0358441	1.14816	1.27956	1.05776	1.11445	-1.08546	-1.20969	0.99	0.152947	0.0101373	0.636904
HOXD4	12781489	5.68486	0.0444485	5.68313	0.0444485	5.87095	0.0444485	5.75779	0.0444485	3.94852	0.0358679	-1.0012	1.13768	1.05185	1.13905	1.05311	-1.0816	0.99	0.0125293	0.233896	0.220506
TSEN2	12799116	8.22139	0.102152	8.166	0.102152	7.97462	0.102152	8.46722	0.102152	3.94847	0.0358693	-1.03914	-1.18655	1.18578	-1.14186	1.23219	1.40699	0.99	0.794367	0.0199533	0.0535858
PCP2	12887917	8.45675	0.123535	8.96226	0.123535	8.42789	0.123535	8.62759	0.123535	3.94788	0.0358841	1.41962	-1.02021	1.12571	-1.44831	-1.26108	1.14846	0.99	0.166926	0.239497	0.0145074
LOC100336791	12829262	4.12892	0.0708333	4.43987	0.0708333	4.21894	0.0708333	4.36714	0.0708333	3.94629	0.0359246	1.24052	1.06438	1.17953	-1.16548	-1.0517	1.10819	0.99	0.904895	0.273048	0.00707292
LOC100336434	12794286	7.41456	0.068564	7.66352	0.068564	7.63091	0.068564	7.41048	0.068564	3.94412	0.0359796	1.18836	1.1618	-1.00283	-1.02286	-1.19172	-1.16508	0.99	0.793608	0.00504977	0.838621
IP6K2	12794969	10.0109	0.0737243	10.1173	0.0737243	10.0829	0.0737243	9.79149	0.0737243	3.93867	0.0361186	1.07655	1.05122	-1.16422	-1.0241	-1.25335	-1.22386	0.99	0.110955	0.0193716	0.233448
COQ10B	12776437	10.7491	0.309186	10.7932	0.309186	12.0497	0.309186	10.9712	0.309186	3.93736	0.0361521	1.03106	2.4634	1.16645	2.3892	1.13131	-2.11188	0.99	0.0340606	0.0945021	0.120218
MBL-A	12827866	6.13999	0.101024	6.07547	0.101024	6.51621	0.101024	6.34154	0.101024	3.9347	0.0362201	-1.04574	1.29793	1.14994	1.3573	1.20253	-1.1287	0.99	0.00793708	0.595666	0.259405
ZNF32	12826182	8.05951	0.0692926	8.00734	0.0692926	7.75246	0.0692926	7.88088	0.0692926	3.92848	0.0363799	-1.03682	-1.23717	-1.13181	-1.19323	-1.09161	1.09309	0.99	0.0087233	0.216997	0.592286
PDP1	12724175	9.39474	0.126384	9.06467	0.126384	9.59221	0.126384	9.10252	0.126384	3.92776	0.0363985	-1.25707	1.14669	-1.22452	1.44147	1.02658	-1.40414	0.99	0.37021	0.539565	0.00704587
LOC527195	12681130	6.84931	0.0749528	6.59444	0.0749528	6.86241	0.0749528	6.93402	0.0749528	3.92436	0.0364863	-1.19323	1.00913	1.06048	1.20412	1.26539	1.05089	0.99	0.036531	0.050083	0.24498
DLGAP4	12715483	13.2462	0.134905	13.3993	0.134905	12.785	0.134905	13.0293	0.134905	3.92398	0.0364962	1.11196	-1.37664	-1.16219	-1.53076	-1.29231	1.18452	0.99	0.00953248	0.741192	0.166522
IFNAA	12915563	7.9903	0.121126	7.91014	0.121126	8.10406	0.121126	8.45419	0.121126	3.92349	0.0365089	-1.05714	1.08204	1.37926	1.14387	1.45807	1.27468	0.99	0.0187664	0.10103	0.286923
APBB3	12885943	7.76266	0.0707111	7.60777	0.0707111	7.94648	0.0707111	7.81311	0.0707111	3.91666	0.036686	-1.11334	1.13588	1.03559	1.26463	1.15296	-1.09685	0.99	0.0175456	0.881542	0.0641816
XK	12909790	8.00316	0.0901939	7.95204	0.0901939	8.15221	0.0901939	8.34973	0.0901939	3.91507	0.0367272	-1.03607	1.10884	1.27153	1.14884	1.3174	1.14672	0.99	0.010448	0.193243	0.432857
	12915620	6.68288	0.0832367	6.87933	0.0832367	6.51914	0.0832367	6.54629	0.0832367	3.91442	0.0367444	1.14588	-1.12019	-1.0993	-1.28359	-1.25966	1.019	0.99	0.0113986	0.329236	0.204058
LOC618391	12759580	6.93109	0.0770324	6.93597	0.0770324	7.03834	0.0770324	7.25679	0.0770324	3.91437	0.0367454	1.00339	1.07718	1.25327	1.07354	1.24904	1.16348	0.99	0.0166951	0.190898	0.172815
BRSK2	12834516	7.4277	0.0726484	7.64441	0.0726484	7.49066	0.0726484	7.29849	0.0726484	3.91345	0.0367694	1.16208	1.04461	-1.09369	-1.11246	-1.27096	-1.14248	0.99	0.0752643	0.015629	0.868692
GSK3A	12753107	8.55734	0.130225	8.225	0.130225	7.93043	0.130225	8.18191	0.130225	3.91291	0.0367836	-1.25905	-1.54426	-1.29723	-1.22652	-1.03032	1.19043	0.99	0.0244331	0.0446708	0.761529
SLC43A1	12733392	8.38615	0.0901196	8.11645	0.0901196	8.35778	0.0901196	8.54845	0.0901196	3.91055	0.0368452	-1.20556	-1.01986	1.11907	1.18209	1.34911	1.1413	0.99	0.0448411	0.025267	0.668824
LOC100298572	12693121	8.92821	0.200305	8.3713	0.200305	9.31137	0.200305	9.04776	0.200305	3.90902	0.0368852	-1.47111	1.3042	1.0864	1.91861	1.59822	-1.20047	0.99	0.0213746	0.47814	0.0630779
LOC617011	12831908	8.99973	0.133081	8.5624	0.133081	9.0113	0.133081	9.17722	0.133081	3.90512	0.0369876	-1.35409	1.00805	1.13092	1.365	1.53137	1.12189	0.99	0.0364839	0.0427085	0.327998
LOC100301340	12784962	6.60069	0.0674291	6.8781	0.0674291	6.59645	0.0674291	6.65261	0.0674291	3.90392	0.0370191	1.21202	-1.00295	1.03665	-1.21559	-1.16917	1.0397	0.99	0.11421	0.126824	0.0293018
MYO15A	12773309	6.42343	0.0470158	6.59121	0.0470158	6.58105	0.0470158	6.4274	0.0470158	3.90387	0.0370203	1.12332	1.11544	1.00275	-1.00707	-1.12024	-1.11238	0.99	0.948536	0.00509462	0.883111
SLC25A24	12840042	10.3019	0.163518	9.63825	0.163518	10.185	0.163518	9.75463	0.163518	3.9	0.0371224	-1.58412	-1.08444	-1.46135	1.46077	1.08401	-1.34756	0.99	0.998638	0.489209	0.00583073
LOC100336369	12902581	8.73953	0.167284	8.7804	0.167284	8.39091	0.167284	9.1976	0.167284	3.89964	0.0371319	1.02873	-1.27334	1.3737	-1.30993	1.33533	1.74919	0.99	0.841018	0.041008	0.0262606
SLC4A7	12798802	13.7646	0.203669	13.382	0.203669	14.0913	0.203669	13.1884	0.203669	3.89919	0.0371436	-1.30367	1.25416	-1.49089	1.63501	-1.14361	-1.86982	0.99	0.749436	0.225629	0.00828525
MCAT	12864989	8.80955	0.132193	8.24993	0.132193	8.57801	0.132193	8.79414	0.132193	3.89855	0.0371606	-1.47388	-1.17409	-1.01074	1.25534	1.45821	1.16161	0.99	0.259878	0.0125073	0.21828
LOC507428	12731429	6.81279	0.130545	6.48813	0.130545	6.20948	0.130545	6.65357	0.130545	3.89703	0.0372007	-1.25237	-1.51919	-1.11668	-1.21306	1.12151	1.36045	0.99	0.119364	0.012272	0.655534
LOC782554	12803873	7.23612	0.204314	6.49937	0.204314	7.34344	0.204314	7.32244	0.204314	3.89701	0.0372011	-1.66642	1.07722	1.06166	1.79511	1.76917	-1.01466	0.99	0.0419145	0.105332	0.0884119
EIF2B2	12689270	9.15498	0.0965905	8.84631	0.0965905	8.92083	0.0965905	8.69794	0.0965905	3.89633	0.0372191	-1.23856	-1.17621	-1.37272	1.05301	-1.10832	-1.16707	0.99	0.0710945	0.664943	0.017551
NR5A1	12703959	8.64793	0.0959989	8.56456	0.0959989	8.68487	0.0959989	8.99772	0.0959989	3.89405	0.0372796	-1.05949	1.02593	1.27437	1.08697	1.35019	1.24216	0.99	0.0306807	0.0613714	0.255087
RAB23	12803704	10.7928	0.124055	10.76	0.124055	10.5064	0.124055	11.1037	0.124055	3.89259	0.0373184	-1.02301	-1.21955	1.24048	-1.19212	1.26903	1.51283	0.99	0.821017	0.0259619	0.0420637
LOC100336731	12902680	7.28562	0.159353	7.1954	0.159353	7.32538	0.159353	7.88793	0.159353	3.89026	0.0373801	-1.06454	1.02794	1.51814	1.09428	1.61612	1.47688	0.99	0.0403676	0.0630711	0.164114
	12788552	16.5713	0.137086	16.6835	0.137086	16.2356	0.137086	16.1128	0.137086	3.88893	0.0374155	1.08082	-1.26206	-1.37418	-1.36405	-1.48524	-1.08885	0.99	0.00626814	0.408314	0.969582
LOC784354	12788551	16.5713	0.137086	16.6835	0.137086	16.2356	0.137086	16.1128	0.137086	3.88893	0.0374155	1.08082	-1.26206	-1.37418	-1.36405	-1.48524	-1.08885	0.99	0.00626814	0.408314	0.969582
LOC614468	12887704	8.1907	0.114458	8.23451	0.114458	8.41095	0.114458	8.68802	0.114458	3.88865	0.0374231	1.03083	1.16494	1.41159	1.1301	1.36937	1.21173	0.99	0.0122969	0.32833	0.186333
TAS2R38	12856203	7.03144	0.103841	6.77825	0.103841	7.08768	0.103841	7.27438	0.103841	3.8877	0.0374483	-1.19184	1.03975	1.1834	1.23922	1.41043	1.13816	0.99	0.0208024	0.0557192	0.754348
ENDOD1	12733011	8.44652	0.0965997	8.16769	0.0965997	7.98557	0.0965997	8.23507	0.0965997	3.88368	0.0375555	-1.21321	-1.37645	-1.15786	-1.13454	1.04781	1.18879	0.99	0.0643181	0.0181108	0.881808
LHX9	12735634	6.69168	0.0995852	6.53209	0.0995852	6.22615	0.0995852	6.41452	0.0995852	3.88141	0.0376162	-1.11698	-1.38083	-1.21181	-1.23622	-1.0849	1.13947	0.99	0.0126593	0.106143	0.887543
BCL2L15	12837523	8.4597	0.197536	8.67208	0.197536	7.76958	0.197536	8.19124	0.197536	3.88032	0.0376454	1.1586	-1.61341	-1.20452	-1.8693	-1.39556	1.33947	0.99	0.0118345	0.605969	0.1345
CREG2	12708314	7.20423	0.0634029	7.37395	0.0634029	7.1133	0.0634029	7.35589	0.0634029	3.8803	0.037646	1.12484	-1.06506	1.11084	-1.19802	-1.0126	1.18311	0.99	0.406896	0.576151	0.00693779
LOC618690	12888056	9.1373	0.1734	8.32987	0.1734	8.56666	0.1734	8.59502	0.1734	3.87694	0.0377361	-1.7501	-1.48518	-1.45627	1.17837	1.20176	1.01985	0.99	0.395681	0.0329112	0.0442777
CX3CR1	12797691	10.2454	0.121143	10.5662	0.121143	9.98458	0.121143	10.2309	0.121143	3.87556	0.0377732	1.24902	-1.19816	-1.01007	-1.49652	-1.2616	1.18621	0.99	0.0300285	0.763942	0.0373246
LOC100336293	12915193	6.15387	0.0809512	6.05973	0.0809512	5.78101	0.0809512	6.0344	0.0809512	3.87467	0.0377973	-1.06743	-1.29492	-1.08634	-1.21312	-1.01771	1.192	0.99	0.0300691	0.0529695	0.344721
MIR382	12788866	8.36592	0.150791	8.10052	0.150791	8.75772	0.150791	8.65484	0.150791	3.87452	0.0378012	-1.20197	1.31203	1.22173	1.57702	1.46847	-1.07392	0.99	0.0085766	0.599828	0.245476
FYN	12897625	13.4045	0.114571	12.8628	0.114571	13.0983	0.114571	13.041	0.114571	3.87111	0.0378931	-1.45566	-1.23647	-1.28652	1.17727	1.13147	-1.04048	0.99	0.586631	0.0561225	0.0226434
LOC100296328	12823383	7.4913	0.0717609	7.61045	0.0717609	7.65195	0.0717609	7.8319	0.0717609	3.87017	0.0379186	1.08609	1.11779	1.26628	1.02918	1.16591	1.13285	0.99	0.0207027	0.679281	0.0592013
RNF6	12709957	9.02793	0.111236	9.33275	0.111236	8.80277	0.111236	9.00087	0.111236	3.87003	0.0379225	1.23527	-1.16891	-1.01893	-1.44392	-1.25865	1.14719	0.99	0.0277164	0.640072	0.0431616
AGBL5	12707304	7.69416	0.113983	7.75767	0.113983	7.72971	0.113983	8.17254	0.113983	3.86863	0.0379603	1.04501	1.02494	1.39318	-1.01958	1.33317	1.35927	0.99	0.0716321	0.121998	0.0463423
LOC100336609	12678402	7.02283	0.127133	6.57413	0.127133	7.11112	0.127133	6.73288	0.127133	3.86599	0.0380318	-1.36481	1.0631	-1.2226	1.45094	1.11632	-1.29976	0.99	0.35046	0.786403	0.00692715
ERAP2	12878948	13.8612	0.17875	14.2976	0.17875	13.4369	0.17875	13.8526	0.17875	3.86548	0.0380456	1.35322	-1.3419	-1.006	-1.81589	-1.36134	1.3339	0.99	0.0316397	0.954671	0.0345512
KCNA10	12840524	7.80471	0.107895	7.35912	0.107895	7.44955	0.107895	7.71597	0.107895	3.85884	0.0382262	-1.36187	-1.27913	-1.06344	1.06469	1.28063	1.20282	0.99	0.993853	0.006346	0.422577
UNC13A	12880093	6.85119	0.0707468	7.05031	0.0707468	6.90481	0.0707468	6.71429	0.0707468	3.85687	0.0382799	1.148	1.03786	-1.09954	-1.10612	-1.26227	-1.14117	0.99	0.0691479	0.0174799	0.952535
MIA	12749277	8.21264	0.128999	7.86764	0.128999	8.32121	0.128999	8.46117	0.128999	3.85683	0.0382811	-1.27015	1.07816	1.18799	1.36942	1.50893	1.10187	0.99	0.0185624	0.0846405	0.442203
LOC786867	12901587	6.83288	0.0707124	6.93203	0.0707124	6.90767	0.0707124	7.15543	0.0707124	3.85579	0.0383094	1.07114	1.05321	1.25055	-1.01702	1.16749	1.18736	0.99	0.0566765	0.314041	0.0304267
LOC781264	12733789	6.65122	0.140747	7.14003	0.140747	7.18505	0.140747	7.25993	0.140747	3.85518	0.0383263	1.40328	1.44777	1.52489	1.0317	1.08666	1.05327	0.99	0.0386026	0.167161	0.0683568
PREP	12896699	11.8986	0.115672	11.9372	0.115672	11.5066	0.115672	11.5466	0.115672	3.85374	0.0383655	1.02712	-1.31223	-1.27637	-1.34782	-1.31098	1.0281	0.99	0.00543621	0.995355	0.739994
MYB	12896715	9.95506	0.192861	9.89509	0.192861	10.6275	0.192861	9.79564	0.192861	3.85287	0.0383894	-1.04244	1.59382	-1.11684	1.66147	-1.07136	-1.78004	0.99	0.163169	0.0685002	0.0393175
LMAN1	12809588	12.9304	0.143154	13.0642	0.143154	12.5873	0.143154	13.2536	0.143154	3.85222	0.0384073	1.0972	-1.26844	1.25115	-1.39173	1.14031	1.587	0.99	0.60137	0.0875937	0.016205
MGC139448	12848262	5.30686	0.066105	5.23961	0.066105	5.49685	0.066105	5.48868	0.066105	3.85126	0.0384337	-1.04772	1.14076	1.13432	1.19519	1.18844	-1.00568	0.99	0.00609947	0.662944	0.578906
SEMA4A	12844032	10.7766	0.165379	11.506	0.165379	11.3753	0.165379	11.0862	0.165379	3.84875	0.0385027	1.65795	1.51435	1.23941	-1.09482	-1.3377	-1.22184	0.99	0.598388	0.00955324	0.207818
LOC786338	12906200	9.31741	0.155373	9.01004	0.155373	9.29413	0.155373	9.74888	0.155373	3.84749	0.0385371	-1.23745	-1.01626	1.34861	1.21764	1.66884	1.37055	0.99	0.0399989	0.0304515	0.64381
LOC781576	12847923	6.38419	0.0907691	6.70392	0.0907691	6.37265	0.0907691	6.667	0.0907691	3.84442	0.038622	1.2481	-1.00804	1.21656	-1.25813	-1.02592	1.22633	0.99	0.793995	0.891144	0.0054413
PPY	12767004	8.07293	0.0698995	8.0069	0.0698995	8.07526	0.0698995	8.31837	0.0698995	3.84438	0.0386231	-1.04684	1.00161	1.18545	1.04853	1.24098	1.18354	0.99	0.0444219	0.0471641	0.229311
HSP90AA1	12791662	15.0203	0.223619	14.8198	0.223619	15.7563	0.223619	14.8518	0.223619	3.84387	0.0386372	-1.14912	1.66555	-1.12391	1.91391	1.02243	-1.87193	0.99	0.111615	0.141446	0.0294487
FBXO9	12801726	13.3758	0.104827	13.194	0.104827	12.8863	0.104827	13.0769	0.104827	3.84254	0.0386738	-1.13434	-1.40396	-1.23021	-1.23769	-1.08451	1.14124	0.99	0.0134985	0.100989	0.967396
LOC786342	12713123	8.16368	0.0645392	8.35115	0.0645392	8.1484	0.0645392	8.04781	0.0645392	3.84223	0.0386823	1.13877	-1.01065	-1.08363	-1.15089	-1.234	-1.07221	0.99	0.0295789	0.0454711	0.513627
RET	12826315	7.64879	0.125964	7.8506	0.125964	7.50914	0.125964	7.26371	0.125964	3.83283	0.0389433	1.15014	-1.10164	-1.30593	-1.26703	-1.502	-1.18545	0.99	0.0137305	0.101199	0.865401
LOC786840	12882306	8.33669	0.168493	8.12326	0.168493	8.51627	0.168493	8.90146	0.168493	3.83116	0.03899	-1.15945	1.13255	1.47915	1.31313	1.71499	1.30603	0.99	0.0148359	0.101004	0.619528
AMIGO1	12839104	7.30535	0.0743154	7.47097	0.0743154	7.23136	0.0743154	7.54681	0.0743154	3.83081	0.0389996	1.12165	-1.05262	1.18219	-1.18067	1.05397	1.2444	0.99	0.990274	0.333317	0.00713044
TRIM6	12733609	9.8724	0.248081	10.6333	0.248081	9.47756	0.248081	9.84352	0.248081	3.83057	0.0390064	1.69452	-1.3148	-1.02021	-2.22795	-1.72877	1.28875	0.99	0.0342905	0.441537	0.0423518
COMMD9	12731651	9.46355	0.121335	9.85964	0.121335	9.37531	0.121335	9.34693	0.121335	3.82938	0.0390397	1.31594	-1.06307	-1.08419	-1.39893	-1.42673	-1.01987	0.99	0.0291507	0.105766	0.155595
ELFN1	12818494	8.46243	0.112296	8.85997	0.112296	8.64008	0.112296	8.94947	0.112296	3.82557	0.0391462	1.31726	1.13104	1.40157	-1.16464	1.06401	1.23919	0.99	0.257227	0.701602	0.00841166
	12726858	17.6086	0.122149	17.0413	0.122149	17.3786	0.122149	17.4481	0.122149	3.82406	0.0391886	-1.48177	-1.17281	-1.11764	1.26343	1.32581	1.04937	0.99	0.482873	0.022934	0.0642534
MGC143209	12787924	11.0636	0.199029	10.384	0.199029	10.1795	0.199029	10.3562	0.199029	3.82405	0.0391888	-1.60172	-1.84565	-1.6328	-1.15229	-1.01941	1.13036	0.99	0.040874	0.0525071	0.230497
GINS3	12753322	7.22777	0.0850478	6.88803	0.0850478	6.92731	0.0850478	7.1505	0.0850478	3.82402	0.0391899	-1.26553	-1.23154	-1.05502	1.0276	1.19953	1.16731	0.99	0.82699	0.00623044	0.506228
EBD	12824802	7.66812	0.125409	7.75741	0.125409	7.91575	0.125409	8.22606	0.125409	3.82344	0.039206	1.06385	1.18726	1.47217	1.11601	1.38382	1.23997	0.99	0.0144655	0.395534	0.13711
WHAMM	12789714	10.2364	0.0709849	10.4265	0.0709849	10.2241	0.0709849	10.0891	0.0709849	3.82089	0.0392777	1.14086	-1.00853	-1.10749	-1.15059	-1.26349	-1.09813	0.99	0.0298756	0.0409021	0.70482
LOC100336176	12915035	8.10467	0.0984436	7.80847	0.0984436	8.23151	0.0984436	8.19794	0.0984436	3.82041	0.0392912	-1.2279	1.0919	1.06679	1.34075	1.30991	-1.02354	0.99	0.0222886	0.206997	0.119796
TPPP3	12759184	6.97682	0.108362	6.56241	0.108362	6.84171	0.108362	7.03902	0.108362	3.81765	0.0393692	-1.33275	-1.09817	1.04405	1.2136	1.39146	1.14655	0.99	0.141076	0.0153878	0.336246
ZFP36L2	12825103	8.06951	0.115749	7.56045	0.115749	7.63511	0.115749	7.80993	0.115749	3.81657	0.0393995	-1.42312	-1.35135	-1.19713	1.05311	1.18878	1.12883	0.99	0.439914	0.0120506	0.174397
LAP	12823588	7.36723	0.234184	7.84608	0.234184	6.98182	0.234184	6.81791	0.234184	3.81479	0.0394498	1.39364	-1.30623	-1.46339	-1.82041	-2.03944	-1.12032	0.99	0.0107008	0.19506	0.514053
LOC100300428	12848587	9.49807	0.144602	9.10634	0.144602	9.69115	0.144602	9.14498	0.144602	3.81476	0.0394508	-1.31197	1.1432	-1.2773	1.49983	1.02714	-1.4602	0.99	0.438599	0.603088	0.007047
LOC789121	12856216	8.79822	0.0808649	8.6839	0.0808649	8.98888	0.0808649	8.6328	0.0808649	3.81304	0.0394995	-1.08247	1.14129	-1.12149	1.23541	-1.03605	-1.27995	0.99	0.405089	0.160786	0.0131151
SYPL2	12844784	7.44684	0.201493	7.52836	0.201493	7.86862	0.201493	8.3114	0.201493	3.81157	0.039541	1.05813	1.33958	1.82078	1.26598	1.72075	1.35922	0.99	0.0112802	0.387643	0.217676
LOC100296076	12902159	8.20361	0.175251	8.64436	0.175251	7.86458	0.175251	7.99201	0.175251	3.80903	0.0396133	1.35731	-1.2649	-1.15797	-1.71687	-1.57173	1.09234	0.99	0.0152193	0.388924	0.130972
TNFSF8	12895218	11.3861	0.225029	11.6079	0.225029	12.2572	0.225029	11.2766	0.225029	3.80641	0.0396879	1.16621	1.82906	-1.07887	1.56838	-1.25819	-1.97332	0.99	0.253561	0.0203443	0.117598
NCF1	12815192	9.10421	0.182495	9.29014	0.182495	8.46029	0.182495	8.98772	0.182495	3.80596	0.0397006	1.13755	-1.56256	-1.08409	-1.7775	-1.23321	1.44136	0.99	0.0235373	0.367911	0.0743446
KCNJ11	12728863	7.13103	0.0762824	6.91422	0.0762824	7.01806	0.0762824	6.78189	0.0762824	3.80553	0.0397129	-1.16217	-1.08145	-1.2738	1.07463	-1.09605	-1.17786	0.99	0.133861	0.901174	0.0117208
	12911089	6.81466	0.071641	7.02	0.071641	7.12678	0.071641	7.09196	0.071641	3.8037	0.0397651	1.15296	1.24153	1.21192	1.07682	1.05114	-1.02443	0.99	0.0200164	0.119542	0.257045
LOC787574	12888448	4.85597	0.0942829	4.97863	0.0942829	4.75306	0.0942829	4.54439	0.0942829	3.80329	0.0397768	1.08873	-1.07394	-1.24107	-1.16924	-1.35119	-1.15562	0.99	0.0146609	0.104366	0.656415
HPDL	12844511	7.17801	0.0800178	7.14808	0.0800178	6.853	0.0800178	6.95316	0.0800178	3.80263	0.0397956	-1.02096	-1.25267	-1.16866	-1.22695	-1.14466	1.07189	0.99	0.00697202	0.432144	0.668608
MIR453	12788790	6.36476	0.234241	5.52069	0.234241	6.55935	0.234241	6.00224	0.234241	3.80126	0.0398348	-1.79512	1.1444	-1.28567	2.05433	1.39625	-1.47132	0.99	0.174541	0.551614	0.0112551
MIR1343	12911119	10.5349	0.123099	10.5206	0.123099	10.8846	0.123099	10.9886	0.123099	3.79776	0.0399351	-1.00989	1.27432	1.36957	1.28692	1.38312	1.07475	0.99	0.00609769	0.639788	0.721647
	12915639	5.26933	0.0229964	5.35126	0.0229964	5.24971	0.0229964	5.27309	0.0229964	3.79463	0.0400251	1.05843	-1.01369	1.00261	-1.07293	-1.05568	1.01634	0.99	0.0549203	0.227139	0.0409577
LRRC14	12725913	7.85597	0.0959794	7.59779	0.0959794	7.5437	0.0959794	7.40988	0.0959794	3.7931	0.040069	-1.19597	-1.24166	-1.36234	-1.03821	-1.13911	-1.09719	0.99	0.0229847	0.529268	0.0637567
CHCHD3	12855931	12.1993	0.0960548	12.2705	0.0960548	11.9489	0.0960548	11.8869	0.0960548	3.79271	0.0400804	1.05059	-1.18956	-1.24184	-1.24974	-1.30466	-1.04395	0.99	0.00633231	0.50113	0.962795
LOC100139318	12773860	7.38076	0.0928979	7.7915	0.0928979	7.62887	0.0928979	7.47086	0.0928979	3.79121	0.0401234	1.32937	1.18765	1.06445	-1.11933	-1.24889	-1.11575	0.99	0.70311	0.00987705	0.19875
XRN2	12715298	12.0881	0.212446	12.5912	0.212446	11.5982	0.212446	11.9291	0.212446	3.7898	0.0401641	1.41728	-1.4044	-1.11647	-1.99042	-1.58236	1.25788	0.99	0.0189085	0.69253	0.073229
LRIG3	12858199	7.009	0.0964125	7.45485	0.0964125	7.1433	0.0964125	7.16537	0.0964125	3.78885	0.0401916	1.36212	1.09756	1.11448	-1.24104	-1.2222	1.01542	0.99	0.436592	0.048332	0.0319255
VPS72	12840065	10.3613	0.0967942	10.0417	0.0967942	10.3568	0.0967942	10.4823	0.0967942	3.78883	0.0401921	-1.24797	-1.00309	1.08751	1.24412	1.35717	1.09087	0.99	0.0437608	0.0402732	0.335817
PTRH1	12704352	8.7135	0.0967464	8.80638	0.0967464	9.14276	0.0967464	8.81138	0.0967464	3.788	0.0402163	1.0665	1.34654	1.0702	1.26258	1.00347	-1.25822	0.99	0.0444508	0.0487754	0.241322
KPNA1	12686354	11.1562	0.115618	10.8859	0.115618	11.1636	0.115618	10.7002	0.115618	3.78616	0.0402694	-1.206	1.00514	-1.37173	1.2122	-1.13743	-1.37879	0.99	0.455393	0.419814	0.00803041
CCBE1	12810233	11.2812	0.172657	10.6376	0.172657	11.0346	0.172657	10.5718	0.172657	3.78604	0.0402731	-1.5622	-1.18641	-1.63512	1.31674	-1.04668	-1.37821	0.99	0.383399	0.610151	0.00757644
MKL2	12812255	9.99487	0.113267	10.2658	0.113267	9.93458	0.113267	10.3986	0.113267	3.78544	0.0402905	1.20657	-1.04268	1.32297	-1.25806	1.09648	1.37943	0.99	0.754164	0.410523	0.00702821
LOC787396	12721339	8.50174	0.104894	8.80887	0.104894	8.33434	0.104894	8.43826	0.104894	3.78468	0.0403125	1.23724	-1.12304	-1.04498	-1.38946	-1.29289	1.0747	0.99	0.0247942	0.351874	0.0737142
MIR107	12823293	9.0393	0.154421	9.11702	0.154421	9.4874	0.154421	9.67071	0.154421	3.78433	0.0403225	1.05535	1.36424	1.54908	1.2927	1.46785	1.13549	0.99	0.0070379	0.738317	0.414535
SAMSN1	12681452	15.3404	0.392411	15.16	0.392411	16.7921	0.392411	15.3216	0.392411	3.78417	0.0403272	-1.13318	2.7353	-1.01313	3.09958	1.11849	-2.77123	0.99	0.0622573	0.126126	0.0571849
GRK4	12874104	9.71765	0.246046	9.29419	0.246046	10.1699	0.246046	9.09121	0.246046	3.78238	0.0403792	-1.34114	1.36814	-1.54375	1.83486	-1.15108	-2.11207	0.99	0.621703	0.207775	0.0100378
GPRC5B	12816911	10.8922	0.318623	10.7514	0.318623	9.54066	0.318623	10.1434	0.318623	3.78064	0.0404299	-1.10248	-2.55176	-1.68028	-2.31457	-1.5241	1.51865	0.99	0.00962936	0.265957	0.482319
DNAH1	12800154	6.75504	0.0492629	6.55133	0.0492629	6.55295	0.0492629	6.61045	0.0492629	3.77902	0.0404769	-1.15166	-1.15037	-1.10542	1.00113	1.04183	1.04066	0.99	0.172376	0.0211328	0.163574
MIR2438	12856473	12.7664	0.131163	12.6585	0.131163	13.0261	0.131163	13.2229	0.131163	3.77759	0.0405187	-1.07766	1.19721	1.37221	1.29018	1.47877	1.14617	0.99	0.00850955	0.267972	0.740478
MIR2298	12698237	9.07445	0.0667486	9.35163	0.0667486	9.17415	0.0667486	9.32155	0.0667486	3.77759	0.0405188	1.21183	1.07155	1.18682	-1.13091	-1.02107	1.10757	0.99	0.611489	0.350135	0.00791387
POLR1B	12698621	9.14283	0.130544	8.71219	0.130544	8.54124	0.130544	8.83355	0.130544	3.7771	0.040533	-1.34783	-1.51739	-1.2391	-1.1258	1.08776	1.2246	0.99	0.0907189	0.0169939	0.605888
	12857264	15.0511	0.192887	14.298	0.192887	14.9149	0.192887	15.1185	0.192887	3.77521	0.0405882	-1.68541	-1.09899	1.04783	1.5336	1.76602	1.15155	0.99	0.101434	0.0289645	0.179794
BOLA-DQB	12801188	8.85244	1.04005	12.8292	1.04005	11.3962	1.04005	8.67993	1.04005	3.77204	0.0406809	15.744	5.83098	-1.12702	-2.70007	-17.7439	-6.57165	0.99	0.455138	0.00738681	0.555823
LOC785825	12682849	5.43626	0.26298	5.18174	0.26298	5.77056	0.26298	6.36327	0.26298	3.77143	0.0406987	-1.19293	1.26077	1.90134	1.50402	2.26817	1.50807	0.99	0.0137784	0.133196	0.532315
	12762828	11.0257	0.307221	11.0393	0.307221	11.1669	0.307221	9.89101	0.307221	3.77023	0.0407342	1.00951	1.1028	-2.19567	1.09242	-2.21654	-2.42139	0.99	0.127124	0.0576849	0.062407
LOC100299275	12876467	6.07781	0.0981415	5.9546	0.0981415	5.88554	0.0981415	5.6264	0.0981415	3.76845	0.0407864	-1.08916	-1.14256	-1.36738	-1.04903	-1.25545	-1.19677	0.99	0.0211158	0.501785	0.0751905
HESX1	12797381	5.95898	0.0881813	5.98353	0.0881813	6.07826	0.0881813	6.33342	0.0881813	3.76736	0.0408185	1.01717	1.0862	1.29634	1.06786	1.27446	1.19347	0.99	0.0207816	0.215529	0.13872
MYCBPAP	12768182	5.96249	0.0825349	5.83292	0.0825349	6.03116	0.0825349	6.21711	0.0825349	3.76545	0.0408747	-1.09396	1.04875	1.19302	1.14729	1.30512	1.13757	0.99	0.0178188	0.0801282	0.738561
LOC100335861	12915003	7.76832	0.0822098	7.54893	0.0822098	7.77557	0.0822098	7.93748	0.0822098	3.76506	0.0408861	-1.16425	1.00504	1.1244	1.17011	1.30908	1.11877	0.99	0.033079	0.0388319	0.732669
FABP3	12774529	12.6584	0.393135	11.0269	0.393135	12.0194	0.393135	11.1781	0.393135	3.76183	0.0409814	-3.09825	-1.55722	-2.79007	1.9896	1.11046	-1.79169	0.99	0.546581	0.334774	0.00845378
SSPO	12849130	7.62209	0.0605487	7.58974	0.0605487	7.85128	0.0605487	7.71839	0.0605487	3.76113	0.0410022	-1.02268	1.17218	1.06903	1.19876	1.09327	-1.09649	0.99	0.012031	0.422624	0.197452
KRTAP10-2	12687178	8.16349	0.191844	8.14718	0.191844	8.84025	0.191844	8.75227	0.191844	3.75673	0.0411326	-1.01137	1.59855	1.50397	1.61672	1.52107	-1.06288	0.99	0.00587861	0.854944	0.790388
LOC783012	12824568	6.93966	0.106151	7.26361	0.106151	7.05603	0.106151	6.77416	0.106151	3.75664	0.0411354	1.25175	1.084	-1.12155	-1.15475	-1.4039	-1.21576	0.99	0.104331	0.0145273	0.846174
LEPREL1	12679954	12.0942	0.11777	12.1546	0.11777	12.3837	0.11777	12.5932	0.11777	3.75603	0.0411533	1.04275	1.22222	1.41321	1.1721	1.35527	1.15627	0.99	0.00934364	0.53867	0.274228
LAG3	12866068	8.41002	0.059693	8.42538	0.059693	8.18262	0.059693	8.27424	0.059693	3.75474	0.0411919	1.0107	-1.17072	-1.09869	-1.18325	-1.11044	1.06557	0.99	0.00805939	0.534949	0.387851
C3H1orf54	12847392	11.988	0.118165	12.5275	0.118165	12.2402	0.118165	12.128	0.118165	3.75414	0.0412097	1.45347	1.191	1.10187	-1.22038	-1.3191	-1.08089	0.99	0.544564	0.0173534	0.0957258
STARD10	12732086	6.82173	0.0947476	7.19961	0.0947476	6.79988	0.0947476	6.93124	0.0947476	3.75329	0.0412348	1.29943	-1.01526	1.07887	-1.31926	-1.20444	1.09533	0.99	0.15157	0.217718	0.0197655
ASCL2	12832037	6.7656	0.092083	7.04965	0.092083	6.63337	0.092083	6.73477	0.092083	3.75264	0.0412541	1.21761	-1.09598	-1.02159	-1.33448	-1.2439	1.07282	0.99	0.0318661	0.340901	0.0582642
LOC615103	12791157	10.7675	0.117531	10.6987	0.117531	11.1904	0.117531	11.0205	0.117531	3.75186	0.0412776	-1.04881	1.34069	1.19174	1.40613	1.24991	-1.12498	0.99	0.00809156	0.674594	0.330012
LOC100296550	12726404	5.83514	0.140033	5.76367	0.140033	5.91625	0.140033	6.3663	0.140033	3.75168	0.0412828	-1.05079	1.05783	1.44509	1.11156	1.51849	1.36609	0.99	0.031081	0.0872369	0.201391
LOC784148	12888202	6.47675	0.0791631	6.37002	0.0791631	6.24865	0.0791631	6.60858	0.0791631	3.74978	0.0413396	-1.07679	-1.1713	1.09568	-1.08777	1.17981	1.28336	0.99	0.94845	0.0122014	0.135763
MAPK8IP2	12862652	8.19451	0.0762224	8.43605	0.0762224	8.32752	0.0762224	8.10018	0.0762224	3.74655	0.041436	1.18226	1.09658	-1.06757	-1.07814	-1.26214	-1.17067	0.99	0.208002	0.00961409	0.927259
CYP4A22	12838617	5.11765	0.102091	5.28875	0.102091	5.3929	0.102091	5.58993	0.102091	3.74561	0.0414644	1.12592	1.21021	1.3873	1.07486	1.23215	1.14634	0.99	0.0153706	0.901058	0.0965448
DOPEY2	12680337	8.51181	0.152283	8.92707	0.152283	9.08229	0.152283	8.50066	0.152283	3.74521	0.0414762	1.33354	1.48502	-1.00776	1.11359	-1.34389	-1.49654	0.99	0.644673	0.00666423	0.594909
LOC100139843	12682899	7.02424	0.159692	7.45104	0.159692	6.93377	0.159692	7.55881	0.159692	3.74473	0.0414905	1.34425	-1.06472	1.44851	-1.43125	1.07756	1.54225	0.99	0.957706	0.54642	0.00641957
A1BG	12757564	8.39325	0.131832	8.27014	0.131832	8.26328	0.131832	8.80474	0.131832	3.74184	0.0415774	-1.08908	-1.09427	1.33006	-1.00476	1.44854	1.45544	0.99	0.150803	0.0268855	0.138572
LYZL1	12719058	6.60494	0.0660257	6.59628	0.0660257	6.74435	0.0660257	6.86491	0.0660257	3.74123	0.0415957	-1.00602	1.10146	1.19746	1.10808	1.20466	1.08716	0.99	0.00936248	0.347141	0.413325
C28H10ORF10	12827009	6.79618	0.101461	7.17218	0.101461	6.78214	0.101461	6.76382	0.101461	3.73872	0.0416715	1.29774	-1.00978	-1.02269	-1.31043	-1.32718	-1.01278	0.99	0.0594509	0.0758168	0.103391
ABHD2	12789601	11.9184	0.113599	12.2084	0.113599	11.7166	0.113599	11.7746	0.113599	3.73754	0.0417069	1.2226	-1.15011	-1.10483	-1.40613	-1.35076	1.04099	0.99	0.0161235	0.327336	0.151631
LOC100336508	12827493	10.3047	0.0963939	10.1934	0.0963939	9.90242	0.0963939	10.288	0.0963939	3.73745	0.0417098	-1.08022	-1.32157	-1.01164	-1.22343	1.06779	1.30636	0.99	0.136541	0.0242161	0.180361
CLPH	12871217	6.19288	0.0745635	6.25038	0.0745635	6.48802	0.0745635	6.4438	0.0745635	3.7354	0.0417715	1.04066	1.22701	1.18996	1.17906	1.14347	-1.03113	0.99	0.00662764	0.508096	0.930523
LOC100294744	12698022	6.61388	0.0919893	6.57773	0.0919893	6.94584	0.0919893	6.58356	0.0919893	3.73443	0.0418009	-1.02537	1.25872	-1.02124	1.29066	1.00405	-1.28546	0.99	0.0912387	0.101646	0.0511946
BZW2	12849324	11.7461	0.218131	11.2972	0.218131	11.8588	0.218131	10.9451	0.218131	3.73055	0.0419184	-1.36495	1.08127	-1.74231	1.47588	-1.27646	-1.8839	0.99	0.5932	0.307581	0.00880076
	12911765	8.32063	0.231457	8.40666	0.231457	9.08644	0.231457	9.17907	0.231457	3.73025	0.0419274	1.06145	1.70032	1.81308	1.60189	1.70812	1.06631	0.99	0.00607758	0.988859	0.706284
ZNF275	12904825	11.3285	0.201813	11.0337	0.201813	10.4814	0.201813	10.6101	0.201813	3.72795	0.0419973	-1.22676	-1.79901	-1.64544	-1.46647	-1.34129	1.09333	0.99	0.00839801	0.314659	0.687902
PRPF4	12889863	11.2931	0.0597991	11.2021	0.0597991	11.1773	0.0597991	11.4324	0.0597991	3.727	0.0420264	-1.06513	-1.08363	1.10139	-1.01737	1.17312	1.1935	0.99	0.357372	0.0134531	0.194949
LOC100336494	12786787	10.4189	0.0742684	10.1884	0.0742684	10.5104	0.0742684	10.2786	0.0742684	3.72698	0.0420269	-1.17324	1.06544	-1.10215	1.25002	1.0645	-1.17428	0.99	0.244892	0.993292	0.00898422
LOC516429	12912937	9.48855	0.122023	9.33313	0.122023	9.70151	0.122023	9.86909	0.122023	3.72387	0.0421216	-1.11374	1.15907	1.30183	1.2909	1.4499	1.12317	0.99	0.00973852	0.210336	0.96108
GBAS	12814450	12.9696	0.138466	12.7016	0.138466	12.402	0.138466	12.9567	0.138466	3.72311	0.0421447	-1.20418	-1.48206	-1.00903	-1.23076	1.1934	1.46879	0.99	0.281155	0.0116865	0.321157
	12913163	8.8429	0.0754126	8.91435	0.0754126	8.75128	0.0754126	9.09473	0.0754126	3.72194	0.0421806	1.05078	-1.06556	1.19072	-1.11967	1.13318	1.26878	0.99	0.567112	0.0964812	0.017573
PTGS2	12738576	7.82863	0.558603	8.25793	0.558603	10.1986	0.558603	8.13479	0.558603	3.72159	0.0421913	1.34658	5.16926	1.23641	3.83881	-1.0891	-4.18085	0.99	0.0673291	0.0454844	0.169156
RBMX	12907794	13.7598	0.0456905	13.8169	0.0456905	13.9634	0.0456905	13.8058	0.0456905	3.72139	0.0421973	1.04041	1.15157	1.03245	1.10684	-1.00771	-1.11537	0.99	0.0568502	0.0367641	0.29357
ZNF775	12911031	8.6415	0.106328	8.61978	0.106328	8.92421	0.106328	9.03055	0.106328	3.71836	0.0422903	-1.01517	1.21648	1.30953	1.23493	1.32939	1.07649	0.99	0.00681595	0.55827	0.697696
LOC511509	12769645	5.66394	0.197809	4.83041	0.197809	4.89157	0.197809	5.20784	0.197809	3.71762	0.042313	-1.78204	-1.70807	-1.37183	1.0433	1.29902	1.2451	0.99	0.33784	0.0131706	0.215544
XPNPEP1	12822034	9.69623	0.0898397	9.48	0.0898397	9.27646	0.0898397	9.53426	0.0898397	3.71715	0.0423272	-1.16169	-1.33771	-1.11881	-1.15152	1.03833	1.19565	0.99	0.0646477	0.0216467	0.820936
COPS8	12840851	10.5048	0.145792	9.96889	0.145792	10.6046	0.145792	10.4251	0.145792	3.71682	0.0423374	-1.4499	1.07159	-1.05683	1.5537	1.37193	-1.13249	0.99	0.0807852	0.244993	0.0303875
DNAJC5	12718089	10.6241	0.171545	10.6089	0.171545	9.99905	0.171545	10.0969	0.171545	3.71625	0.0423549	-1.01059	-1.54222	-1.4411	-1.52605	-1.426	1.07016	0.99	0.00617912	0.747497	0.813744
DEGS1	12738972	13.1196	0.124823	12.5831	0.124823	13.0515	0.124823	12.8538	0.124823	3.71522	0.0423865	-1.45035	-1.04832	-1.20226	1.3835	1.20635	-1.14685	0.99	0.43291	0.199815	0.0123615
AHSA1	12691128	11.0175	0.293684	10.5523	0.293684	11.8332	0.293684	10.734	0.293684	3.71423	0.0424169	-1.38058	1.76012	-1.21714	2.42999	1.13428	-2.14232	0.99	0.115232	0.301704	0.0206576
LOC100335845	12915323	7.58111	0.069363	7.5829	0.069363	7.79453	0.069363	7.82985	0.069363	3.71414	0.0424197	1.00124	1.15943	1.18816	1.15799	1.18669	1.02478	0.99	0.00612717	0.81308	0.793636
LOC526979	12874582	6.85542	0.127964	7.37436	0.127964	7.3819	0.127964	7.18654	0.127964	3.71311	0.0424515	1.4329	1.44042	1.25799	1.00525	-1.13903	-1.14501	0.99	0.210389	0.0163144	0.230121
LOC530342	12813370	7.89302	0.0878178	8.24995	0.0878178	7.93145	0.0878178	7.91474	0.0878178	3.71104	0.0425153	1.2807	1.027	1.01517	-1.24703	-1.26156	-1.01165	0.99	0.116868	0.0548136	0.0766307
TMEM8B	12888667	8.07836	0.0948024	8.46687	0.0948024	8.24188	0.0948024	8.08364	0.0948024	3.71099	0.0425168	1.30904	1.12002	1.00366	-1.16877	-1.30426	-1.11593	0.99	0.269087	0.0137377	0.247935
LOC782221	12835162	5.6605	0.151157	5.6703	0.151157	6.16113	0.151157	6.17789	0.151157	3.71028	0.0425386	1.00682	1.41484	1.43137	1.40526	1.42168	1.01168	0.99	0.00594221	0.982017	0.931447
LOC787991	12863239	5.85834	0.160761	6.16626	0.160761	5.61486	0.160761	6.304	0.160761	3.71018	0.0425419	1.23792	-1.18385	1.36193	-1.46551	1.10018	1.61232	0.99	0.747897	0.258688	0.00917221
MIR199C	12760470	9.7134	0.0724717	9.67055	0.0724717	9.85565	0.0724717	9.97647	0.0724717	3.70836	0.042598	-1.03015	1.10362	1.20003	1.13689	1.23621	1.08735	0.99	0.00932733	0.280875	0.600446
LEPR	12843071	8.12135	0.100791	7.86349	0.100791	8.32433	0.100791	8.0112	0.100791	3.70832	0.0425994	-1.19571	1.15107	-1.07934	1.37634	1.10781	-1.2424	0.99	0.107479	0.788617	0.0151039
LOC100337030	12774274	17.3523	0.252529	16.7149	0.252529	17.6877	0.252529	17.7944	0.252529	3.70769	0.0426187	-1.55555	1.26173	1.35856	1.96268	2.1133	1.07674	0.99	0.016001	0.166413	0.314022
HRNR	12841954	6.11444	0.0849122	6.5104	0.0849122	6.27511	0.0849122	6.26623	0.0849122	3.70646	0.0426568	1.31581	1.1178	1.11094	-1.17714	-1.18441	-1.00618	0.99	0.631813	0.0345203	0.0417359
NEK7	12737631	12.1272	0.0981699	11.9988	0.0981699	11.6779	0.0981699	11.9278	0.0981699	3.70559	0.0426837	-1.09306	-1.36535	-1.14816	-1.24911	-1.05041	1.18917	0.99	0.0211941	0.0780021	0.547356
STK17A	12854087	13.573	0.0973784	13.6488	0.0973784	13.2233	0.0973784	13.4256	0.0973784	3.7052	0.0426958	1.05393	-1.27434	-1.10757	-1.34306	-1.1673	1.15057	0.99	0.0123319	0.527994	0.178779
FGA	12743052	6.39554	0.0720499	6.46926	0.0720499	6.71601	0.0720499	6.56953	0.0720499	3.70516	0.042697	1.05243	1.24874	1.12818	1.18654	1.07198	-1.10686	0.99	0.0128439	0.152415	0.622754
MIR2340	12760472	9.6782	0.245028	9.33561	0.245028	10.3683	0.245028	9.40442	0.245028	3.7046	0.0427143	-1.26803	1.61345	-1.20897	2.0459	1.04885	-1.95061	0.99	0.147407	0.228886	0.020561
LOC100138783	12703404	7.87246	0.127468	7.74106	0.127468	7.32536	0.127468	7.79834	0.127468	3.70233	0.0427848	-1.09535	-1.46114	-1.05272	-1.33395	1.0405	1.38798	0.99	0.0787588	0.0353567	0.205102
COL21A1	12802836	7.35068	0.105747	7.54442	0.105747	7.74193	0.105747	7.79768	0.105747	3.70135	0.0428154	1.14373	1.31153	1.3632	1.14672	1.1919	1.0394	0.99	0.0101334	0.526411	0.260987
LDHA	12832629	8.46308	0.149396	8.29366	0.149396	8.80554	0.149396	8.13461	0.149396	3.70132	0.0428163	-1.12461	1.26791	-1.25568	1.42591	-1.11655	-1.59209	0.99	0.550788	0.119096	0.0156768
TIMP3	12857108	15.0598	0.237892	14.3312	0.237892	15.0765	0.237892	14.2276	0.237892	3.69677	0.0429579	-1.65706	1.01163	-1.7804	1.67632	-1.07443	-1.8011	0.99	0.858125	0.804746	0.00616037
EFCAB5	12763852	6.91736	0.0635641	6.77299	0.0635641	6.97421	0.0635641	7.0644	0.0635641	3.69655	0.0429648	-1.10524	1.04019	1.10729	1.14966	1.22383	1.06451	0.99	0.0179527	0.0898501	0.677547
CCDC36	12799300	6.52544	0.138078	6.47074	0.138078	6.37646	0.138078	6.97401	0.138078	3.69619	0.042976	-1.03864	-1.10879	1.36469	-1.06753	1.41742	1.51315	0.99	0.223744	0.0359273	0.0728979
NME6	12795069	6.29648	0.0752547	6.64985	0.0752547	6.49036	0.0752547	6.46455	0.0752547	3.69549	0.0429981	1.27754	1.14383	1.12355	-1.11689	-1.13705	-1.01805	0.99	0.955504	0.026945	0.0502217
GPR176	12695496	6.50752	0.0736283	6.64501	0.0736283	6.85152	0.0736283	6.68083	0.0736283	3.69439	0.0430326	1.09999	1.26927	1.12764	1.15389	1.02514	-1.12559	0.99	0.0241307	0.0582858	0.825457
LOC788079	12882418	8.27524	0.193424	7.98046	0.193424	8.4335	0.193424	8.87153	0.193424	3.69438	0.0430326	-1.22669	1.11594	1.51182	1.36891	1.85454	1.35476	0.99	0.0188683	0.0825323	0.717593
CTTNBP2NL	12846842	11.9755	0.14435	11.8456	0.14435	11.5084	0.14435	11.3855	0.14435	3.69384	0.0430495	-1.09426	-1.3823	-1.50527	-1.26324	-1.37561	-1.08896	0.99	0.00747174	0.981054	0.398227
LOC515828	12735682	10.0346	0.146409	10.5323	0.146409	10.6956	0.146409	10.4079	0.146409	3.68869	0.043211	1.41191	1.58117	1.29529	1.11988	-1.09004	-1.22071	0.99	0.0917774	0.019959	0.487158
TMOD4	12836705	7.30772	0.082437	7.55087	0.082437	7.65556	0.082437	7.62848	0.082437	3.68752	0.043248	1.18357	1.27265	1.24899	1.07526	1.05527	-1.01895	0.99	0.0240775	0.127145	0.21455
PGLYRP4	12841351	7.21073	0.145981	7.06854	0.145981	7.51828	0.145981	7.68224	0.145981	3.68715	0.0432596	-1.10358	1.2376	1.38656	1.36579	1.53018	1.12036	0.99	0.00829214	0.315004	0.94179
RTN2	12755996	5.31741	0.0589251	5.562	0.0589251	5.51032	0.0589251	5.38042	0.0589251	3.68448	0.0433436	1.18475	1.14306	1.04464	-1.03647	-1.13412	-1.09422	0.99	0.925014	0.00795633	0.349701
TNRC6B	12860591	13.7352	0.0930522	13.6683	0.0930522	13.9416	0.0930522	13.5107	0.0930522	3.68307	0.0433883	-1.04746	1.15383	-1.16835	1.20859	-1.11541	-1.34807	0.99	0.797398	0.0741621	0.0202289
MAPK15	12724938	8.34213	0.0528806	8.27378	0.0528806	8.39709	0.0528806	8.51376	0.0528806	3.68211	0.0434184	-1.04851	1.03883	1.12633	1.08923	1.18098	1.08423	0.99	0.0163814	0.105732	0.655918
LOC100337451	12842541	9.40955	0.134585	9.37795	0.134585	8.89859	0.134585	9.44778	0.134585	3.67969	0.043495	-1.02215	-1.425	1.02685	-1.39413	1.04959	1.46326	0.99	0.127175	0.051924	0.0785457
LPP	12685065	13.8196	0.150913	13.2513	0.150913	13.8532	0.150913	13.8145	0.150913	3.67842	0.0435352	-1.48285	1.02355	-1.00356	1.51777	1.47759	-1.02719	0.99	0.0714294	0.104748	0.0673009
LOC100298394	12896321	6.3632	0.260315	6.18633	0.260315	7.32224	0.260315	6.60141	0.260315	3.67692	0.0435829	-1.13044	1.94401	1.17952	2.19758	1.33337	-1.64813	0.99	0.0216005	0.31671	0.110298
LOC616099	12881809	4.8448	0.116985	5.33234	0.116985	5.029	0.116985	4.8696	0.116985	3.67668	0.0435906	1.40206	1.13619	1.01734	-1.234	-1.37816	-1.11683	0.99	0.256877	0.0171165	0.186106
SLC28A2	12695950	6.8927	0.0662926	7.05624	0.0662926	7.01555	0.0662926	7.20093	0.0662926	3.67474	0.0436523	1.12003	1.08888	1.23818	-1.0286	1.10549	1.13711	0.99	0.0665334	0.871903	0.0219113
BNIP1	12786570	8.40982	0.0931952	8.33194	0.0931952	8.02294	0.0931952	8.38137	0.0931952	3.67416	0.0436705	-1.05547	-1.30756	-1.01992	-1.23884	1.03486	1.28202	0.99	0.095322	0.0373296	0.158156
STIP1	12831915	13.1281	0.25813	12.8012	0.25813	13.7548	0.25813	12.6347	0.25813	3.67048	0.0437879	-1.25436	1.54395	-1.40786	1.93667	-1.12237	-2.17366	0.99	0.390358	0.150382	0.0159554
KCNA6	12867912	6.03552	0.0735986	5.98426	0.0735986	6.04013	0.0735986	6.29739	0.0735986	3.67032	0.0437928	-1.03617	1.0032	1.19903	1.03949	1.2424	1.1952	0.99	0.0518424	0.0579606	0.186989
	12914401	6.97993	0.207893	6.81781	0.207893	7.33536	0.207893	6.37552	0.207893	3.66866	0.043846	-1.11893	1.27937	-1.52035	1.43152	-1.35876	-1.94509	0.99	0.83803	0.0791335	0.0193668
FKBP4	12865041	11.3482	0.247703	10.8524	0.247703	11.8821	0.247703	10.9216	0.247703	3.66774	0.0438752	-1.4101	1.44781	-1.34411	2.04156	1.0491	-1.94602	0.99	0.246912	0.366706	0.0123798
SAAL1	12726998	9.61372	0.0875672	9.85011	0.0875672	9.60727	0.0875672	9.93821	0.0875672	3.66759	0.0438803	1.17804	-1.00448	1.25223	-1.18332	1.06297	1.25783	0.99	0.649372	0.599162	0.00709417
LOC100140105	12842288	5.96314	0.178434	5.44581	0.178434	5.98306	0.178434	6.26595	0.178434	3.66697	0.0439001	-1.4313	1.0139	1.23355	1.4512	1.76558	1.21663	0.99	0.0364478	0.0446082	0.523629
ELOVL5	12806809	11.2091	0.203638	10.6129	0.203638	10.9295	0.203638	10.3084	0.203638	3.66435	0.0439841	-1.51173	-1.21384	-1.86691	1.24541	-1.23495	-1.53802	0.99	0.17712	0.952304	0.0112991
MSLNL	12817628	6.95245	0.107052	6.93335	0.107052	7.03676	0.107052	7.37388	0.107052	3.66117	0.0440861	-1.01333	1.06018	1.33925	1.07431	1.35711	1.26323	0.99	0.0305183	0.122027	0.163246
AEBP2	12867608	13.885	0.110716	13.6928	0.110716	14.1003	0.110716	13.6306	0.110716	3.66117	0.0440862	-1.14254	1.16091	-1.19286	1.32639	-1.04404	-1.3848	0.99	0.502533	0.234117	0.0112889
FAT2	12885827	6.85475	0.0784946	7.20218	0.0784946	7.05274	0.0784946	7.13253	0.0784946	3.65997	0.0441248	1.27229	1.1471	1.21232	-1.10913	-1.04946	1.05686	0.99	0.429571	0.113955	0.0185652
ARMCX6	12910395	8.26626	0.109851	8.02842	0.109851	8.10491	0.109851	7.7626	0.109851	3.65981	0.0441299	-1.17923	-1.11833	-1.41781	1.05445	-1.20232	-1.26779	0.99	0.0756756	0.642973	0.0215479
SLC25A16	12827782	10.5657	0.113488	10.6948	0.113488	10.1879	0.113488	10.4238	0.113488	3.65965	0.0441351	1.09363	-1.29936	-1.10336	-1.42102	-1.20666	1.17764	0.99	0.0143925	0.646488	0.133767
MIR2408	12832479	7.84222	0.101917	7.77665	0.101917	7.95783	0.101917	8.2188	0.101917	3.65769	0.0441984	-1.0465	1.08343	1.29826	1.13381	1.35863	1.19829	0.99	0.0180531	0.135127	0.356673
CLCN6	12739856	9.52046	0.108904	9.03303	0.108904	9.3261	0.108904	9.17938	0.108904	3.6575	0.0442042	-1.40195	-1.14421	-1.26671	1.22525	1.10676	-1.10706	0.99	0.829238	0.143739	0.0130436
TGIF2LX	12910794	6.2459	0.0725155	6.03186	0.0725155	6.22783	0.0725155	5.9703	0.0725155	3.65474	0.0442933	-1.15994	-1.0126	-1.2105	1.1455	-1.04359	-1.19543	0.99	0.593049	0.769422	0.00693587
LOC100337444	12896573	8.78451	0.151122	9.2844	0.151122	8.64452	0.151122	9.0834	0.151122	3.65354	0.0443324	1.4141	-1.1019	1.2302	-1.55819	-1.14949	1.35555	0.99	0.281293	0.843404	0.0090886
NFYC	12846329	12.1408	0.0879317	12.122	0.0879317	11.7763	0.0879317	11.9868	0.0879317	3.65346	0.044335	-1.01305	-1.28737	-1.11265	-1.27079	-1.09832	1.15703	0.99	0.0148539	0.217071	0.297036
KDM3A	12707105	11.6836	0.137955	11.7974	0.137955	12.1181	0.137955	11.4888	0.137955	3.65137	0.0444025	1.08211	1.35151	-1.14453	1.24896	-1.23851	-1.54684	0.99	0.656126	0.0195412	0.0863242
SLURP1	12723608	5.94465	0.0999237	6.32119	0.0999237	6.12764	0.0999237	5.90469	0.0999237	3.65135	0.0444033	1.29822	1.13523	-1.02809	-1.14357	-1.33468	-1.16711	0.99	0.265318	0.0110731	0.457028
MIR433	12788858	7.85889	0.0594062	7.93602	0.0594062	8.12857	0.0594062	7.96568	0.0594062	3.64988	0.0444509	1.05492	1.20554	1.07683	1.14278	1.02078	-1.11952	0.99	0.026934	0.0662735	0.484252
LOC616326	12791195	8.02188	0.0812837	8.13058	0.0812837	7.764	0.0812837	8.01539	0.0812837	3.6477	0.0445217	1.07825	-1.19572	-1.00451	-1.28929	-1.08311	1.19036	0.99	0.0405764	0.397284	0.0468547
RRAGB	12903414	9.61068	0.11028	9.74349	0.11028	10.1084	0.11028	9.80906	0.11028	3.64329	0.0446656	1.09643	1.41195	1.14741	1.28777	1.04649	-1.23056	0.99	0.0252919	0.0737333	0.464883
	12912261	5.41416	0.194367	5.72686	0.194367	5.39342	0.194367	6.18783	0.194367	3.64309	0.0446721	1.24203	-1.01448	1.70962	-1.26001	1.37647	1.73437	0.99	0.279552	0.238964	0.014677
FBXO45	12681358	8.00028	0.111447	8.39288	0.111447	7.92563	0.111447	7.9925	0.111447	3.64223	0.0447001	1.31275	-1.0531	-1.00541	-1.38247	-1.31985	1.04744	0.99	0.0544412	0.169601	0.0616224
PRMT3	12834128	10.4793	0.0936458	10.336	0.0936458	10.1323	0.0936458	10.0999	0.0936458	3.64147	0.044725	-1.10439	-1.27189	-1.30082	-1.15167	-1.17786	-1.02275	0.99	0.00896102	0.565094	0.366693
RNASE1	12688130	6.35564	0.116006	6.02712	0.116006	6.17614	0.116006	5.83444	0.116006	3.64049	0.044757	-1.25572	-1.13249	-1.43515	1.10882	-1.14289	-1.26726	0.99	0.134661	0.9556	0.0136073
ERMAP	12844695	6.43395	0.0916762	6.81864	0.0916762	6.46541	0.0916762	6.54596	0.0916762	3.64021	0.0447661	1.30558	1.02205	1.08073	-1.27742	-1.20805	1.05742	0.99	0.212892	0.123053	0.0260628
ZNF227	12752337	8.4658	0.12984	8.3542	0.12984	8.20015	0.12984	7.89509	0.12984	3.6397	0.0447829	-1.08042	-1.20217	-1.48525	-1.11269	-1.3747	-1.23547	0.99	0.0163151	0.470597	0.134577
LOC100336417	12713447	16.1064	0.0502705	16.0347	0.0502705	16.2086	0.0502705	15.9885	0.0502705	3.63853	0.0448214	-1.05094	1.07343	-1.08517	1.1281	-1.03258	-1.16485	0.99	0.587939	0.165495	0.0132633
MIR2370	12797808	8.86267	0.113037	9.0905	0.113037	8.56423	0.113037	8.85316	0.113037	3.6382	0.0448321	1.17107	-1.22982	-1.00661	-1.4402	-1.17881	1.22174	0.99	0.0354067	0.791514	0.0412414
PTPN13	12698608	10.8451	0.185338	10.1805	0.185338	10.8052	0.185338	10.2506	0.185338	3.63746	0.0448564	-1.58513	-1.02804	-1.5099	1.54189	1.04982	-1.46872	0.99	0.936315	0.771637	0.00647118
ST13	12865309	14.0474	0.157508	14.0162	0.157508	14.4644	0.157508	13.7357	0.157508	3.63714	0.0448668	-1.02183	1.33519	-1.24119	1.36434	-1.21468	-1.65723	0.99	0.672531	0.0468935	0.0327724
	12913343	7.0387	0.112297	7.49824	0.112297	7.3583	0.112297	7.11008	0.112297	3.63636	0.0448925	1.3751	1.24798	1.05072	-1.10186	-1.30872	-1.18774	0.99	0.765396	0.00835486	0.365323
LOC521943	12776950	6.89401	0.0836578	6.63636	0.0836578	6.84504	0.0836578	7.01939	0.0836578	3.63368	0.0449807	-1.19554	-1.03453	1.09079	1.15563	1.30408	1.12846	0.99	0.0690693	0.0240082	0.627549
NGLY1	12824342	11.388	0.145134	11.1707	0.145134	11.7599	0.145134	11.1762	0.145134	3.63291	0.045006	-1.16258	1.29408	-1.15807	1.50446	1.00389	-1.49864	0.99	0.217816	0.230919	0.0172974
TMEM194B	12775410	9.92872	0.132672	10.3675	0.132672	9.77222	0.132672	10.0653	0.132672	3.63194	0.0450379	1.35542	-1.11457	1.09931	-1.51072	-1.23298	1.22526	0.99	0.109524	0.593128	0.0173412
ZSWIM7	12763206	9.28816	0.11362	9.40675	0.11362	8.94565	0.11362	9.39968	0.11362	3.63179	0.0450429	1.08567	-1.26796	1.08036	-1.37659	-1.00491	1.36986	0.99	0.149898	0.165657	0.0269155
	12913931	7.89327	0.295355	8.09905	0.295355	8.91907	0.295355	8.99798	0.295355	3.63172	0.0450452	1.15331	2.03609	2.15056	1.76543	1.86468	1.05622	0.99	0.00684974	0.833542	0.638515
SYTL2	12831806	10.0909	0.276592	9.52687	0.276592	10.4481	0.276592	9.29031	0.276592	3.62909	0.045132	-1.47837	1.28094	-1.74179	1.8937	-1.17818	-2.23112	0.99	0.831036	0.304224	0.00897911
SPA17	12831900	7.4991	0.0936022	7.6585	0.0936022	7.92789	0.0936022	7.73878	0.0936022	3.62852	0.0451508	1.11682	1.3461	1.18073	1.2053	1.05722	-1.14006	0.99	0.0186314	0.0873156	0.876552
LOC787484	12784722	4.89921	0.110326	5.25741	0.110326	4.92614	0.110326	4.76213	0.110326	3.62697	0.0452022	1.28182	1.01884	-1.09968	-1.25812	-1.40959	-1.1204	0.99	0.0552805	0.0356177	0.396109
RAET1G	12899691	6.78967	0.2151	6.96251	0.2151	7.73196	0.2151	7.17171	0.2151	3.6265	0.0452178	1.12728	1.92159	1.30319	1.70463	1.15605	-1.47453	0.99	0.0201601	0.114099	0.385548
ZNF131	12786464	10.8648	0.160957	10.7584	0.160957	11.3483	0.160957	10.6556	0.160957	3.62578	0.0452416	-1.07658	1.39813	-1.15601	1.50519	-1.07378	-1.61625	0.99	0.259745	0.0936198	0.028834
LOC788220	12869410	5.9834	0.132225	5.77922	0.132225	6.27666	0.132225	6.30765	0.132225	3.62475	0.0452756	-1.15203	1.22541	1.25202	1.41171	1.44236	1.02171	0.99	0.00906824	0.391336	0.524889
LOC785470	12733926	5.90495	0.224704	5.73768	0.224704	6.67971	0.224704	6.34887	0.224704	3.62394	0.0453026	-1.12293	1.71091	1.3603	1.92123	1.52753	-1.25774	0.99	0.00946774	0.72223	0.289427
SGSM1	12742696	7.34006	0.103572	7.52299	0.103572	7.38186	0.103572	7.77682	0.103572	3.62242	0.045353	1.13518	1.0294	1.35355	-1.10276	1.19237	1.3149	0.99	0.179032	0.326215	0.0163522
CALCA	12729903	5.88311	0.074636	6.18395	0.074636	6.05314	0.074636	6.18152	0.074636	3.62117	0.0453947	1.23186	1.12508	1.22979	-1.09491	-1.00168	1.09307	0.99	0.283479	0.270451	0.0139487
	12913617	6.64321	0.096372	6.75766	0.096372	6.80476	0.096372	7.07583	0.096372	3.61862	0.0454796	1.08256	1.11849	1.34969	1.03319	1.24675	1.2067	0.99	0.0284863	0.432277	0.0686366
SLC9A9	12681617	12.9581	0.182952	12.882	0.182952	13.2884	0.182952	13.6428	0.182952	3.61851	0.0454831	-1.05411	1.25732	1.60745	1.32535	1.69443	1.27848	0.99	0.0114418	0.262244	0.461433
NUDT15	12709710	7.87035	0.0916693	7.66754	0.0916693	7.95338	0.0916693	8.08335	0.0916693	3.61843	0.0454859	-1.15094	1.05923	1.15909	1.21912	1.33404	1.09427	0.99	0.0185803	0.0945619	0.698114
LOC787522	12733970	5.28105	0.0900954	5.33227	0.0900954	5.61721	0.0900954	5.58327	0.0900954	3.61688	0.0455376	1.03614	1.26239	1.23304	1.21836	1.19003	-1.0238	0.99	0.00684709	0.64499	0.925206
MIR655	12788830	7.39353	0.177898	7.05261	0.177898	7.80731	0.177898	7.14145	0.177898	3.61224	0.0456928	-1.26656	1.33217	-1.19092	1.68728	1.06351	-1.58652	0.99	0.183163	0.379077	0.0151851
TFF3	12684878	6.47998	0.0659953	6.71535	0.0659953	6.70359	0.0659953	6.50646	0.0659953	3.61115	0.0457293	1.17721	1.16765	1.01853	-1.00818	-1.1558	-1.14642	0.99	0.913016	0.00661991	0.776977
LOC512220	12727636	8.53133	0.144937	8.32059	0.144937	8.84645	0.144937	8.90764	0.144937	3.61084	0.0457396	-1.15728	1.24412	1.29802	1.43979	1.50217	1.04333	0.99	0.00898259	0.366692	0.615287
LOC100296964	12723964	7.0889	0.101487	7.4628	0.101487	7.05197	0.101487	7.30548	0.101487	3.60738	0.0458561	1.29585	-1.02593	1.16197	-1.32945	-1.11522	1.1921	0.99	0.357426	0.564084	0.00934478
LOC787021	12797600	7.82165	0.0867758	7.84267	0.0867758	7.99836	0.0867758	8.17696	0.0867758	3.60553	0.0459182	1.01468	1.1303	1.27926	1.11395	1.26076	1.13179	0.99	0.0122732	0.381736	0.272442
SECTM1	12765856	9.59935	0.184205	9.61637	0.184205	8.8703	0.184205	9.28748	0.184205	3.6051	0.045933	1.01187	-1.65756	-1.24132	-1.67722	-1.25605	1.33532	0.99	0.0140466	0.298728	0.261406
A2LD1	12709585	6.91588	0.115403	7.07508	0.115403	6.60047	0.115403	7.05474	0.115403	3.60501	0.045936	1.11666	-1.24437	1.10104	-1.38954	-1.01419	1.37009	0.99	0.171421	0.225261	0.0208713
TEAD4	12866766	7.17403	0.0857068	7.24203	0.0857068	7.23048	0.0857068	6.89565	0.0857068	3.60233	0.0460262	1.04826	1.03991	-1.21283	-1.00803	-1.27137	-1.26124	0.99	0.116545	0.0367067	0.145513
TRIML2	12825196	7.6027	0.123932	7.39518	0.123932	7.96431	0.123932	7.65482	0.123932	3.60075	0.0460798	-1.1547	1.28486	1.03679	1.48363	1.19718	-1.23927	0.99	0.0275874	0.688034	0.0590082
CDH5	12749712	10.9824	0.122517	11.0679	0.122517	10.7455	0.122517	11.3085	0.122517	3.60069	0.046082	1.06106	-1.17846	1.25362	-1.25041	1.18148	1.47734	0.99	0.988201	0.0750962	0.0213134
TRPS1	12723264	13.098	0.202232	12.6956	0.202232	13.5128	0.202232	12.7228	0.202232	3.60056	0.0460864	-1.32166	1.33311	-1.29693	1.76192	1.01907	-1.72895	0.99	0.295882	0.35688	0.0121957
BTG3	12682216	10.1869	0.111872	9.7836	0.111872	10.2496	0.111872	9.9752	0.111872	3.59985	0.0461105	-1.32255	1.04442	-1.15807	1.3813	1.14203	-1.20951	0.99	0.277906	0.575189	0.0104828
DPPA4	12741675	7.62751	0.128335	7.60185	0.128335	7.21	0.128335	7.1779	0.128335	3.59966	0.0461168	-1.01795	-1.33562	-1.36567	-1.31208	-1.34159	-1.0225	0.99	0.00660003	0.98041	0.825753
KCNJ5	12831632	5.42368	0.0744729	5.49722	0.0744729	5.38335	0.0744729	5.70114	0.0744729	3.59941	0.0461252	1.0523	-1.02834	1.21206	-1.08212	1.15183	1.24642	0.99	0.293579	0.126978	0.0220849
LOC505001	12896841	6.13763	0.215803	6.38781	0.215803	6.70784	0.215803	7.08386	0.215803	3.59913	0.0461346	1.18936	1.48474	1.92683	1.24835	1.62006	1.29776	0.99	0.0125147	0.7756	0.172446
LOC100140203	12869542	6.64735	0.0952819	6.34283	0.0952819	6.27613	0.0952819	6.58392	0.0952819	3.59704	0.0462058	-1.23501	-1.29344	-1.04494	-1.04731	1.18189	1.23781	0.99	0.507699	0.00744799	0.986602
HSPA8	12730832	17.9369	0.106838	17.8209	0.106838	18.2666	0.106838	17.8609	0.106838	3.59668	0.0462178	-1.08373	1.25669	-1.05413	1.3619	1.02808	-1.32471	0.99	0.109312	0.200167	0.031076
LOC100337469	12876696	10.8497	0.126577	10.797	0.126577	10.9807	0.126577	11.3303	0.126577	3.59577	0.0462487	-1.03719	1.09503	1.39535	1.13575	1.44724	1.27425	0.99	0.0222201	0.137988	0.263514
TIMM50	12750063	10.1326	0.117948	9.95349	0.117948	9.59972	0.117948	9.95786	0.117948	3.59358	0.0463234	-1.13215	-1.44676	-1.12872	-1.27789	1.00303	1.28177	0.99	0.0447792	0.0418859	0.462429
FGF11	12765234	6.98545	0.0840073	6.96228	0.0840073	7.23629	0.0840073	7.26087	0.0840073	3.59164	0.0463895	-1.01619	1.1899	1.21035	1.20917	1.22995	1.01718	0.99	0.00670102	0.781089	0.993454
ADRA1B	12877410	8.13903	0.0957885	7.84098	0.0957885	7.72433	0.0957885	7.8022	0.0957885	3.59153	0.0463931	-1.22948	-1.33302	-1.26298	-1.08421	-1.02725	1.05546	0.99	0.0355876	0.073345	0.272812
LOC100297754	12698097	7.34459	0.135266	7.05157	0.135266	7.35019	0.135266	7.67883	0.135266	3.58999	0.0464457	-1.2252	1.00389	1.26071	1.22997	1.54462	1.25583	0.99	0.0374335	0.0403509	0.89743
MGC152340	12906158	6.78551	0.0844518	6.85975	0.0844518	7.15467	0.0844518	6.96031	0.0844518	3.58952	0.0464618	1.05281	1.2916	1.12881	1.22681	1.07219	-1.14421	0.99	0.0166198	0.137762	0.490587
LOC782865	12733833	7.672	0.118481	7.31333	0.118481	7.1578	0.118481	7.50799	0.118481	3.58949	0.0464626	-1.28224	-1.4282	-1.1204	-1.11383	1.14445	1.27473	0.99	0.202402	0.0112439	0.972041
LOC613441	12891708	7.11826	0.117529	7.32955	0.117529	7.35514	0.117529	7.65897	0.117529	3.5873	0.0465377	1.15773	1.17844	1.4547	1.01789	1.25651	1.23442	0.99	0.0329606	0.700717	0.0488769
FAM76A	12783122	11.0999	0.186484	11.6994	0.186484	10.9765	0.186484	10.942	0.186484	3.58718	0.0465418	1.51511	-1.08936	-1.11574	-1.6505	-1.69047	-1.02422	0.99	0.0359295	0.11493	0.15576
SYNCRIP	12897079	12.7258	0.121022	12.3608	0.121022	12.9126	0.121022	12.6638	0.121022	3.58505	0.0466148	-1.28786	1.13824	-1.04391	1.46589	1.23369	-1.18822	0.99	0.0658789	0.639876	0.0261396
TNFRSF12A	12814086	9.36285	0.238346	8.9235	0.238346	9.90037	0.238346	8.97629	0.238346	3.58274	0.046694	-1.35599	1.45147	-1.30728	1.96819	1.03726	-1.89748	0.99	0.239274	0.329279	0.0143485
LOC100337363	12896564	6.26118	0.0901172	6.56614	0.0901172	6.48362	0.0901172	6.66063	0.0901172	3.58234	0.0467079	1.23539	1.1667	1.319	-1.05887	1.06768	1.13054	0.99	0.104135	0.491309	0.0202545
ZMAT1	12907413	7.55555	0.0709306	7.70902	0.0709306	7.67141	0.0709306	7.87985	0.0709306	3.58093	0.0467563	1.11224	1.08362	1.25206	-1.02641	1.12571	1.15544	0.99	0.0661737	0.705178	0.0254116
PRAF2	12907709	9.35904	0.106606	9.37503	0.106606	8.93936	0.106606	9.22328	0.106606	3.58022	0.0467807	1.01115	-1.33763	-1.09867	-1.35254	-1.11091	1.2175	0.99	0.020034	0.232794	0.184895
LOC100140607	12852617	9.35614	0.0832096	9.67903	0.0832096	9.33797	0.0832096	9.42714	0.0832096	3.57882	0.046829	1.25084	-1.01267	1.05045	-1.26668	-1.19076	1.06376	0.99	0.130609	0.185545	0.0291683
YTHDF2	12783927	12.4886	0.0947699	12.4931	0.0947699	12.4846	0.0947699	12.1304	0.0947699	3.57515	0.0469558	1.00311	-1.00276	-1.28178	-1.00587	-1.28576	-1.27825	0.99	0.0770228	0.082832	0.0898488
ACHE	12813833	6.65789	0.0890645	6.85103	0.0890645	6.83672	0.0890645	7.06898	0.0890645	3.57116	0.0470942	1.14325	1.13197	1.32969	-1.00997	1.16308	1.17467	0.99	0.0458151	0.829883	0.0342483
	12913857	7.48279	0.0686457	7.54382	0.0686457	7.74193	0.0686457	7.45432	0.0686457	3.56637	0.0472605	1.0432	1.19676	-1.01993	1.1472	-1.064	-1.22062	0.99	0.240243	0.0259679	0.124764
TIRAP	12831282	8.61885	0.102254	8.95489	0.102254	8.52143	0.102254	8.59258	0.102254	3.56521	0.047301	1.26229	-1.06986	-1.01838	-1.35047	-1.28549	1.05055	0.99	0.0441542	0.219583	0.0697421
CBX8	12761939	7.25882	0.0861986	7.57042	0.0861986	7.59209	0.0861986	7.58847	0.0861986	3.56241	0.047399	1.24108	1.25986	1.25671	1.01513	1.01259	-1.00251	0.99	0.0642353	0.0924391	0.099297
SKA3	12709472	8.77088	0.300473	8.59847	0.300473	9.80262	0.300473	8.66459	0.300473	3.5582	0.0475466	-1.12694	2.04449	-1.07646	2.30401	1.04689	-2.20081	0.99	0.092683	0.134067	0.0498364
GANC	12690268	9.25206	0.172213	9.6194	0.172213	8.88606	0.172213	9.50444	0.172213	3.55732	0.0475772	1.28997	-1.28878	1.19117	-1.66249	-1.08295	1.53516	0.99	0.187878	0.480055	0.0143024
	12912721	8.07063	0.274435	8.82368	0.274435	8.72033	0.274435	9.33016	0.274435	3.55697	0.0475896	1.68534	1.56883	2.39417	-1.07427	1.42058	1.52608	0.99	0.0568871	0.798583	0.0287959
CLDND2	12759517	7.35924	0.0861487	7.09585	0.0861487	7.46223	0.0861487	7.40757	0.0861487	3.55626	0.0476146	-1.2003	1.074	1.03407	1.28912	1.24119	-1.03861	0.99	0.0330942	0.249034	0.0897015
KPNA7	12814671	6.62828	0.0837885	6.42326	0.0837885	6.56561	0.0837885	6.80441	0.0837885	3.55571	0.0476339	-1.1527	-1.0444	1.12985	1.1037	1.30238	1.18002	0.99	0.0816495	0.0212384	0.843577
SLC25A4	12823572	10.2148	0.094142	10.1844	0.094142	9.84703	0.094142	9.9598	0.094142	3.55561	0.0476376	-1.02128	-1.29033	-1.19332	-1.26345	-1.16845	1.0813	0.99	0.00843728	0.461783	0.669451
HABP2	12819326	6.50191	0.0566396	6.5641	0.0566396	6.71615	0.0566396	6.47905	0.0566396	3.55512	0.0476548	1.04405	1.16009	-1.01597	1.11114	-1.06073	-1.17862	0.99	0.276382	0.0214885	0.148536
LOC100140202	12766631	6.89037	0.0871959	6.9477	0.0871959	7.26276	0.0871959	7.06332	0.0871959	3.55421	0.0476867	1.04054	1.29449	1.12736	1.24406	1.08344	-1.14825	0.99	0.0160933	0.166665	0.431012
LOC787688	12852527	5.9017	0.114035	5.69629	0.114035	5.90835	0.114035	6.21759	0.114035	3.55268	0.0477405	-1.15302	1.00462	1.24478	1.15834	1.43525	1.23905	0.99	0.0391282	0.043479	0.657068
LOC100337019	12863876	7.30715	0.0621971	7.54294	0.0621971	7.3785	0.0621971	7.53589	0.0621971	3.55159	0.047779	1.17755	1.0507	1.17181	-1.12073	-1.0049	1.11527	0.99	0.614575	0.540332	0.00820957
KIF2C	12846146	7.82881	0.0740048	8.01015	0.0740048	7.66886	0.0740048	7.83005	0.0740048	3.55106	0.0477977	1.13394	-1.11725	1.00086	-1.2669	-1.13297	1.11821	0.99	0.0403771	0.893903	0.0391703
NFU1	12708063	11.116	0.160872	10.9594	0.160872	10.4681	0.160872	11.0983	0.160872	3.55031	0.0478243	-1.11472	-1.56694	-1.01234	-1.40569	1.10112	1.54783	0.99	0.139652	0.0308288	0.166784
VPS37B	12743870	7.26813	0.145799	6.96714	0.145799	7.61797	0.145799	7.42199	0.145799	3.54994	0.0478375	-1.23199	1.27442	1.11254	1.57007	1.37065	-1.1455	0.99	0.0172916	0.725003	0.114055
ADCY5	12683891	9.98415	0.181417	9.40777	0.181417	9.23704	0.181417	9.78513	0.181417	3.54974	0.0478445	-1.49111	-1.67843	-1.14793	-1.12563	1.29896	1.46214	0.99	0.328272	0.00920487	0.939111
KCNH3	12865921	6.87477	0.101385	7.06026	0.101385	7.24115	0.101385	7.29603	0.101385	3.54615	0.0479714	1.1372	1.28911	1.33909	1.13358	1.17753	1.03877	0.99	0.0117105	0.53162	0.258797
LOC100336989	12873035	8.09004	0.0882338	7.81519	0.0882338	8.03843	0.0882338	8.21242	0.0882338	3.54386	0.0480526	-1.20986	-1.03642	1.08853	1.16735	1.31697	1.12818	0.99	0.0738213	0.0257741	0.578222
	12913789	9.78273	0.203874	10.5682	0.203874	10.6204	0.203874	10.2808	0.203874	3.54356	0.0480635	1.72366	1.7872	1.41237	1.03686	-1.2204	-1.26538	0.99	0.202016	0.0173056	0.295614
LOC506670	12724474	5.47706	0.081289	5.60295	0.081289	5.83737	0.081289	5.70602	0.081289	3.54269	0.0480943	1.09118	1.2837	1.17199	1.17643	1.07405	-1.09532	0.99	0.0146186	0.139573	0.973797
LOC616695	12905841	7.05537	0.108785	7.2463	0.108785	7.49195	0.108785	7.46432	0.108785	3.54163	0.0481319	1.1415	1.35339	1.32772	1.18563	1.16314	-1.01933	0.99	0.0108888	0.334939	0.467364
ELL2	12888160	13.875	0.330497	13.9497	0.330497	15.1265	0.330497	13.8346	0.330497	3.54064	0.0481674	1.05318	2.38097	-1.0284	2.26075	-1.08309	-2.44859	0.99	0.111236	0.0609415	0.0903938
LRRC42	12846428	8.168	0.107068	8.29655	0.107068	7.82158	0.107068	8.05945	0.107068	3.53823	0.0482532	1.0932	-1.27141	-1.07814	-1.3899	-1.17862	1.17926	0.99	0.0184352	0.618933	0.112743
LOC100296787	12717824	7.22738	0.0897651	7.27132	0.0897651	7.53127	0.0897651	7.54833	0.0897651	3.53591	0.0483362	1.03093	1.23447	1.24916	1.19744	1.21168	1.0119	0.99	0.00714324	0.883437	0.739868
LOC783380	12899068	7.30078	0.169522	6.9195	0.169522	7.56701	0.169522	7.61426	0.169522	3.53407	0.0484022	-1.3025	1.20266	1.2427	1.56647	1.61862	1.03329	0.99	0.0150515	0.230252	0.343966
ZSWIM4	12882177	7.29207	0.0773676	7.18483	0.0773676	7.53266	0.0773676	7.3363	0.0773676	3.53389	0.0484086	-1.07717	1.18148	1.03113	1.27265	1.1107	-1.14581	0.99	0.0262366	0.575312	0.0733598
LOC100335960	12915165	8.59531	0.0914351	8.65207	0.0914351	8.58276	0.0914351	8.94842	0.0914351	3.53251	0.048458	1.04012	-1.00874	1.2773	-1.04921	1.22804	1.28847	0.99	0.146654	0.116964	0.0394831
CTLA4	12774520	9.06734	0.10862	8.72655	0.10862	8.66299	0.10862	8.61741	0.10862	3.53229	0.0484659	-1.26645	-1.32349	-1.36597	-1.04504	-1.07858	-1.03209	0.99	0.0358114	0.199156	0.100639
RABGEF1	12811487	11.8323	0.213603	11.409	0.213603	12.3818	0.213603	11.7799	0.213603	3.52518	0.0487218	-1.34101	1.46355	-1.03702	1.96265	1.29314	-1.51774	0.99	0.0522358	0.683283	0.0335247
USP30	12745062	10.6517	0.148011	10.6274	0.148011	10.0509	0.148011	10.4226	0.148011	3.52481	0.0487349	-1.01692	-1.51655	-1.17204	-1.49133	-1.15254	1.29394	0.99	0.0185567	0.205809	0.26311
LOC100337481	12713531	16.2384	0.0657656	16.1275	0.0657656	16.3601	0.0657656	16.0842	0.0657656	3.52474	0.0487378	-1.0799	1.08796	-1.11284	1.17489	-1.0305	-1.21073	0.99	0.562827	0.233628	0.0123592
MLST8	12813624	8.89157	0.199534	9.04769	0.199534	8.18695	0.199534	8.68753	0.199534	3.52401	0.0487639	1.11429	-1.62971	-1.15192	-1.81597	-1.28357	1.41478	0.99	0.0204803	0.404983	0.125769
MADD	12729022	10.4649	0.272083	10.0852	0.272083	11.196	0.272083	10.1421	0.272083	3.52401	0.0487641	-1.301	1.65996	-1.25069	2.15961	1.04022	-2.07611	0.99	0.173193	0.239006	0.0218018
LOC100296752	12693046	6.20063	0.158818	6.91447	0.158818	6.5745	0.158818	6.68623	0.158818	3.51961	0.0489234	1.64016	1.29582	1.40017	-1.26573	-1.1714	1.08053	0.99	0.654799	0.0823534	0.0232635
AATK	12762842	8.44828	0.0903203	8.21171	0.0903203	8.3847	0.0903203	8.62186	0.0903203	3.51943	0.0489297	-1.17819	-1.04506	1.12785	1.12739	1.32882	1.17867	0.99	0.0791416	0.0222819	0.997491
MIR2450C	12872976	10.8392	0.220448	11.1668	0.220448	10.5423	0.220448	10.1988	0.220448	3.51678	0.0490262	1.2549	-1.22854	-1.55885	-1.5417	-1.9562	-1.26886	0.99	0.0141116	0.153881	0.971728
MIR124A-2	12721546	7.26169	0.177433	7.63495	0.177433	7.26423	0.177433	7.95239	0.177433	3.51568	0.0490659	1.29528	1.00176	1.61407	-1.293	1.24612	1.61123	0.99	0.38496	0.392313	0.0112517
LOC531692	12716129	5.40865	0.0749874	5.55164	0.0749874	5.71954	0.0749874	5.68033	0.0749874	3.51533	0.0490789	1.10419	1.24047	1.20722	1.12343	1.09331	-1.02755	0.99	0.0125784	0.247792	0.502118
PSMC5	12760902	11.2005	0.0952638	11.0661	0.0952638	10.8821	0.0952638	11.2934	0.0952638	3.51464	0.049104	-1.09766	-1.24699	1.06646	-1.13605	1.1706	1.32986	0.99	0.640776	0.0142436	0.17185
LOC619061	12905933	12.0617	0.128404	12.4417	0.128404	12.6327	0.128404	12.459	0.128404	3.51353	0.0491444	1.30132	1.48553	1.317	1.14155	1.01205	-1.12797	0.99	0.0408862	0.052075	0.437521
SRRM4	12747966	6.16047	0.0501223	6.16103	0.0501223	6.29135	0.0501223	6.34618	0.0501223	3.51269	0.0491752	1.00039	1.09497	1.13738	1.09454	1.13694	1.03874	0.99	0.00833283	0.598139	0.5907
	12866093	10.9145	0.278735	10.3729	0.278735	9.66892	0.278735	10.0918	0.278735	3.51248	0.0491826	-1.45555	-2.37105	-1.76864	-1.62897	-1.2151	1.3406	0.99	0.017983	0.109234	0.834986
PPFIBP2	12733450	10.576	0.257589	9.83932	0.257589	9.4125	0.257589	9.8509	0.257589	3.51246	0.0491835	-1.66634	-2.24	-1.65301	-1.34427	1.00806	1.35511	0.99	0.0451243	0.0416081	0.573313
LOC618817	12847761	5.14047	0.202722	5.26718	0.202722	5.75464	0.202722	5.93227	0.202722	3.51152	0.0492177	1.0918	1.53068	1.73124	1.40197	1.58566	1.13102	0.99	0.00829434	0.90215	0.467335
	12912073	7.0525	0.146985	6.9788	0.146985	6.99718	0.146985	6.46223	0.146985	3.51112	0.0492323	-1.05241	-1.03909	-1.50553	1.01282	-1.43055	-1.4489	0.99	0.0755308	0.142612	0.0606384
INSIG1	12850024	9.7978	0.367707	9.79201	0.367707	11.1532	0.367707	9.73869	0.367707	3.51109	0.0492334	-1.00402	2.5586	-1.04182	2.56888	-1.03765	-2.66559	0.99	0.102022	0.0795613	0.0774185
LOC100336144	12915187	6.90121	0.125282	7.27805	0.125282	7.33278	0.125282	7.44116	0.125282	3.51035	0.0492604	1.29849	1.3487	1.45393	1.03867	1.1197	1.07802	0.99	0.0351829	0.305067	0.0767062
PA2G4	12868013	13.366	0.130949	13.4058	0.130949	12.9363	0.130949	12.9911	0.130949	3.50905	0.0493079	1.02799	-1.34691	-1.2967	-1.38461	-1.333	1.03872	0.99	0.00730184	0.955344	0.724153
CSTF2	12902966	8.72127	0.119451	8.68911	0.119451	9.02807	0.119451	8.48601	0.119451	3.50701	0.0493827	-1.02254	1.23696	-1.17712	1.26484	-1.15118	-1.45605	0.99	0.671962	0.0541305	0.0333023
	12913375	6.5923	0.253161	7.04337	0.253161	6.58047	0.253161	7.58299	0.253161	3.5049	0.0494601	1.36705	-1.00823	1.98713	-1.37831	1.45359	2.00349	0.99	0.317772	0.297486	0.014067
PPAN-P2RY11	12879645	7.96046	0.138317	7.70322	0.138317	7.39409	0.138317	7.45414	0.138317	3.50433	0.0494812	-1.19519	-1.4808	-1.42042	-1.23896	-1.18845	1.0425	0.99	0.0121948	0.273747	0.489582
MIR2471	12888852	7.72982	0.126073	7.53036	0.126073	8.0527	0.126073	7.96457	0.126073	3.50381	0.0495004	-1.14826	1.25083	1.1767	1.43628	1.35116	-1.063	0.99	0.0110132	0.666728	0.276304
CEP78	12891363	9.61869	0.170316	9.4971	0.170316	10.1371	0.170316	9.43719	0.170316	3.50349	0.0495118	-1.08793	1.43238	-1.13406	1.55832	-1.04241	-1.6244	0.99	0.203178	0.115301	0.0328122
NPTN	12696829	12.7662	0.0724746	12.6131	0.0724746	12.9189	0.0724746	12.6603	0.0724746	3.50039	0.0496261	-1.11198	1.11167	-1.07615	1.23615	1.03329	-1.19632	0.99	0.192869	0.480774	0.0148835
AMPD1	12838005	5.93487	0.0828208	6.24392	0.0828208	6.24959	0.0828208	6.24048	0.0828208	3.49994	0.0496429	1.23889	1.24377	1.23594	1.00394	-1.00238	-1.00633	0.99	0.0847045	0.0788389	0.0952664
LOC787988	12733998	8.16983	0.117613	8.50005	0.117613	8.29408	0.117613	8.66691	0.117613	3.49913	0.0496727	1.2572	1.08994	1.41135	-1.15346	1.12262	1.29489	0.99	0.23954	0.859253	0.0112994
LOC783203	12807062	5.71268	0.219665	4.92739	0.219665	4.86681	0.219665	4.88438	0.219665	3.49562	0.0498025	-1.72344	-1.79735	-1.77559	-1.04288	-1.03026	1.01225	0.99	0.0659064	0.092588	0.106072
SLC37A1	12679850	8.82458	0.0991125	8.4351	0.0991125	8.47982	0.0991125	8.45272	0.0991125	3.49409	0.0498593	-1.30992	-1.26994	-1.29402	1.03148	1.01229	-1.01896	0.99	0.124784	0.092482	0.0573854
LOC789692	12911421	7.40049	0.154998	8.10971	0.154998	7.73846	0.154998	7.7502	0.154998	3.49205	0.0499346	1.63492	1.26398	1.27431	-1.29348	-1.28299	1.00817	0.99	0.945748	0.044	0.0383669
	12913421	10.7647	0.208659	10.2057	0.208659	11.1057	0.208659	10.9317	0.208659	3.49115	0.0499682	-1.4733	1.26657	1.1227	1.86604	1.65408	-1.12814	0.99	0.025154	0.374289	0.104472
1 HUGO gene symbol.
2 Transcript ID from the Affymetrix Bovine 1.1ST Array.
3 LSMEANS value for the relative transcript abunance based on log2 averaged over the animals in the (Q1) high gain-high intake group (n=4). Q2 were high gain-low intake animals (n=4).
Q3 were low gain-low intake animals (n=4). Q4 were low gain-high intake animals (n=4)
4 Standard errors averaged over the animals in the Q1 (high gain-high intake) group. Q2 (high gain-low intake) animals. Q3 (low gain-low intake) group. Q4 (low gain-high intake) steers.
5 The fold change difference between Q1 and Q2.
6 False discovery rate (FDR) calculated with Benjamini-Hochberg Step-Up FDR-controlling procedure (Benjamini & Hochberg, 1994).
